# Supplementary material for: Clustering Accelerometer Activity Patterns from the UK Biobank Cohort
Source: MDPI journal article supplement (doi:10.3390/s21248220), 2021-12-09
Supplement: s1 [file s1]

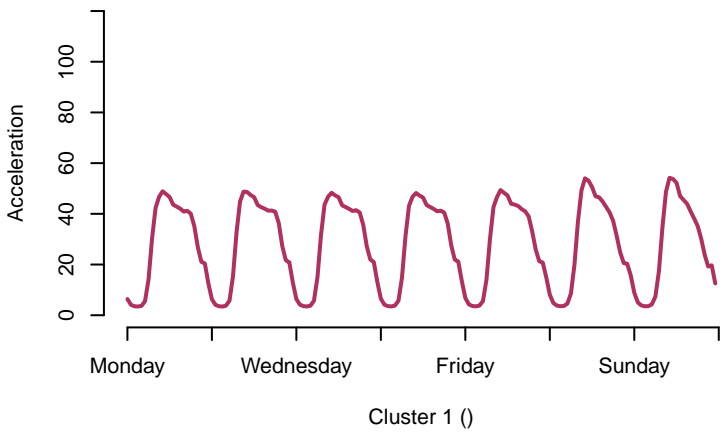

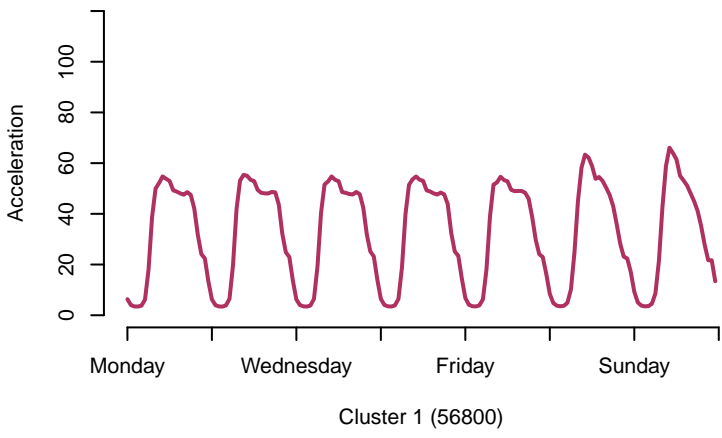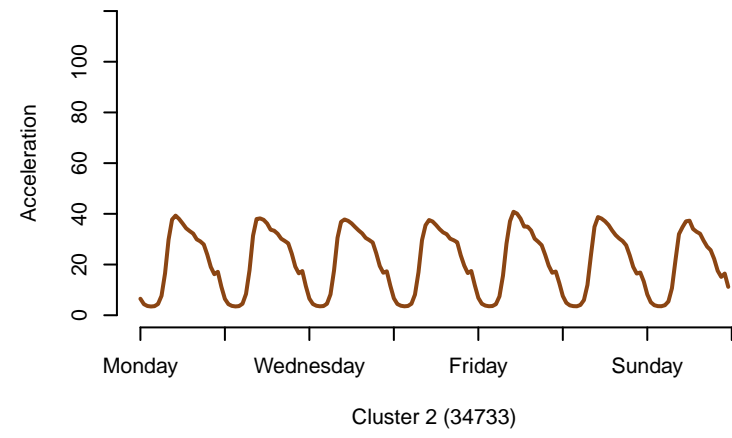

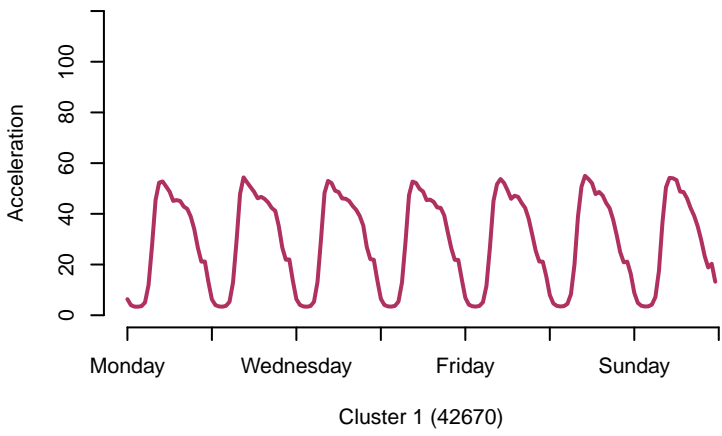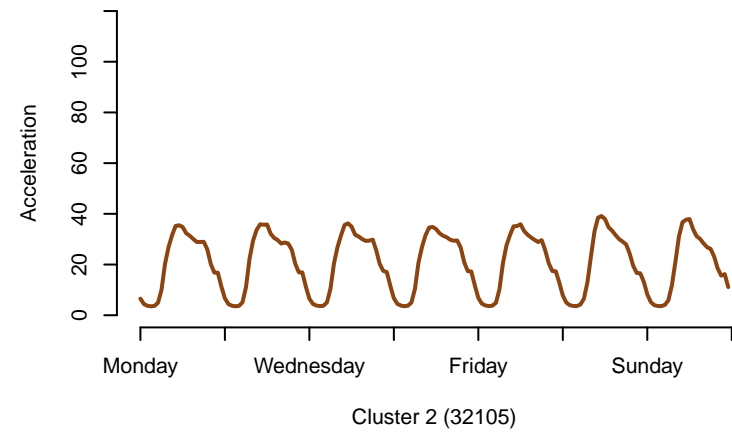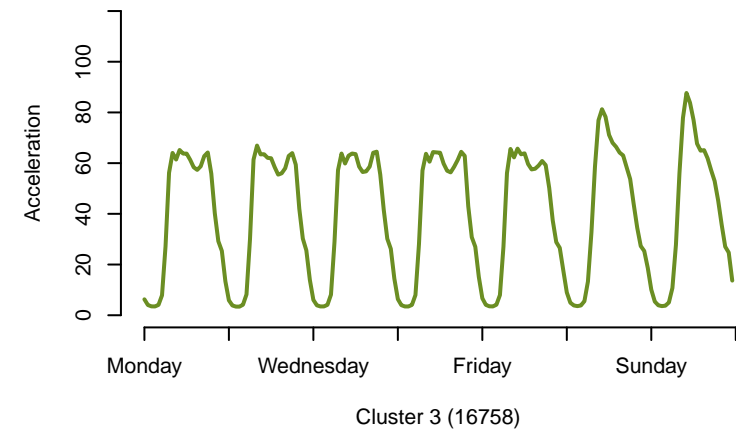

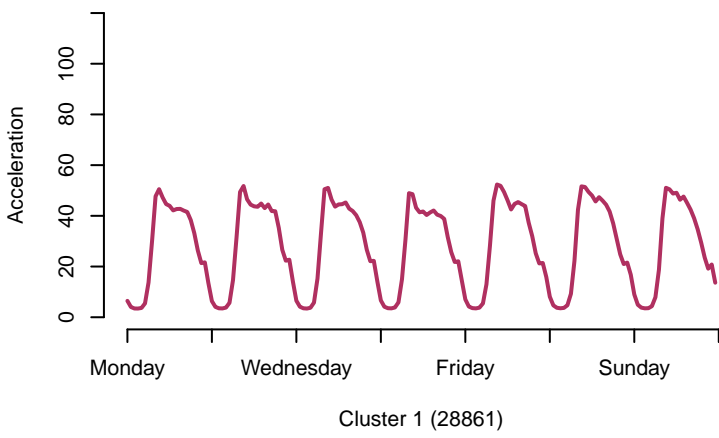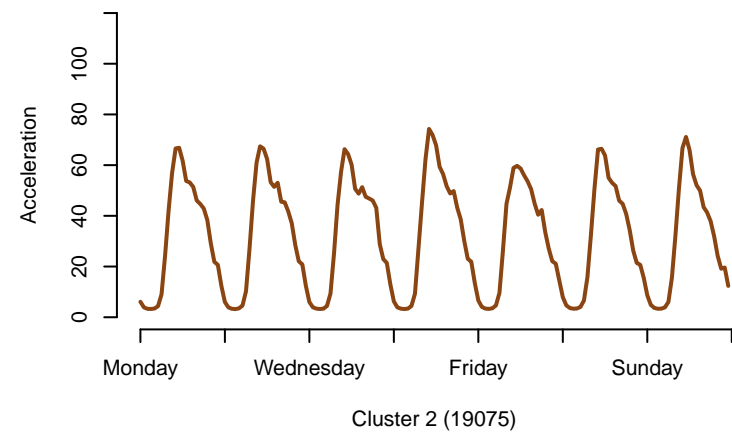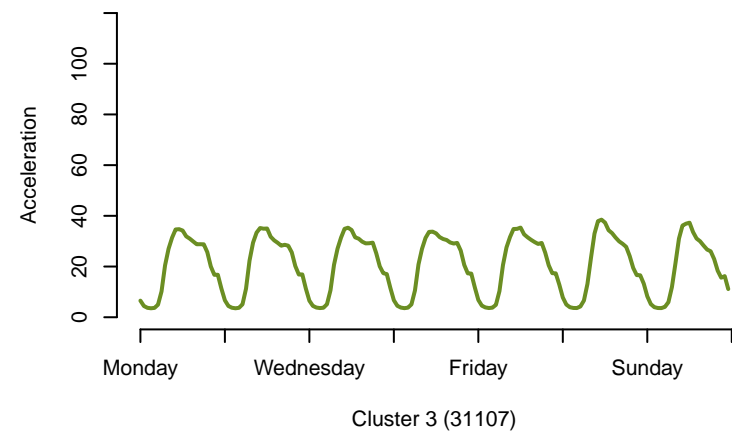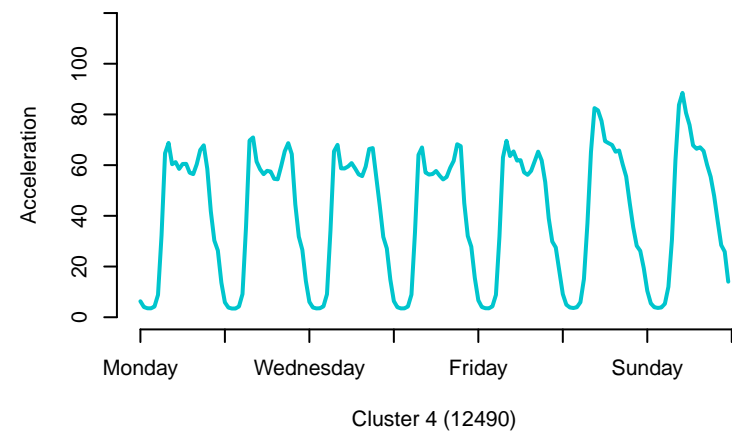

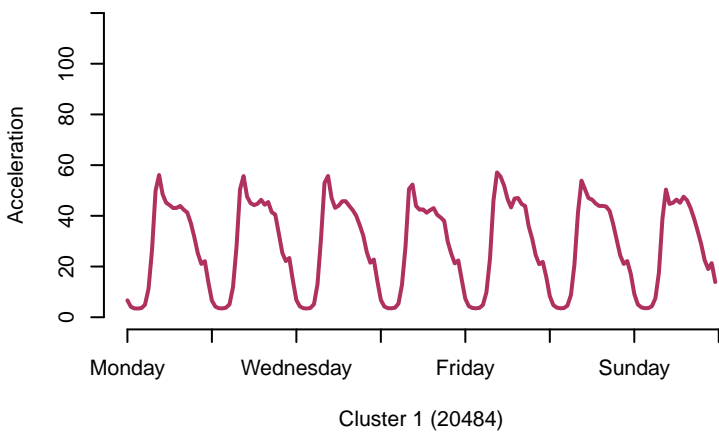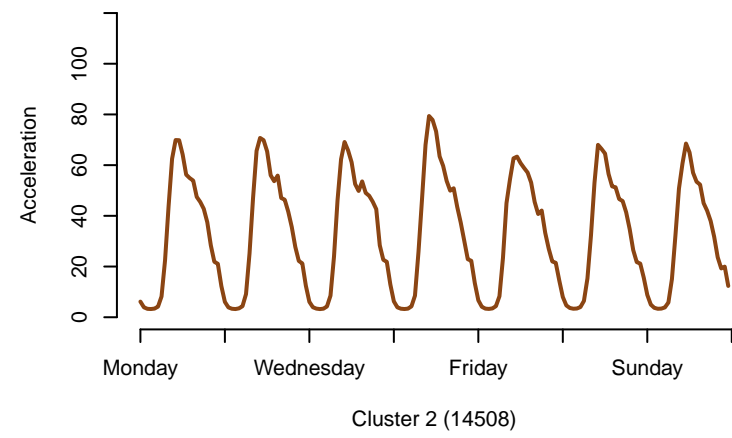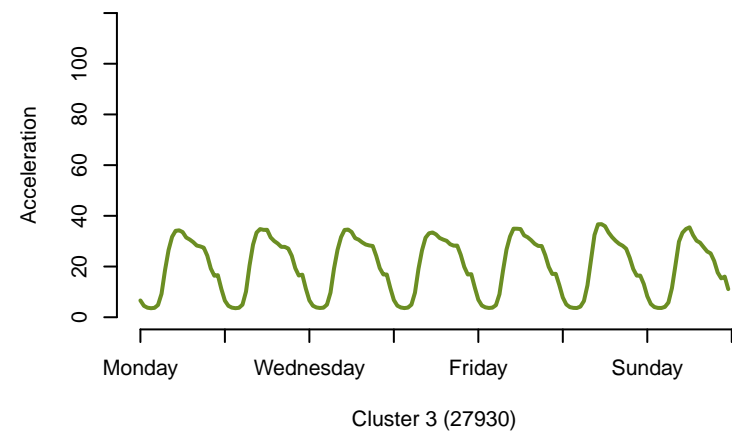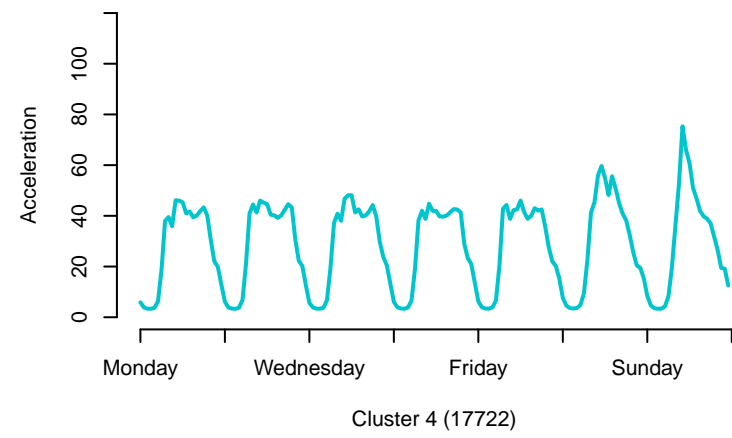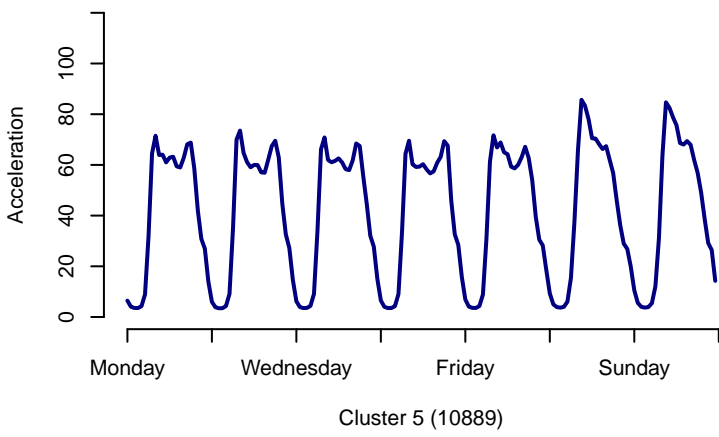

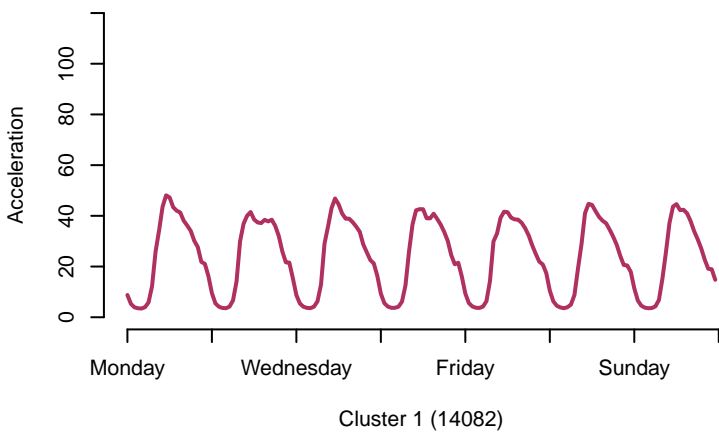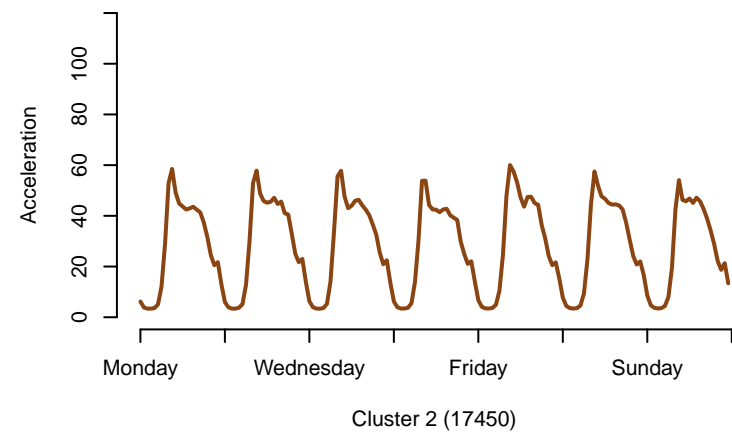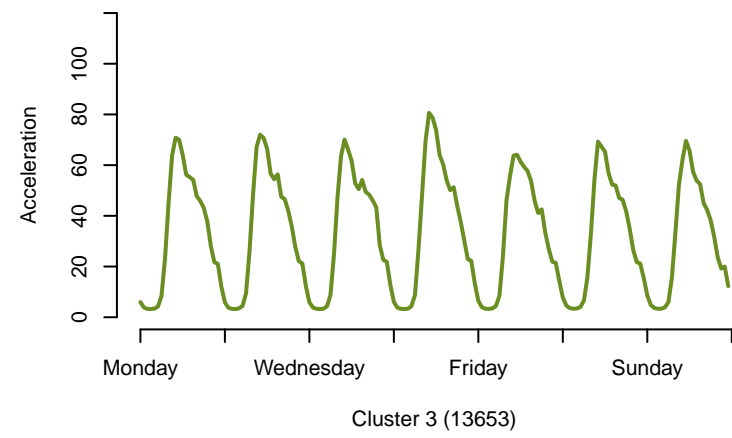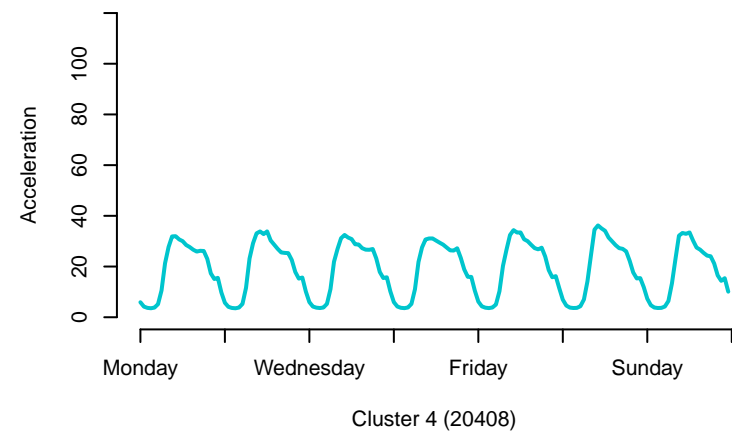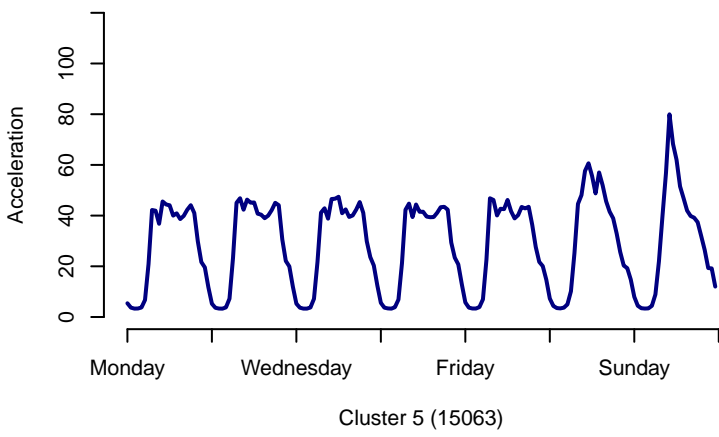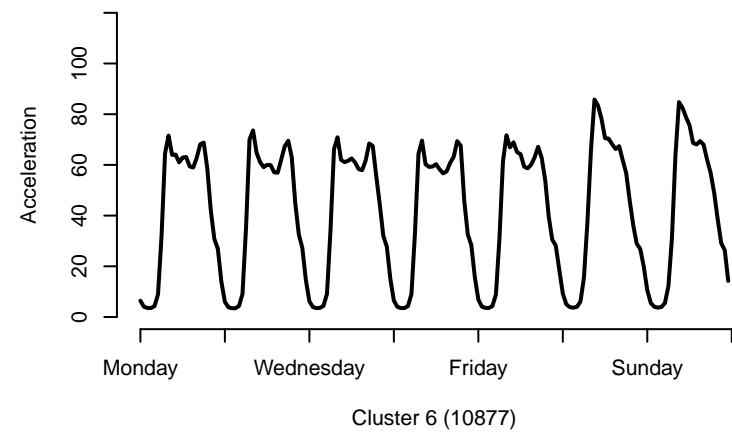

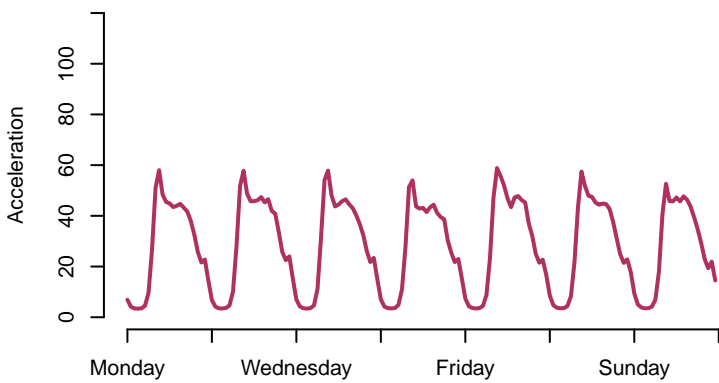

Cluster 1 (17603)

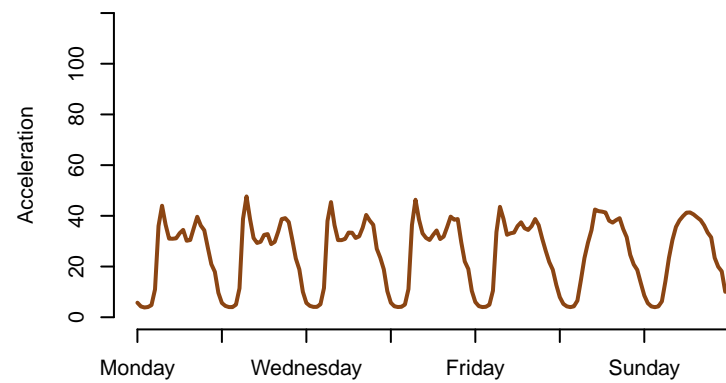

Cluster 2 (9119)

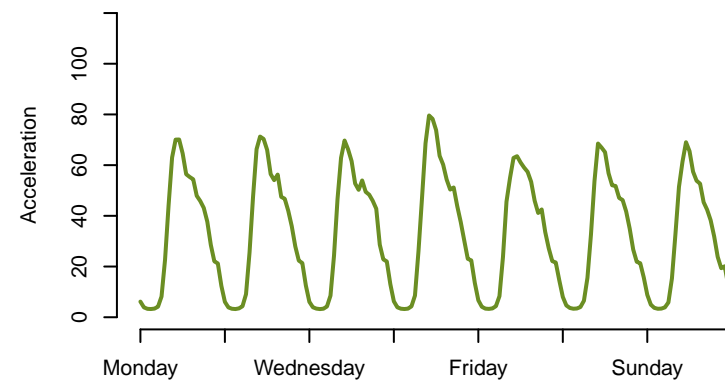

Cluster 3 (14065)

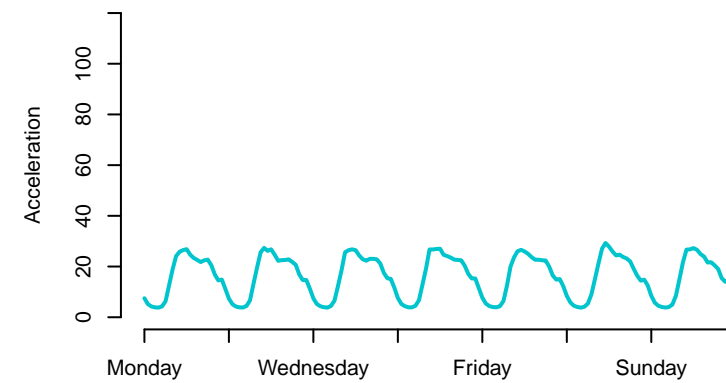

Cluster 4 (7334)

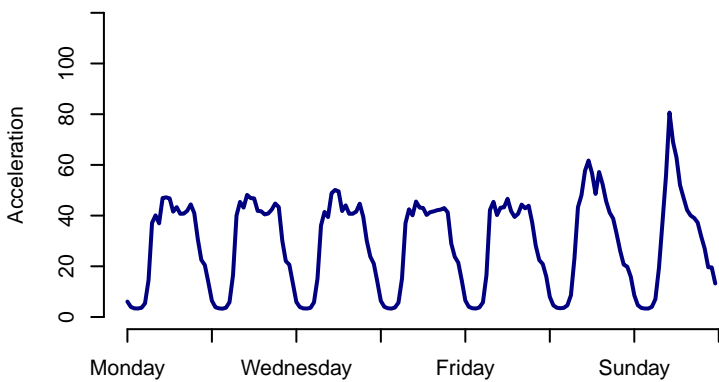

Cluster 5 (14518)

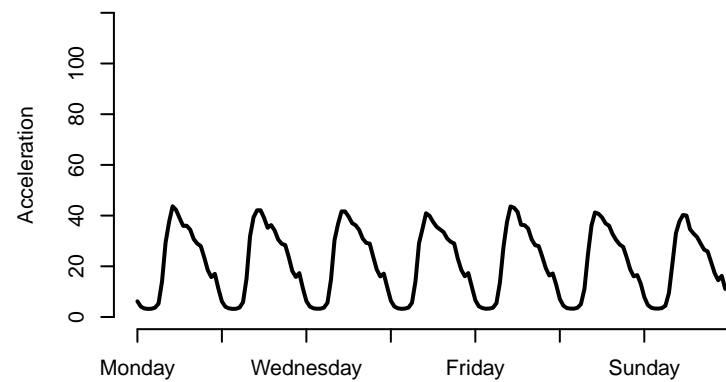

Cluster 6 (18187)

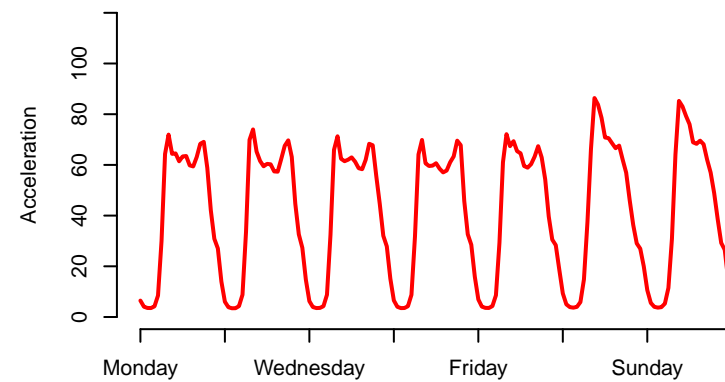

Cluster 7 (10707)

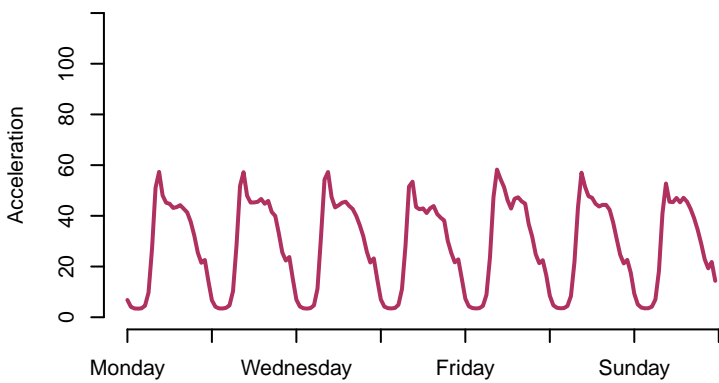

Cluster 1 (17080)

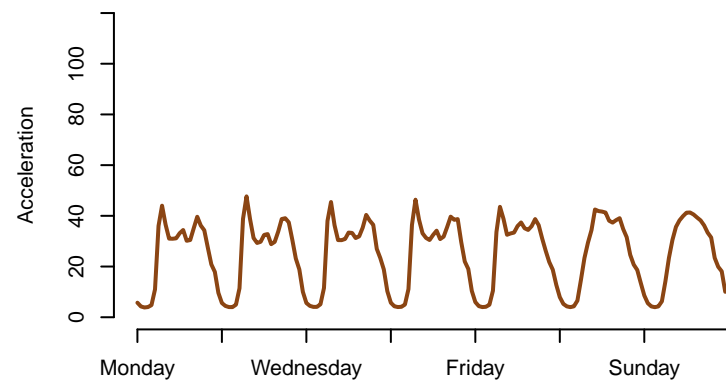

Cluster 2 (9111)

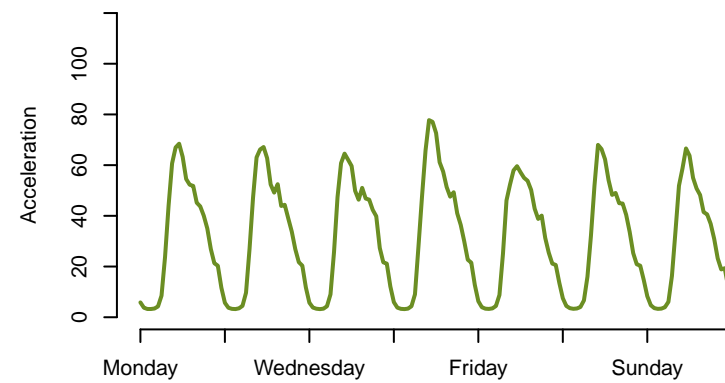

Cluster 3 (11312)



Cluster 4 (7334)

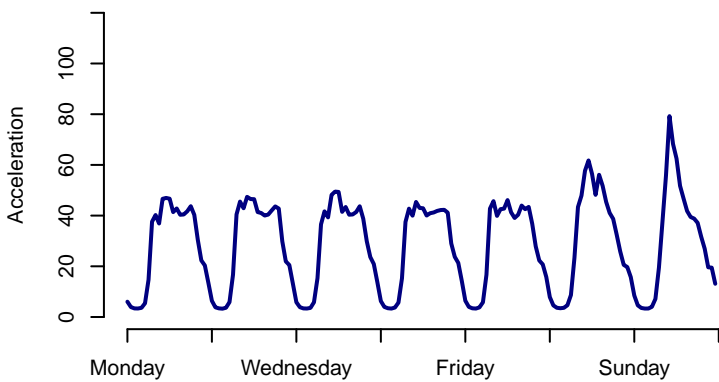

Cluster 5 (14169)

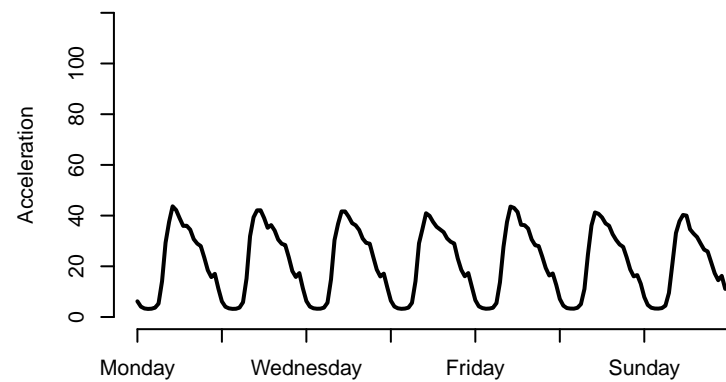

Cluster 6 (18182)

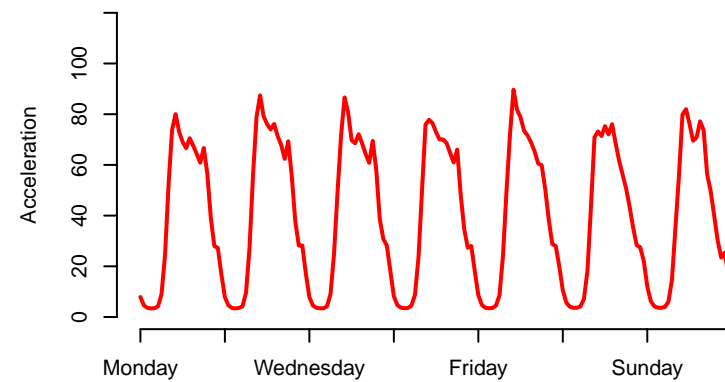

Cluster 7 (6025)

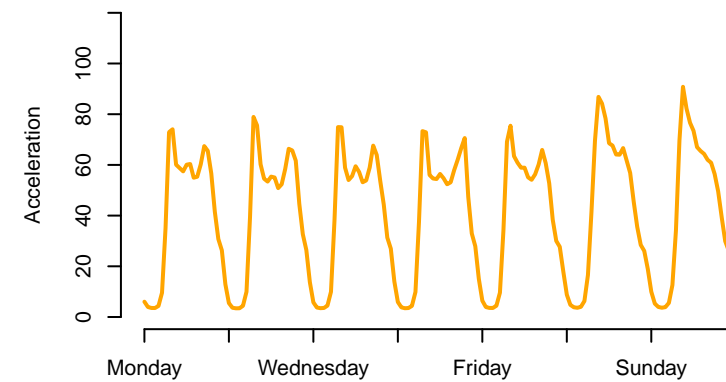

Cluster 8 (8320)



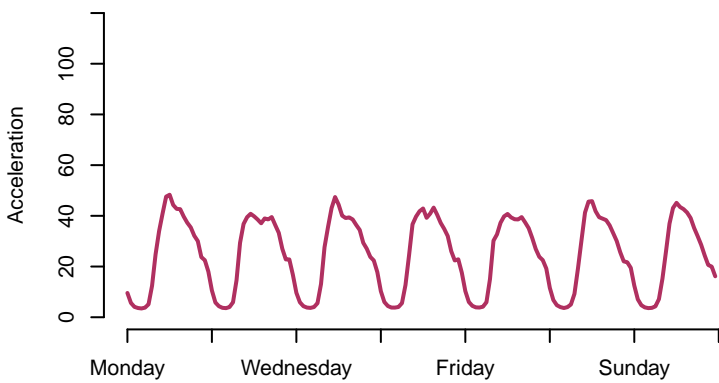

Cluster 1 (11037)

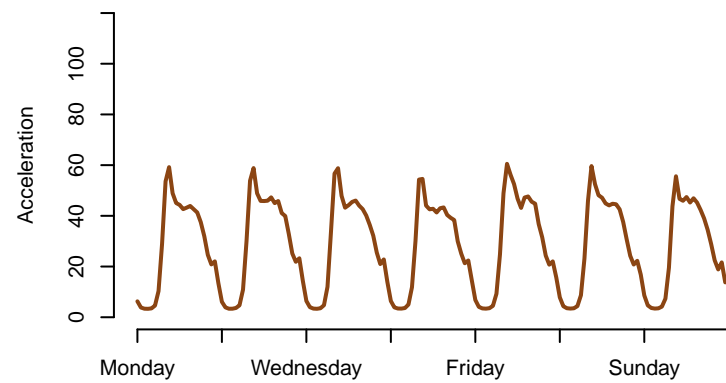

Cluster 2 (15154)

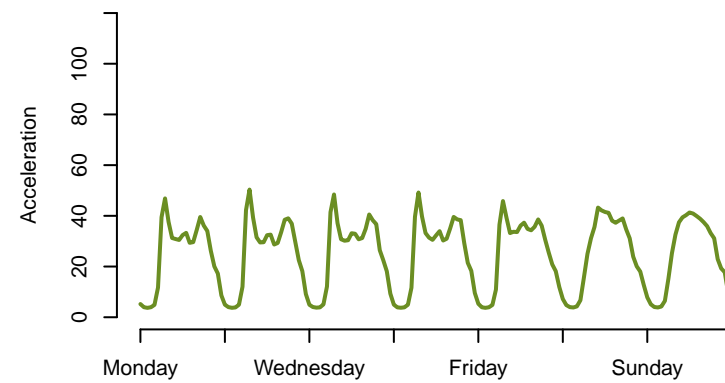

Cluster 3 (8064)

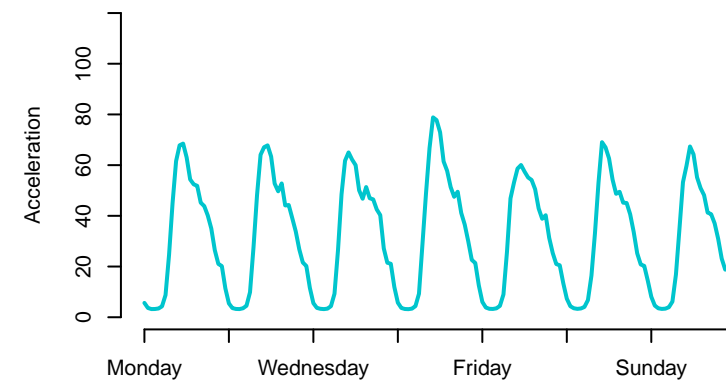

Cluster 4 (10758)

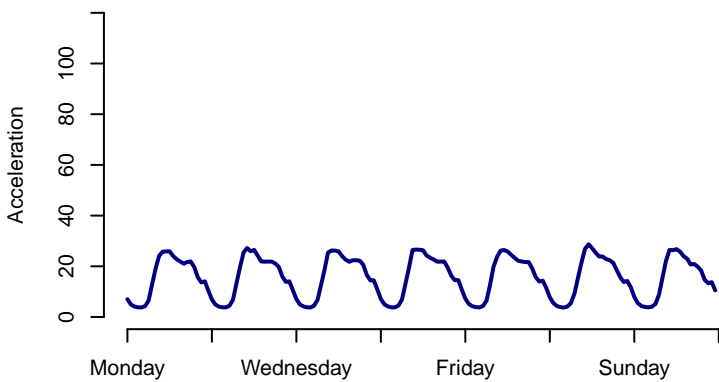

Cluster 5 (6787)

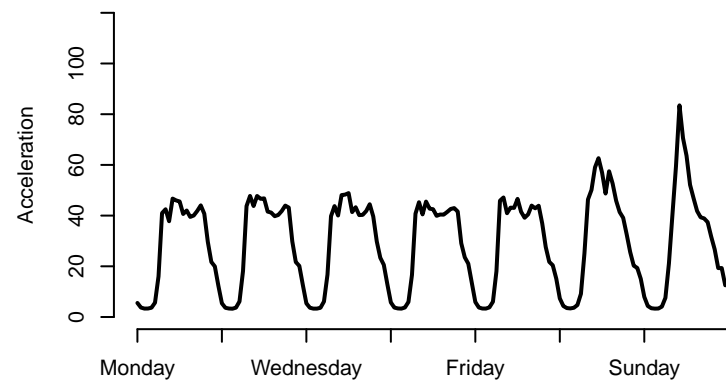

Cluster 6 (12395)

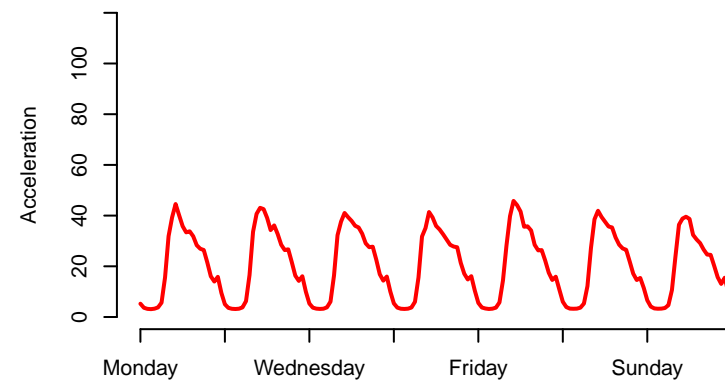

Cluster 7 (13050)

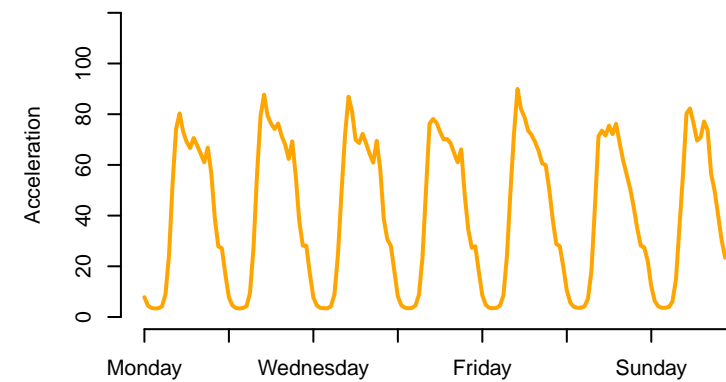

Cluster 8 (5975)

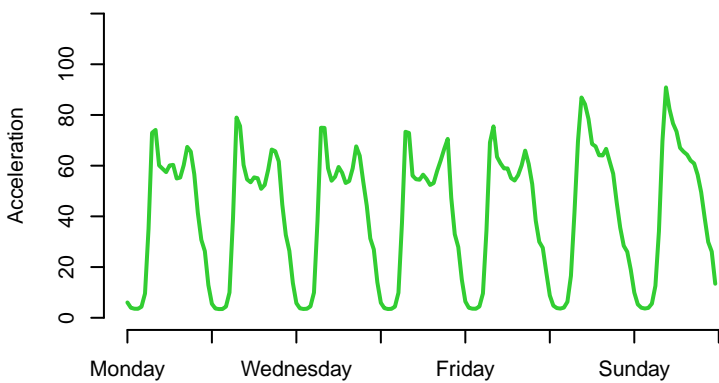

Cluster 9 (8313)

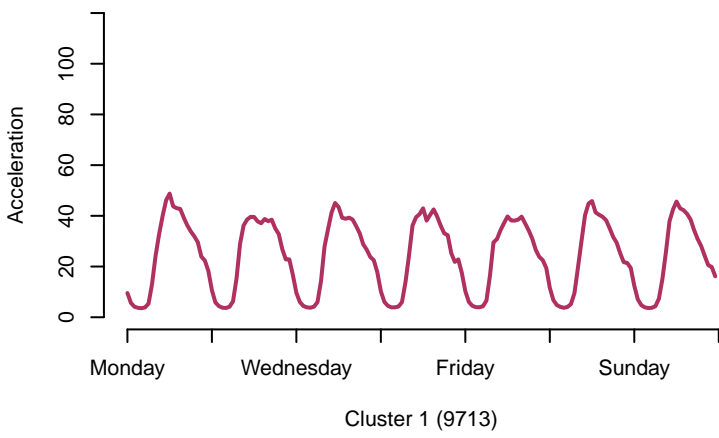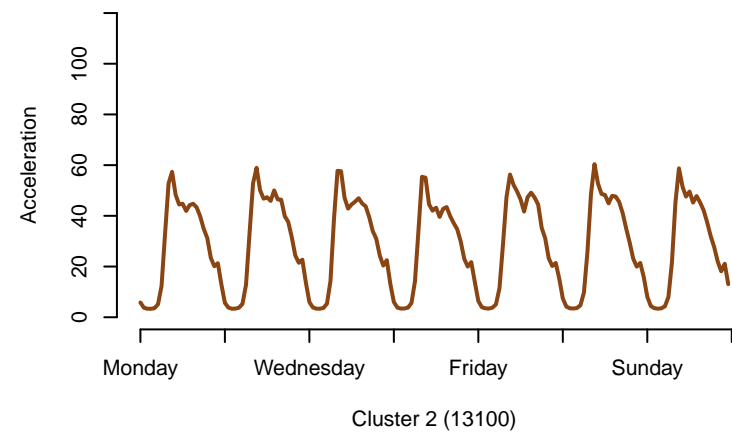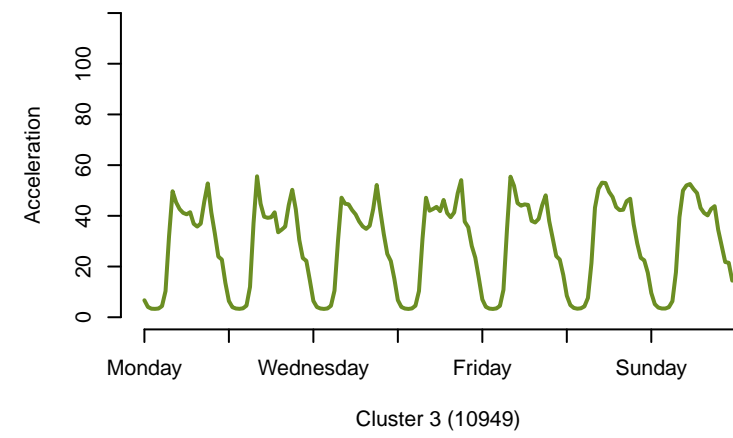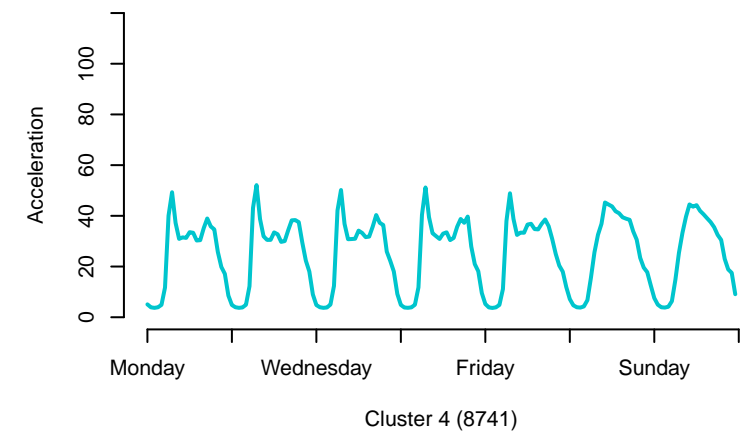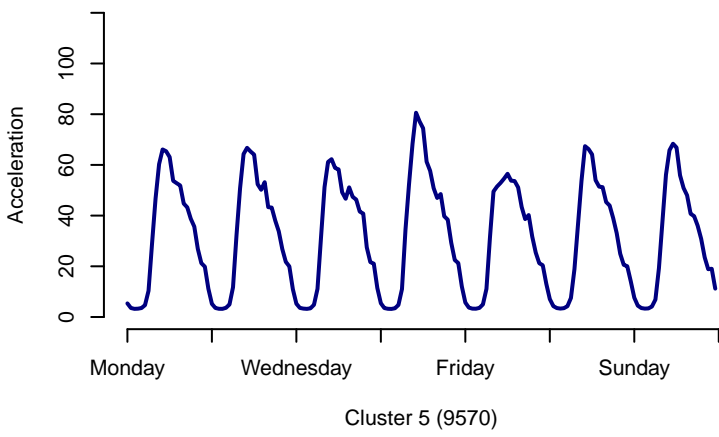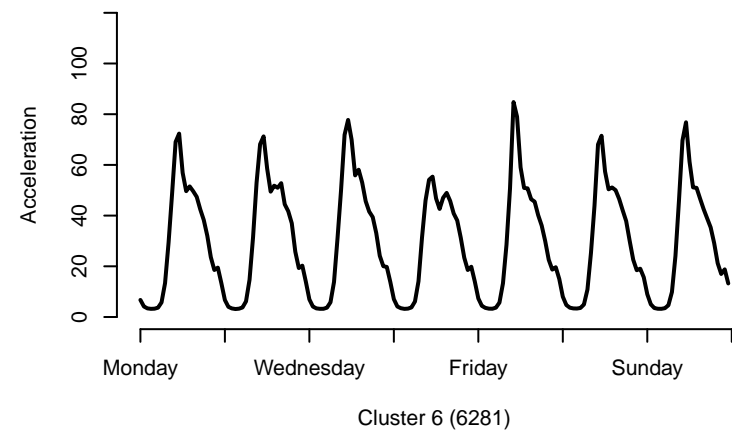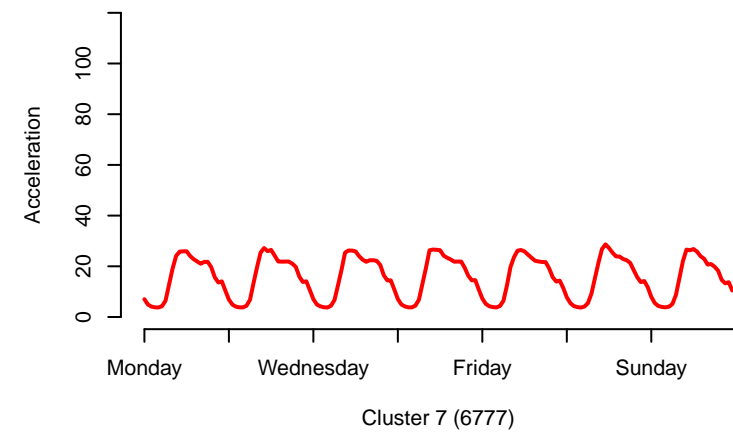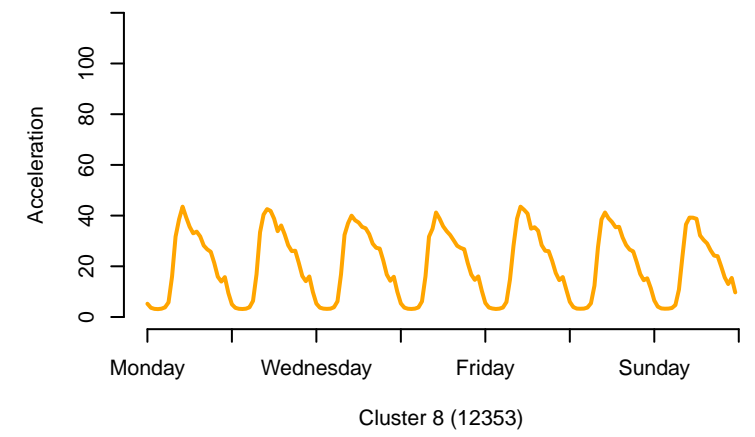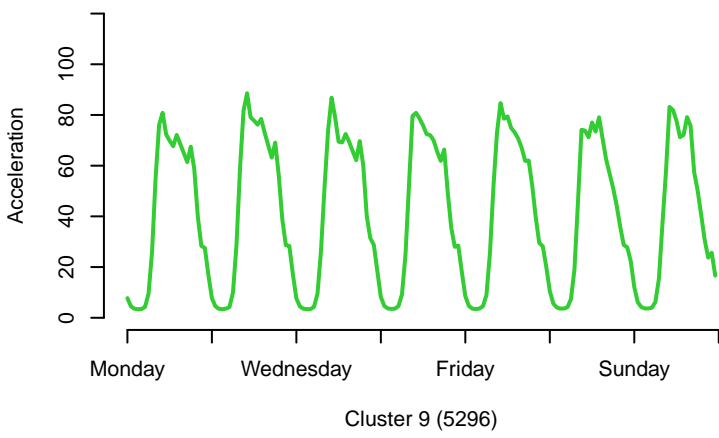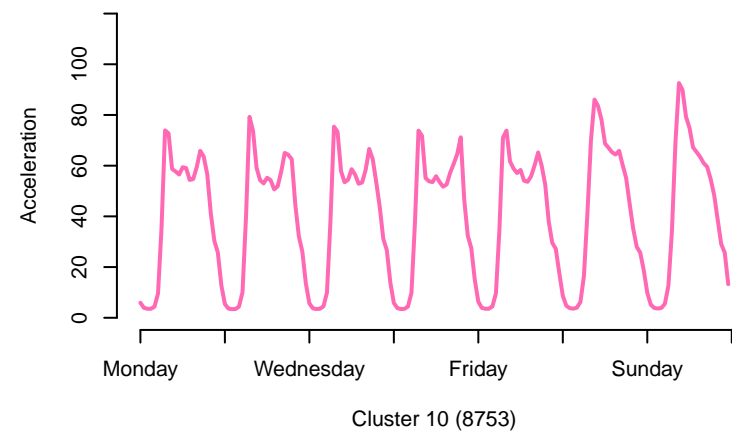

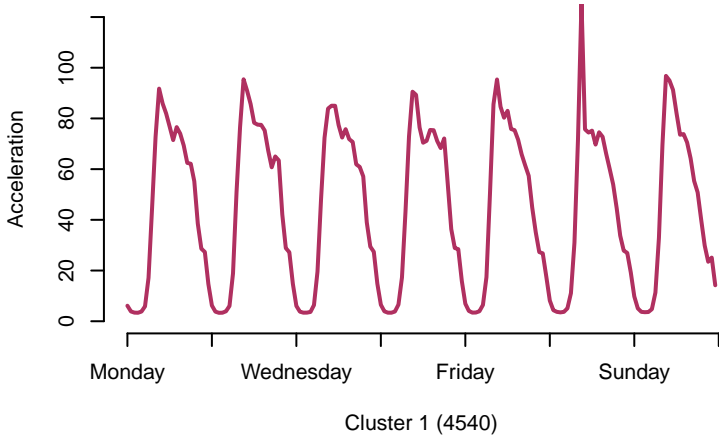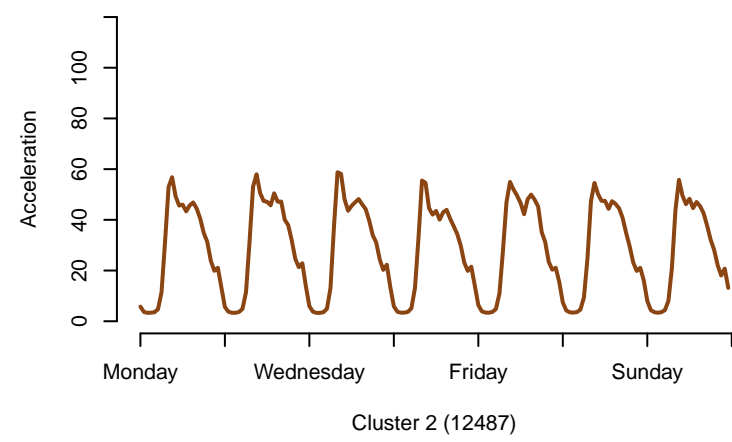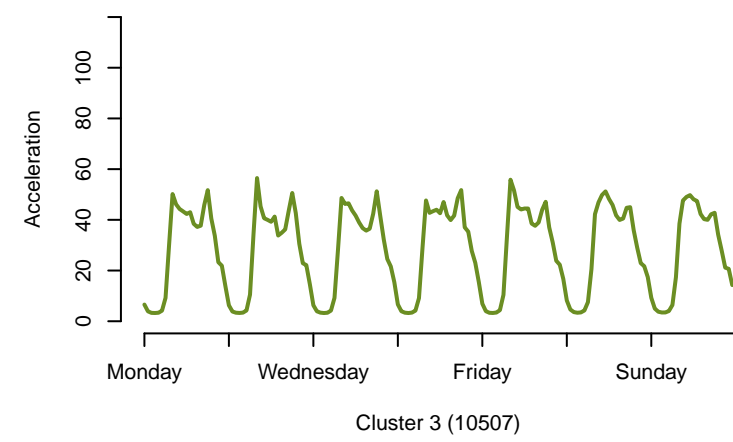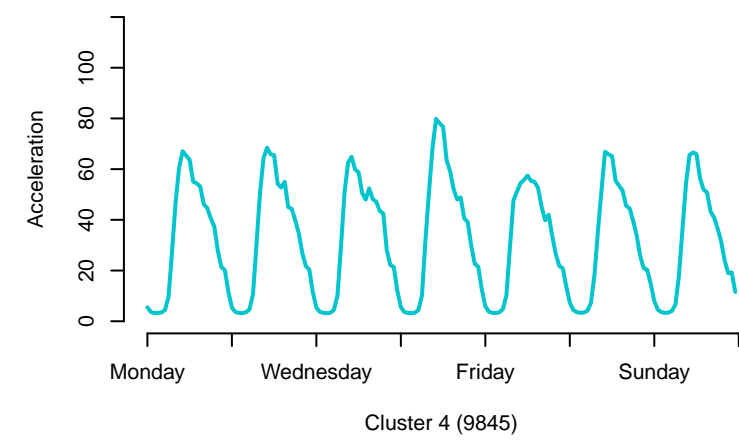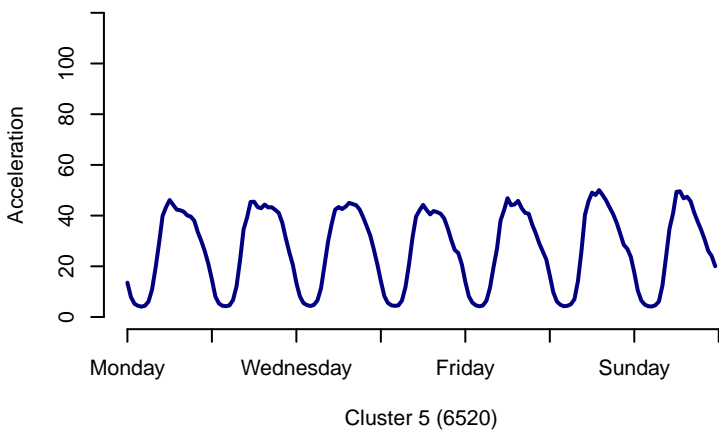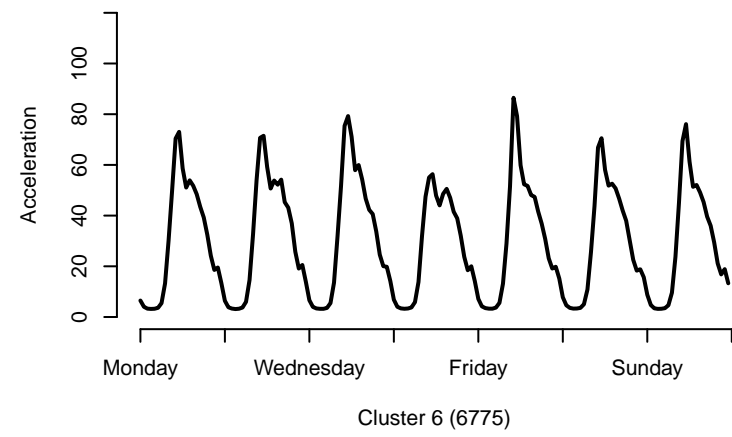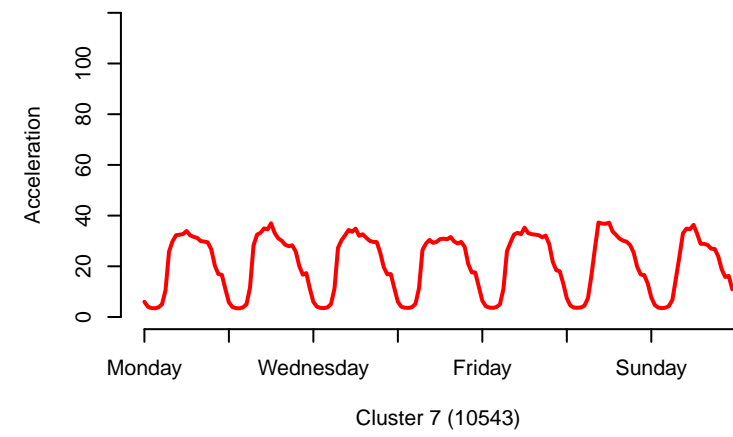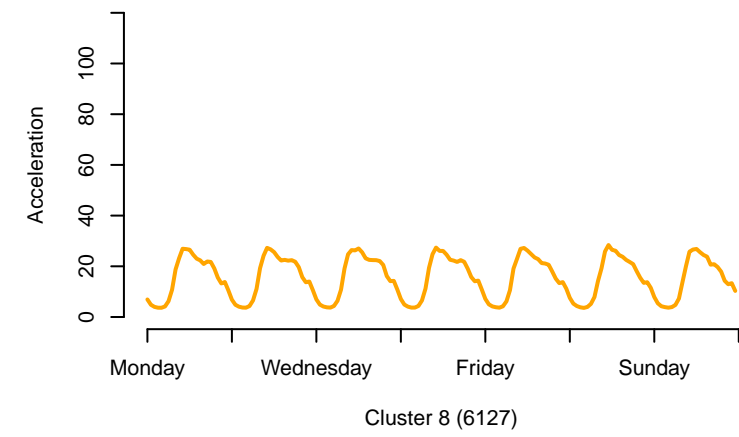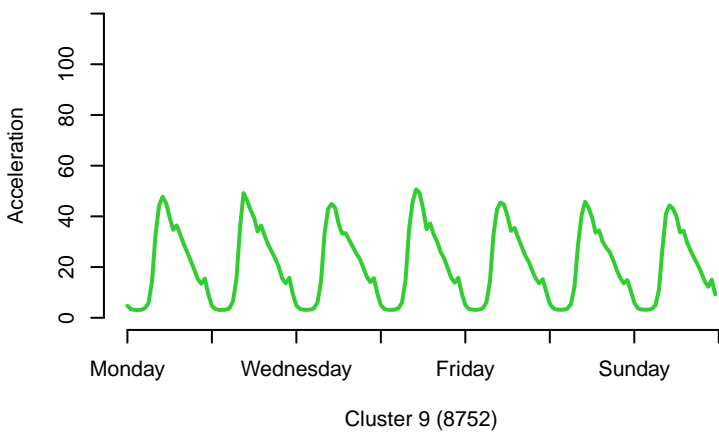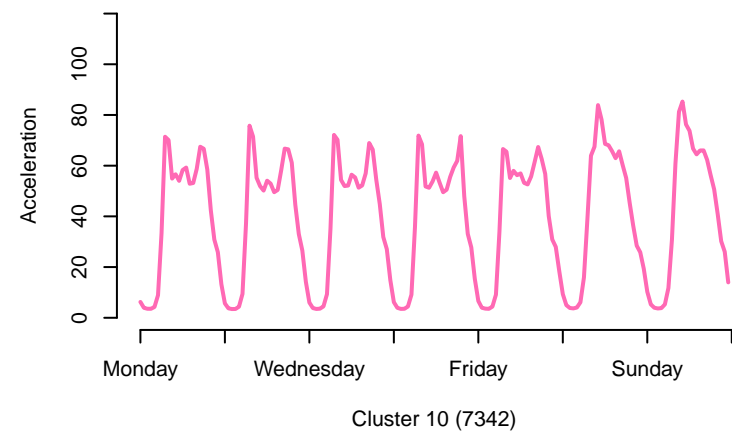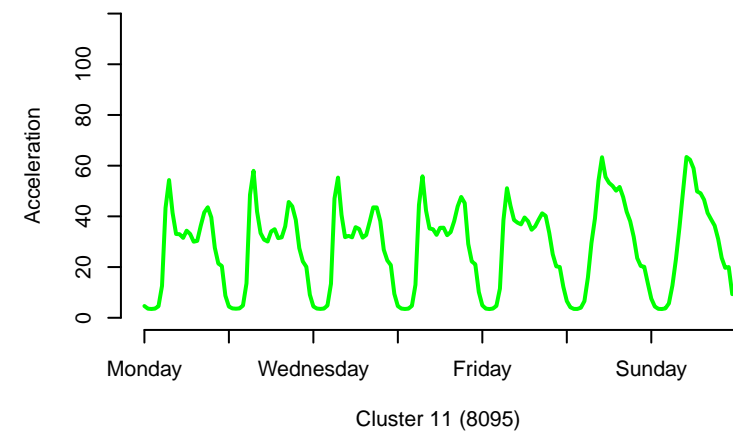

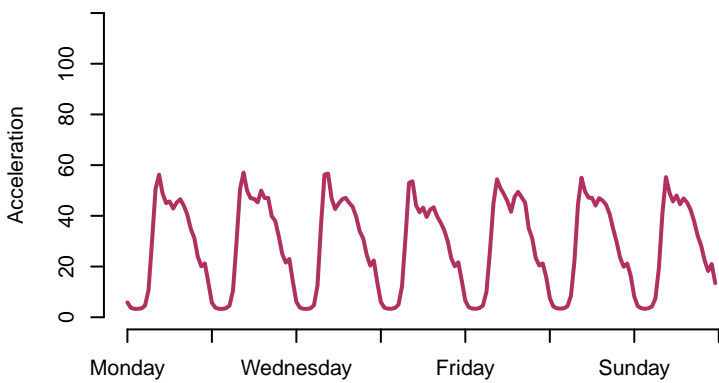

Cluster 1 (11556)

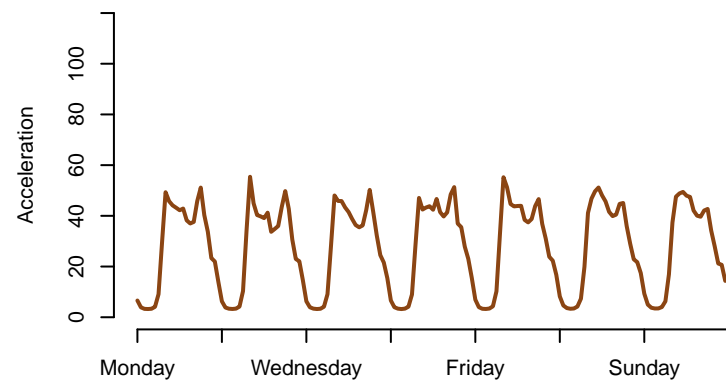

Cluster 2 (10188)

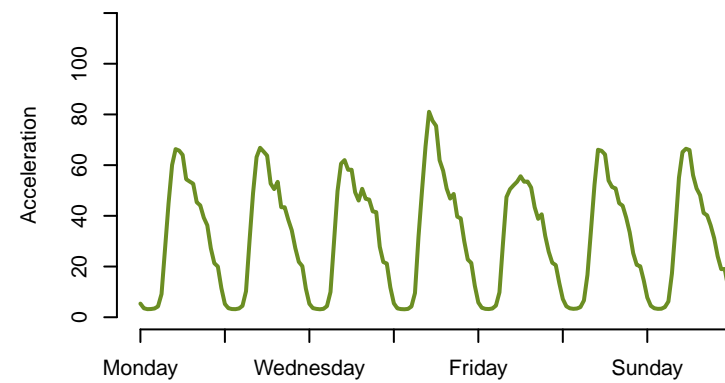

Cluster 3 (8396)

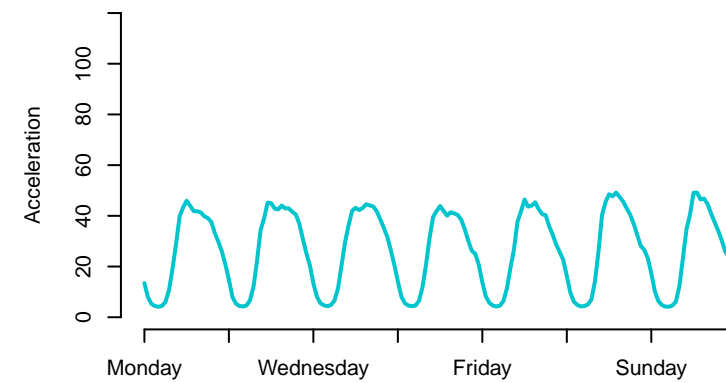

Cluster 4 (6400)

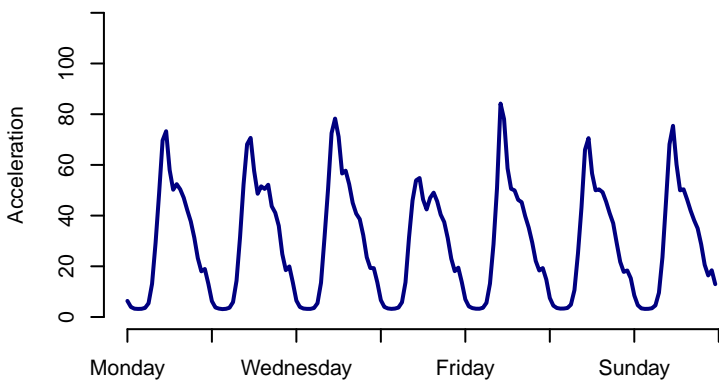

Cluster 5 (6075)

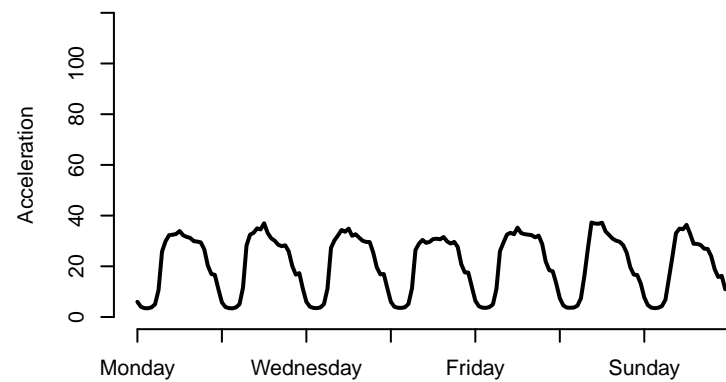

Cluster 6 (10543)

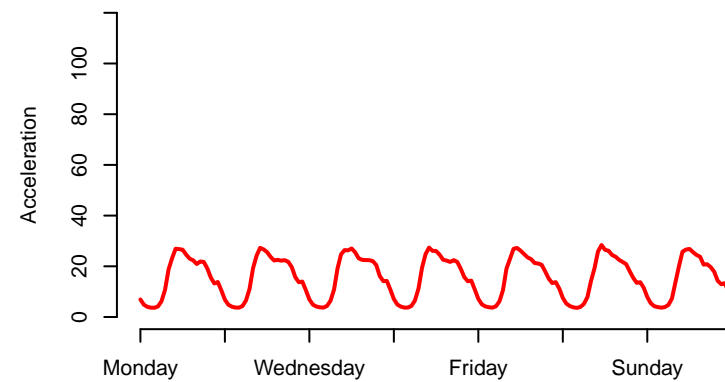

Cluster 7 (6127)

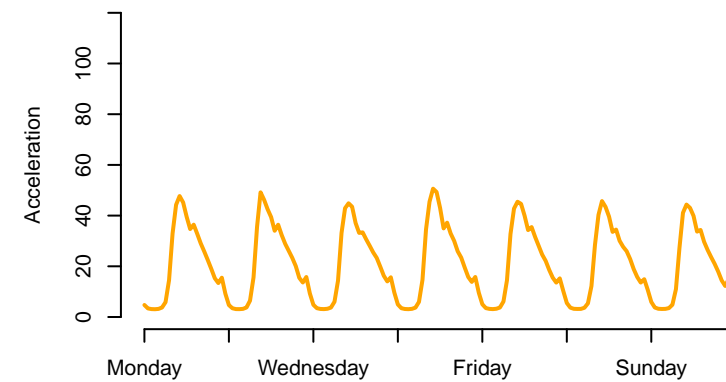

Cluster 8 (8750)

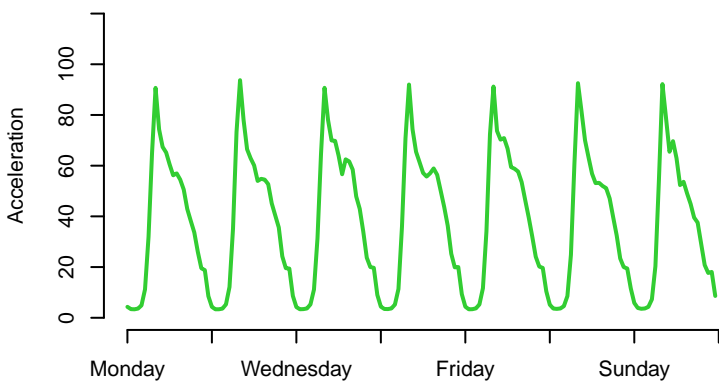

Cluster 9 (4245)

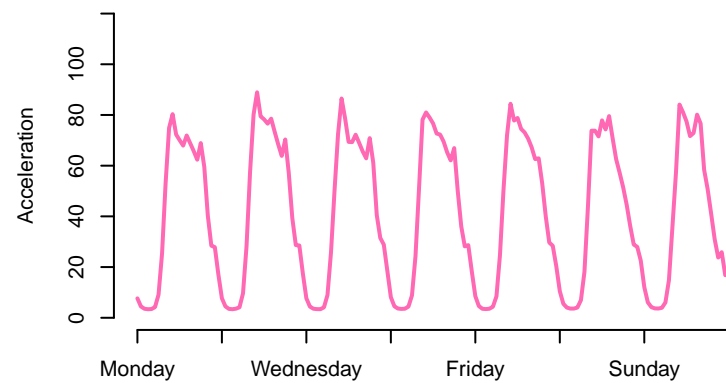

Cluster 10 (4947)

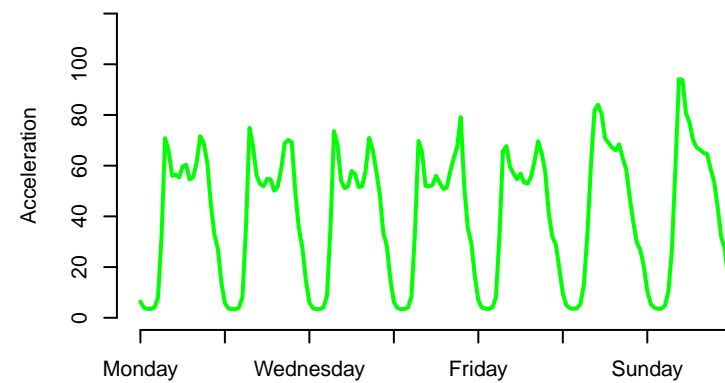

Cluster 11 (6424)

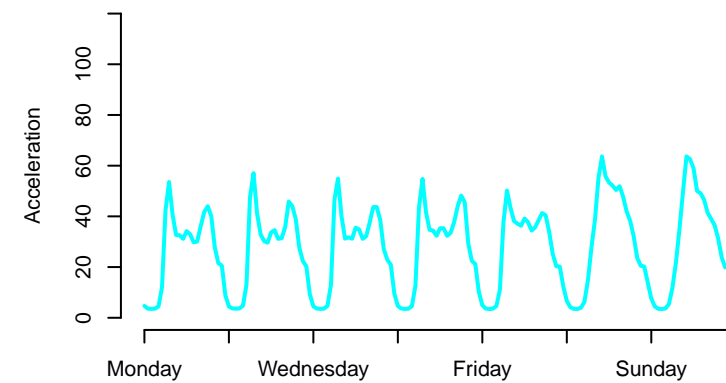

Cluster 12 (7882)

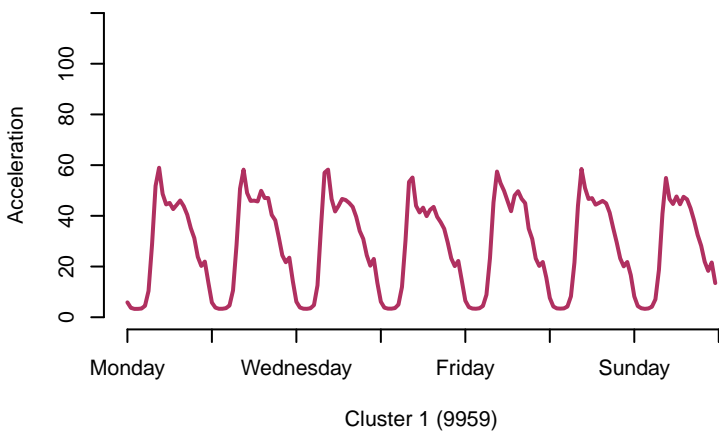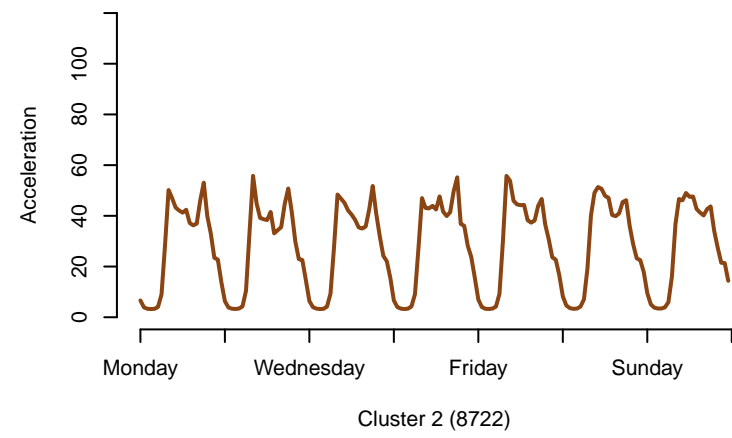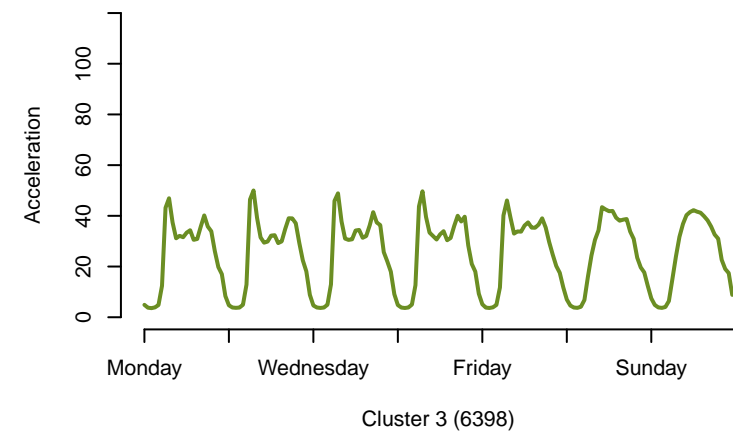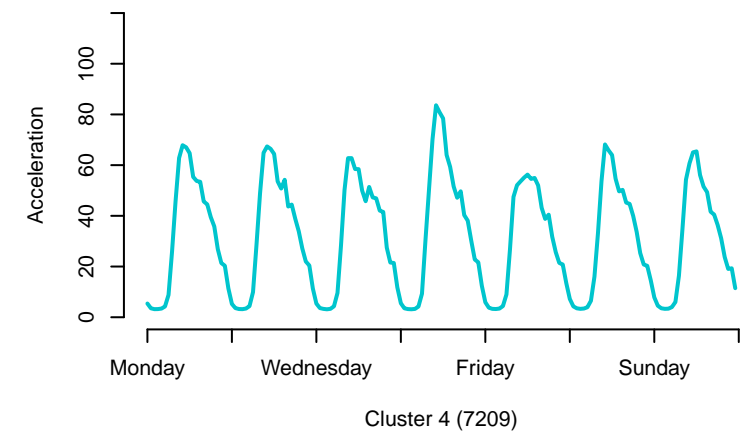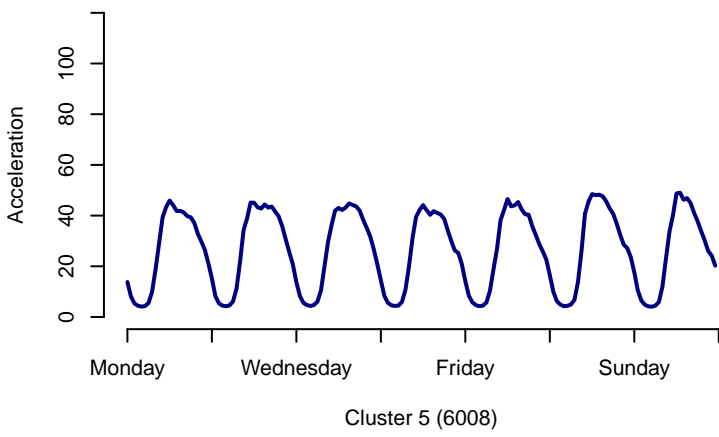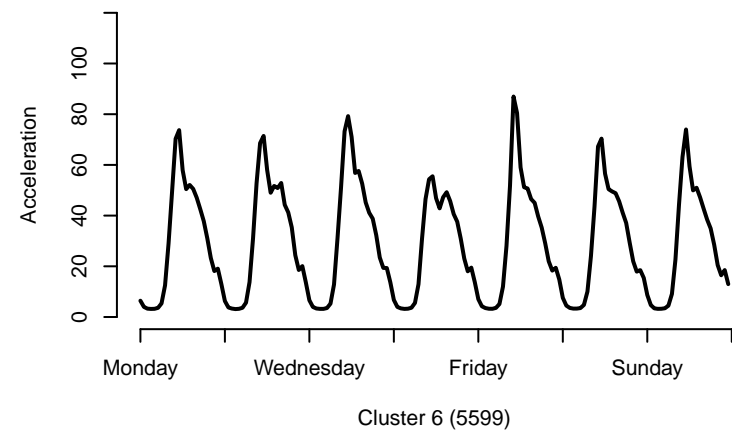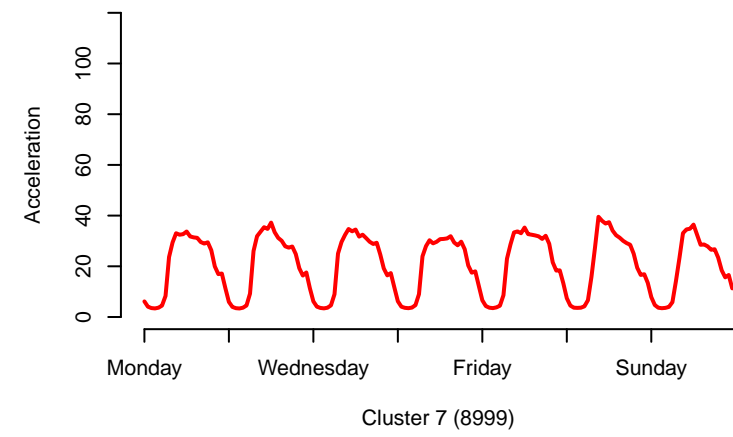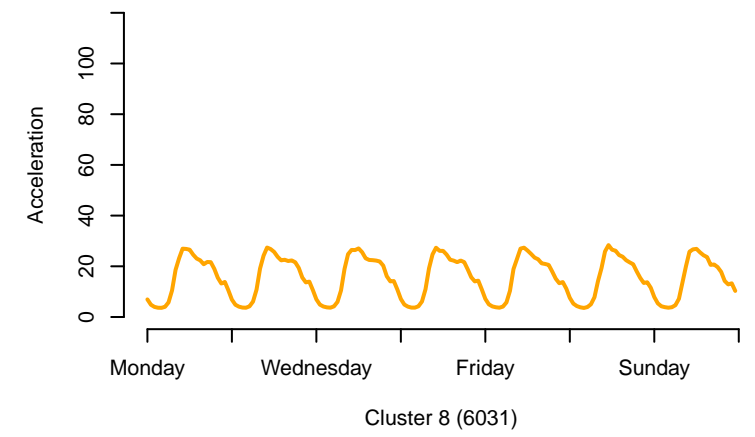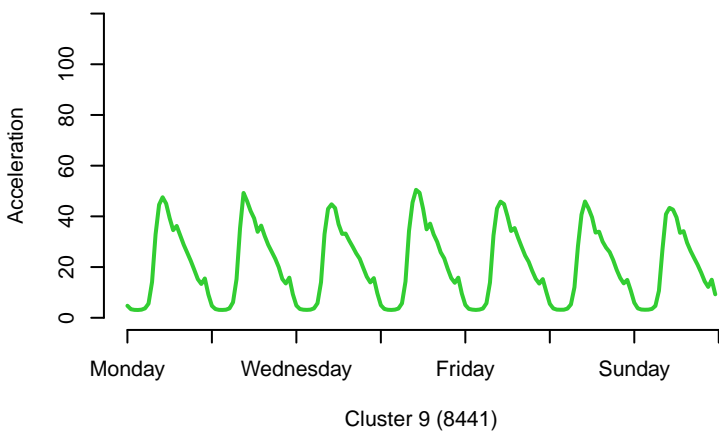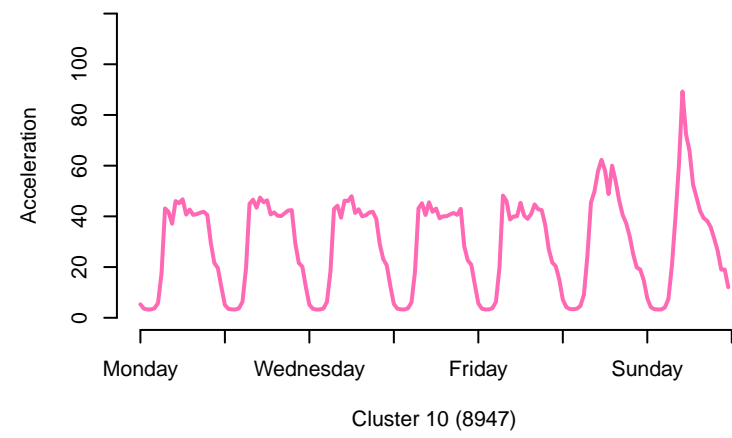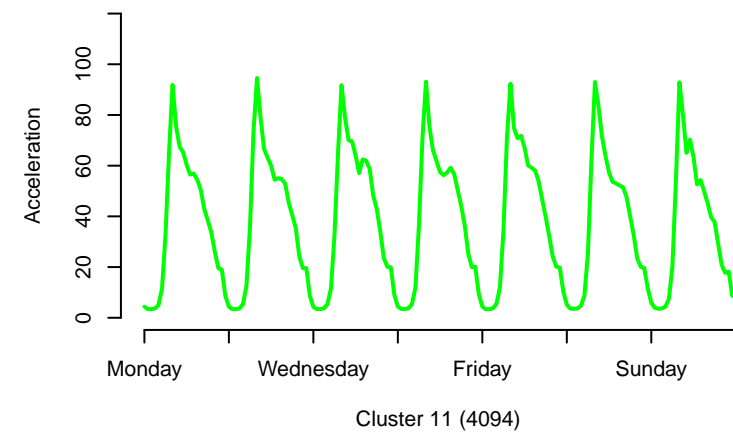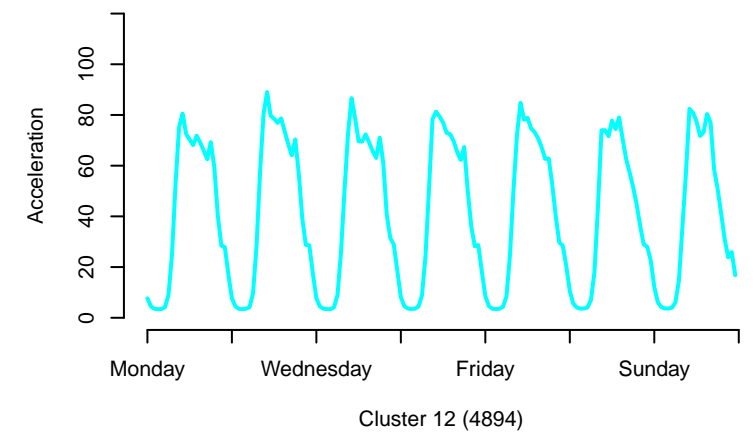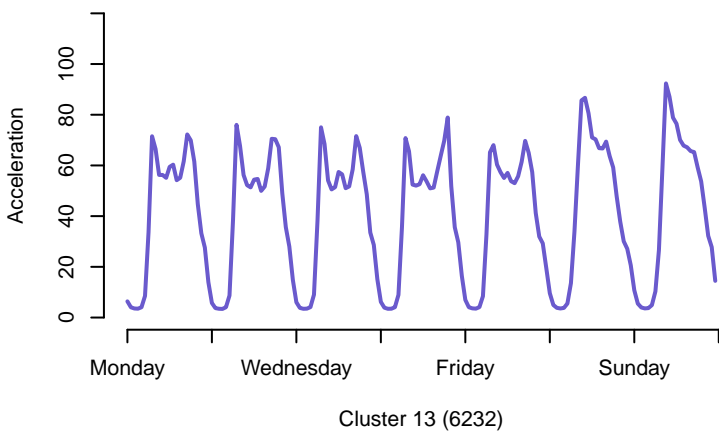

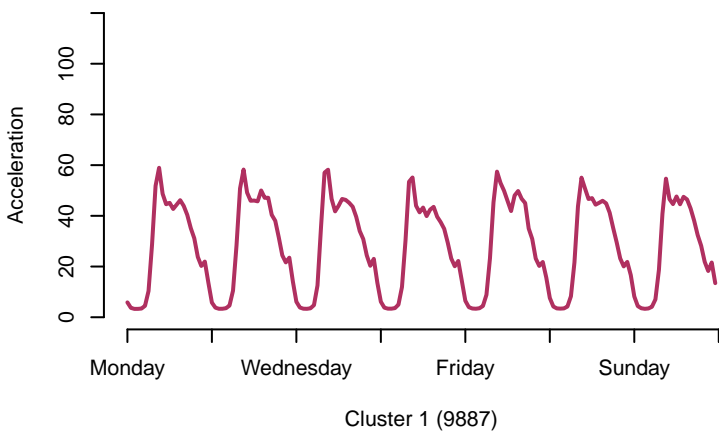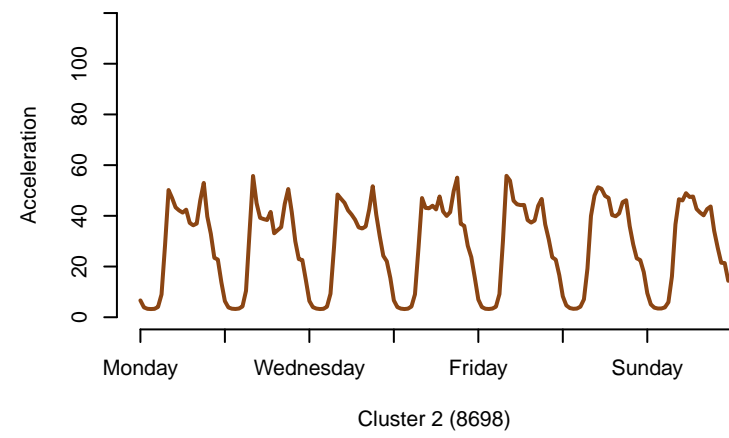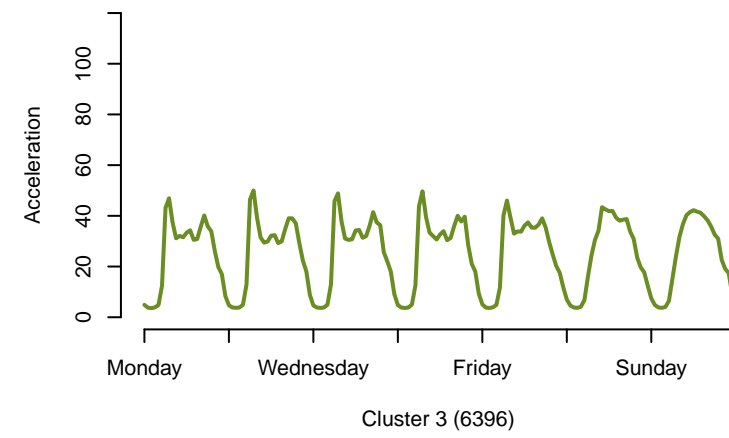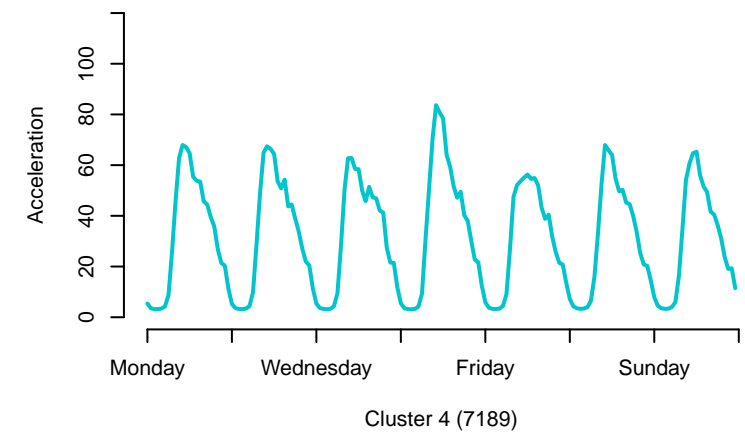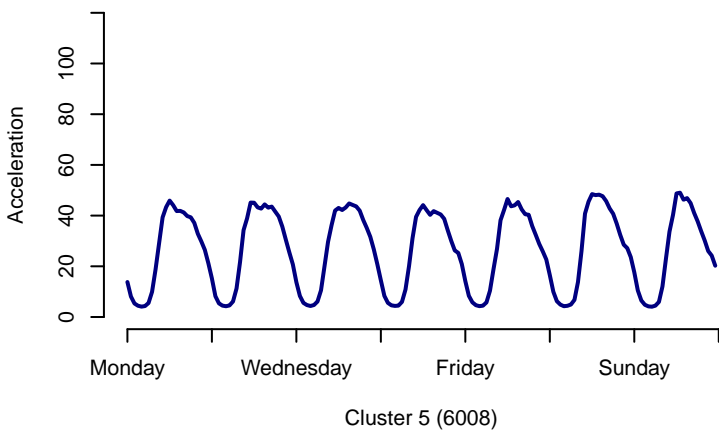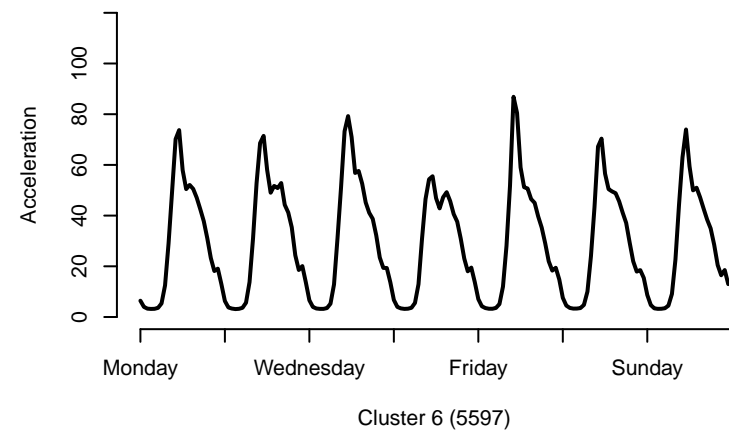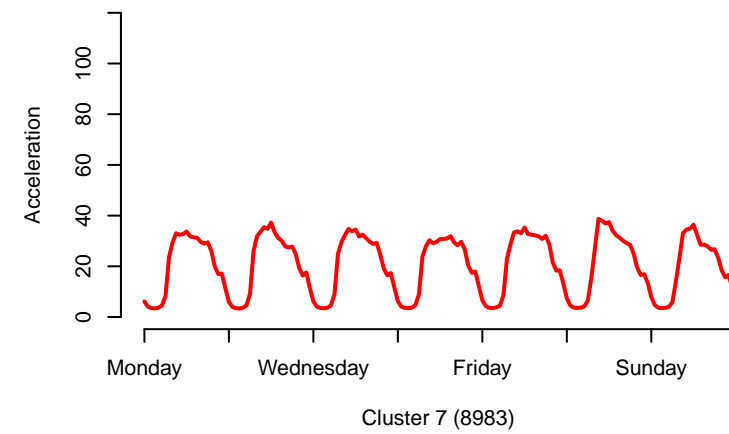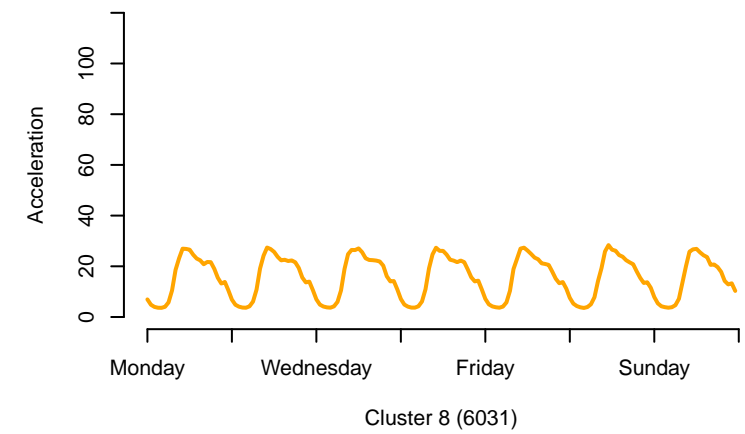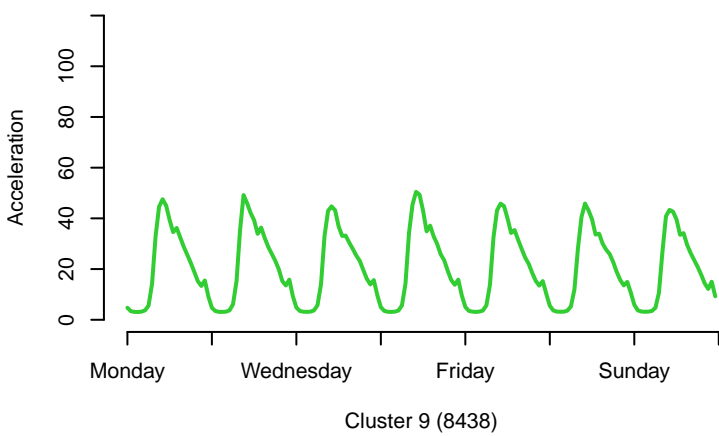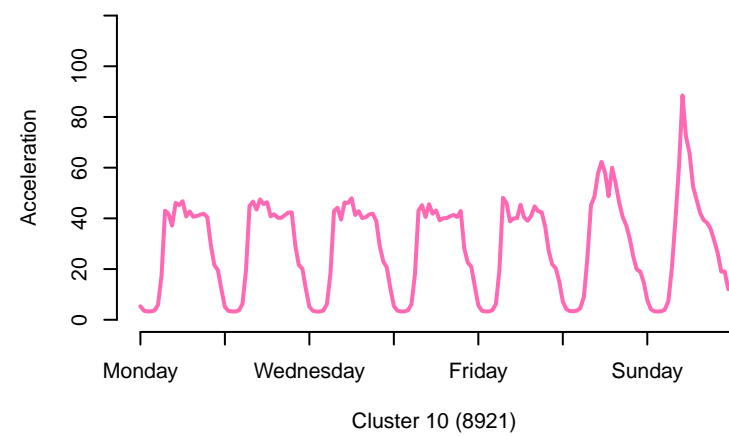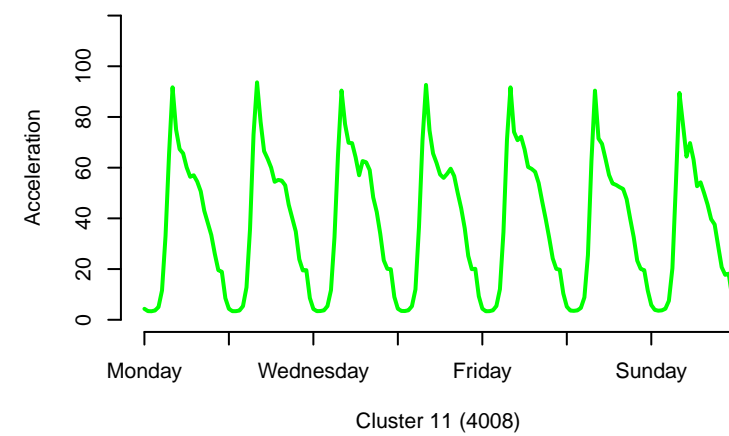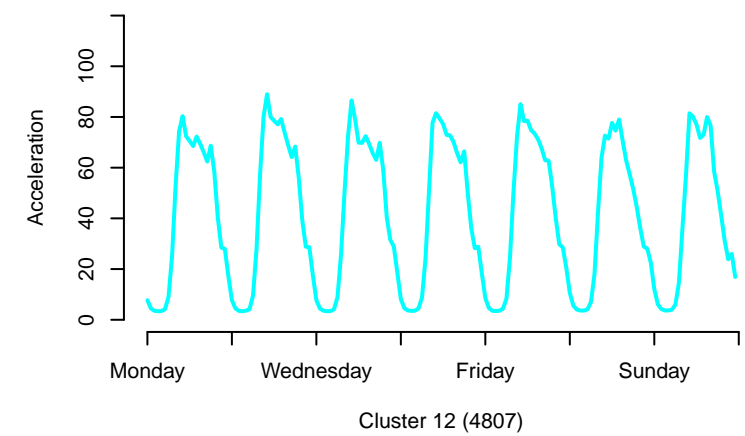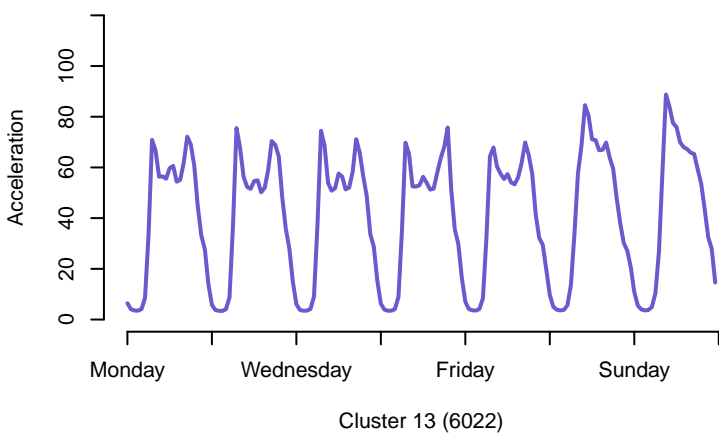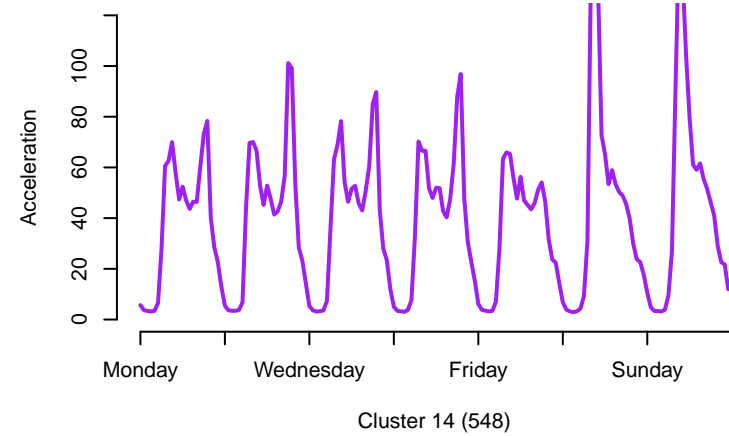

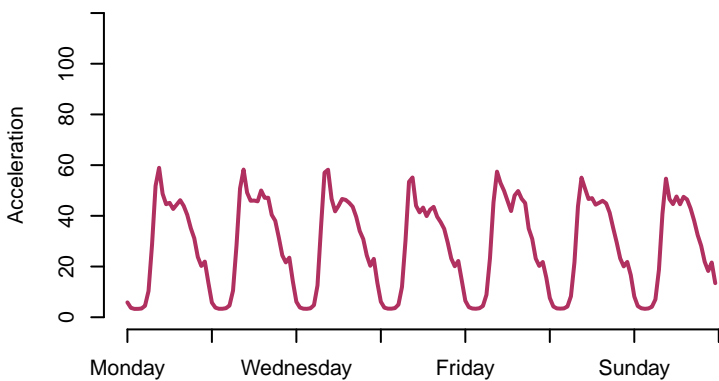

Cluster 1 (9887)

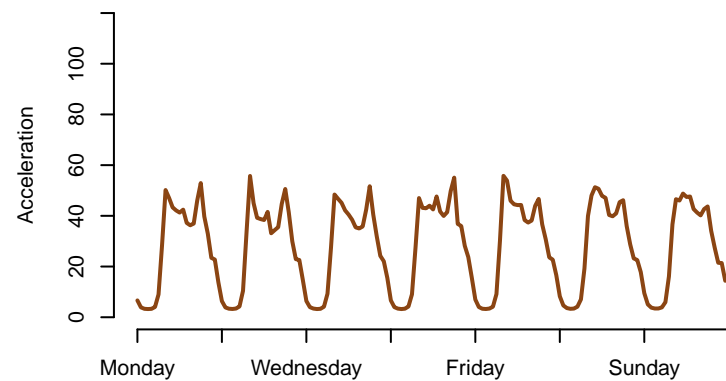

Cluster 2 (8696)

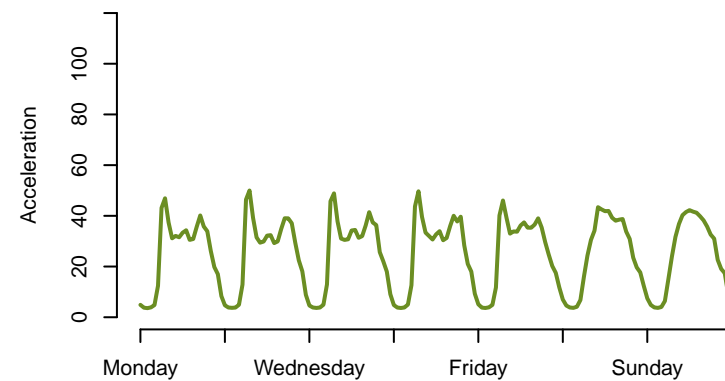

Cluster 3 (6396)

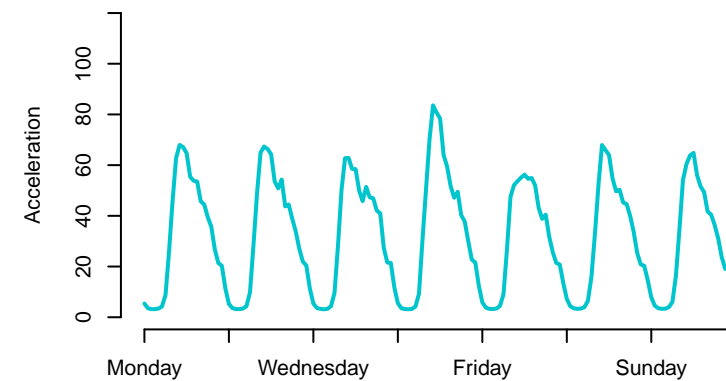

Cluster 4 (7182)

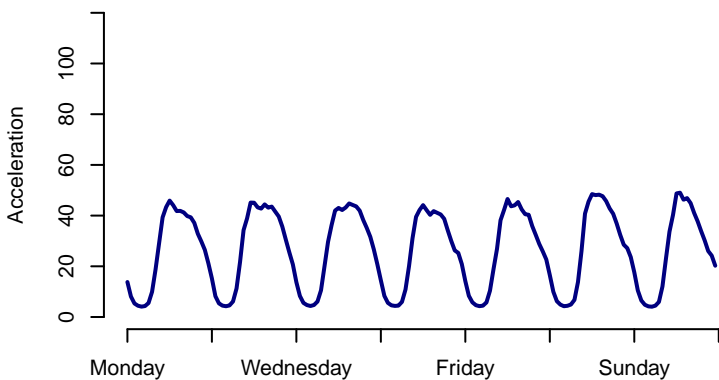

Cluster 5 (6008)

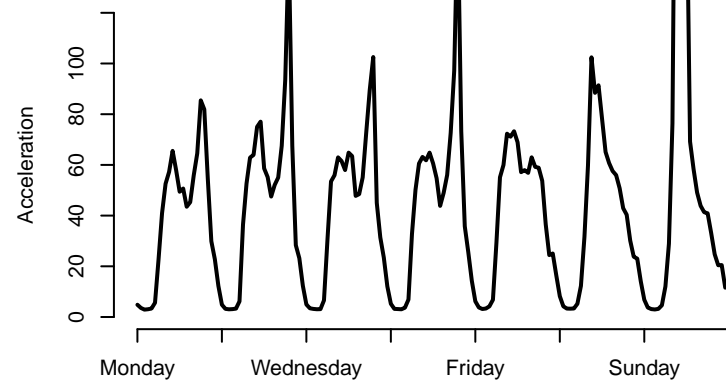

Cluster 6 (315)

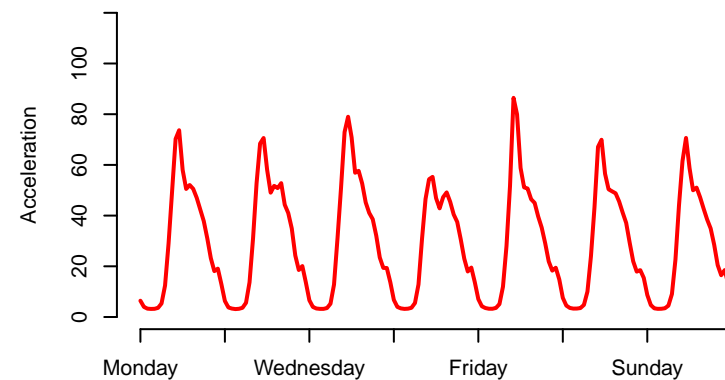

Cluster 7 (5571)

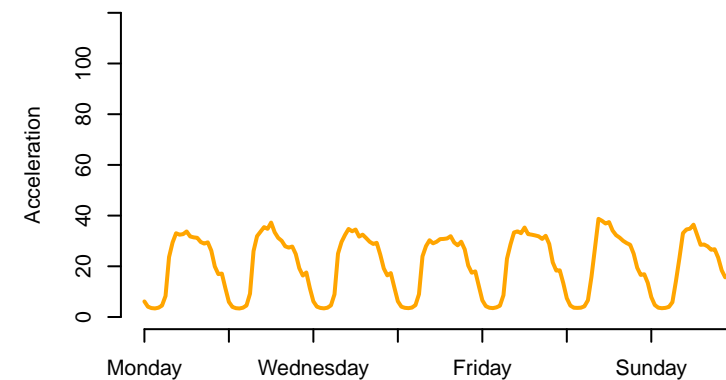

Cluster 8 (8983)

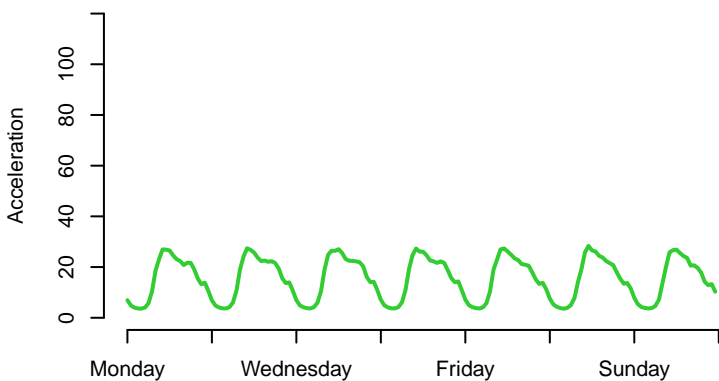

Cluster 9 (6031)

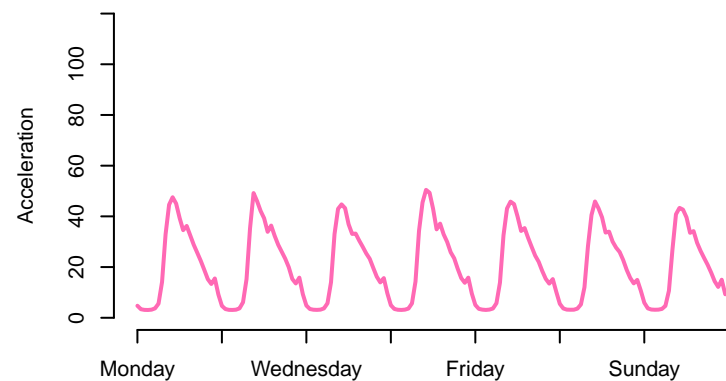

Cluster 10 (8438)

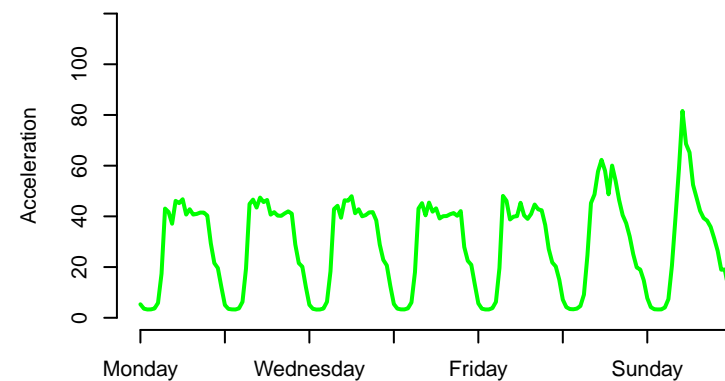

Cluster 11 (8819)

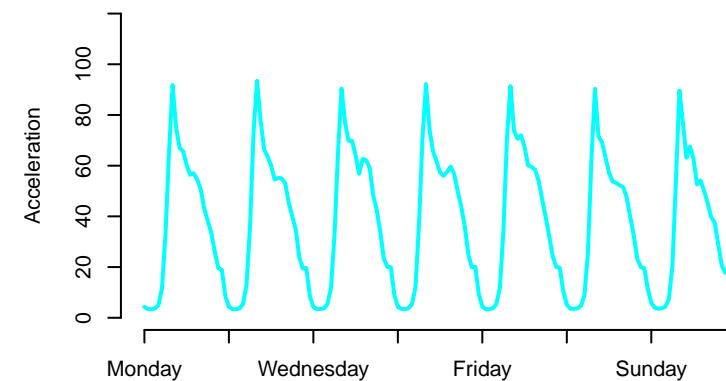

Cluster 12 (3994)

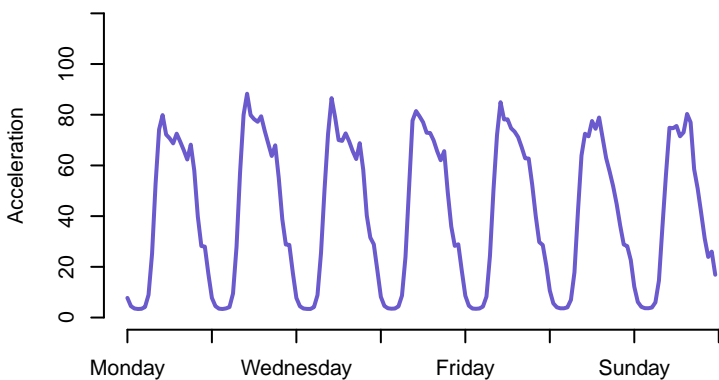

Cluster 13 (4748)

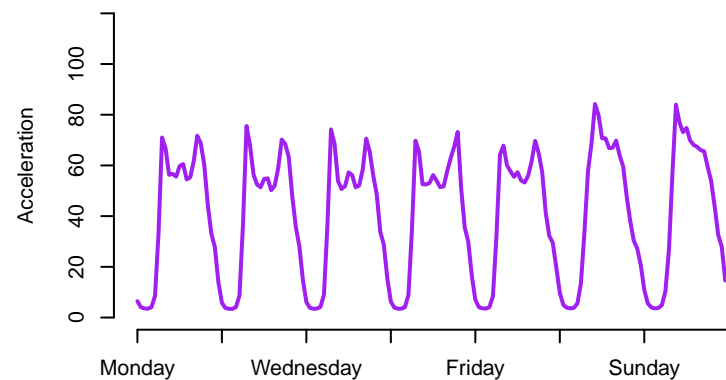

Cluster 14 (5946)

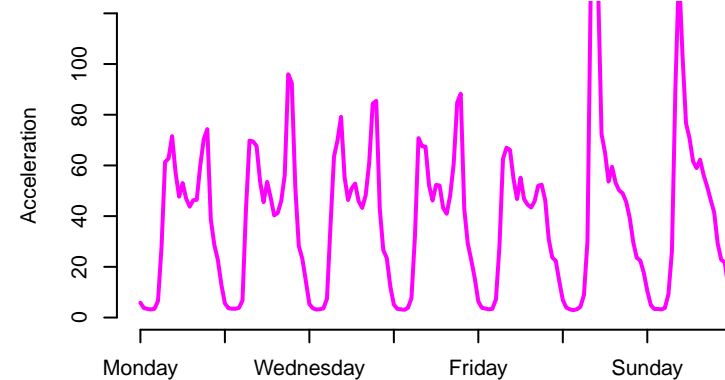

Cluster 15 (519)

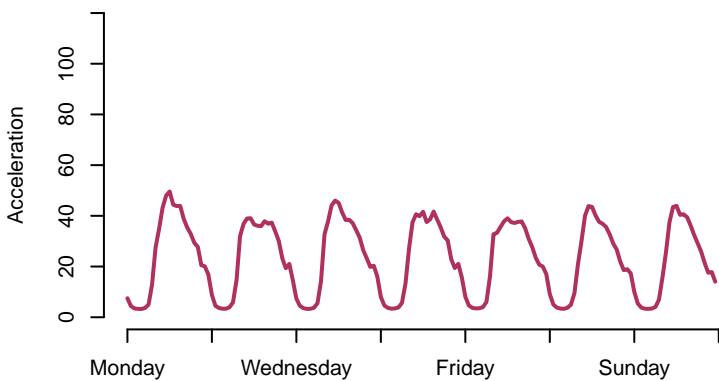

Cluster 1 (6497)

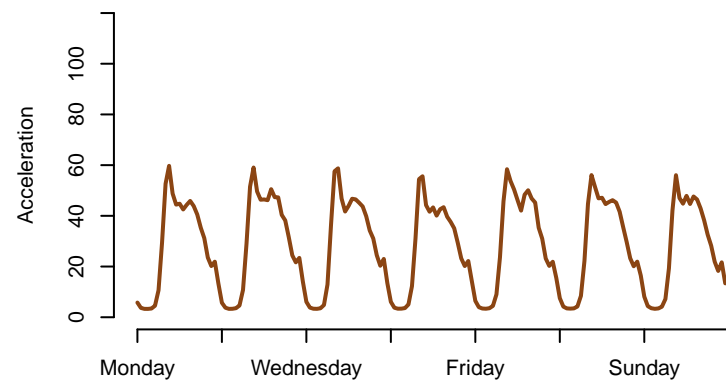

Cluster 2 (9338)

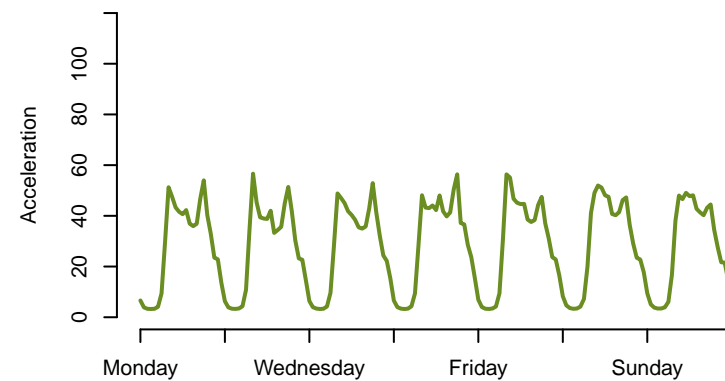

Cluster 3 (8010)

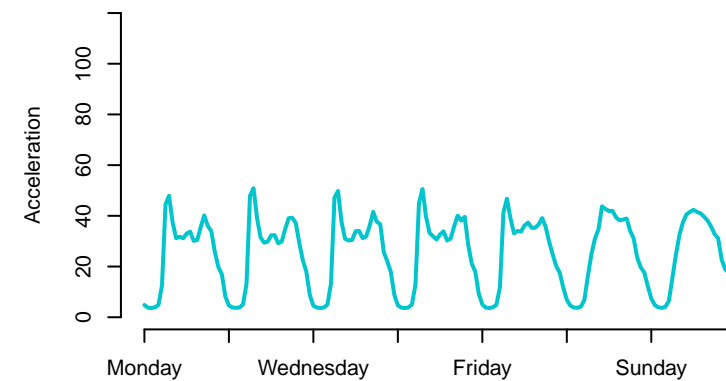

Cluster 4 (6121)

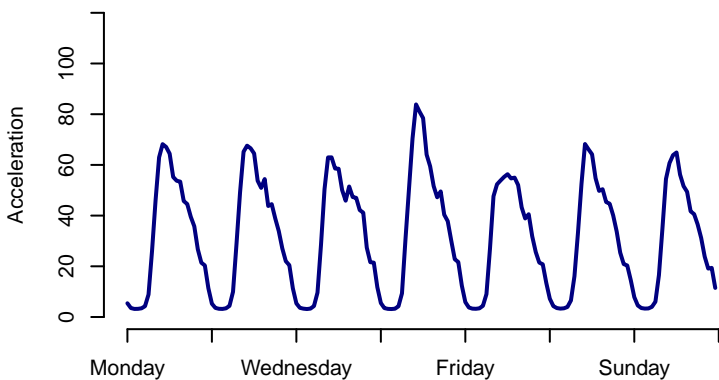

Cluster 5 (7095)

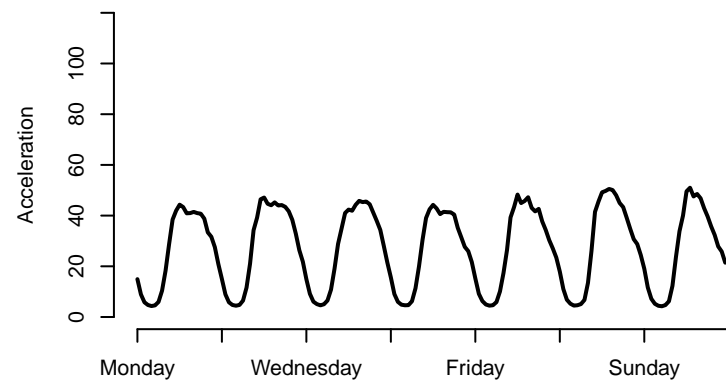

Cluster 6 (4563)

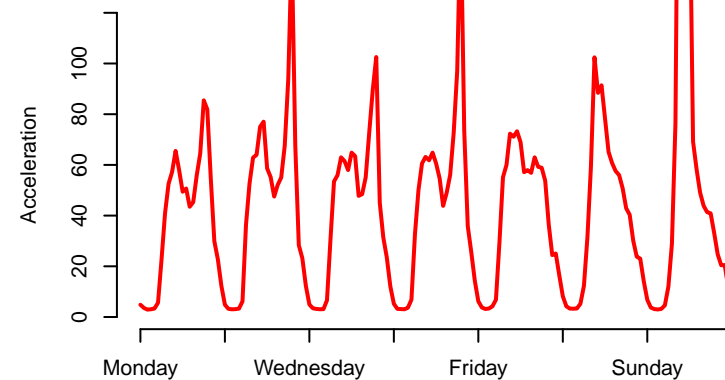

Cluster 7 (315)

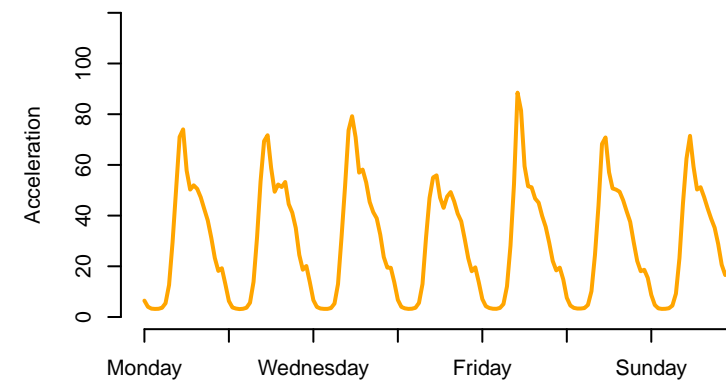

Cluster 8 (5292)

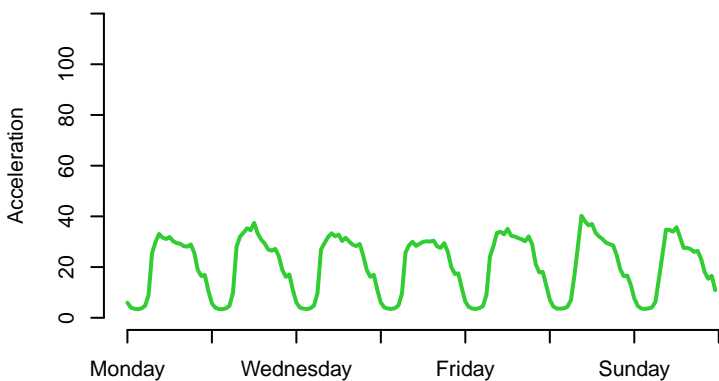

Cluster 9 (7520)

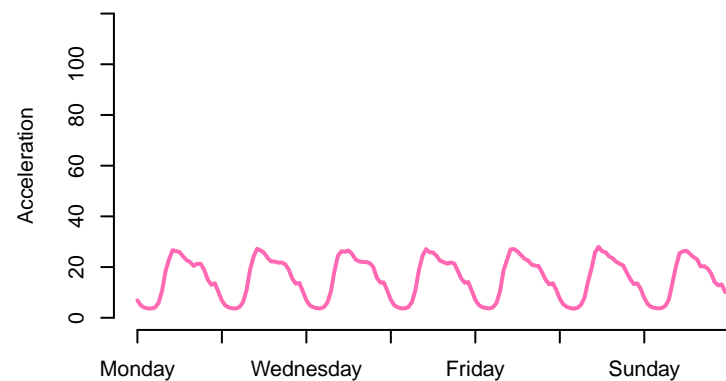

Cluster 10 (5800)

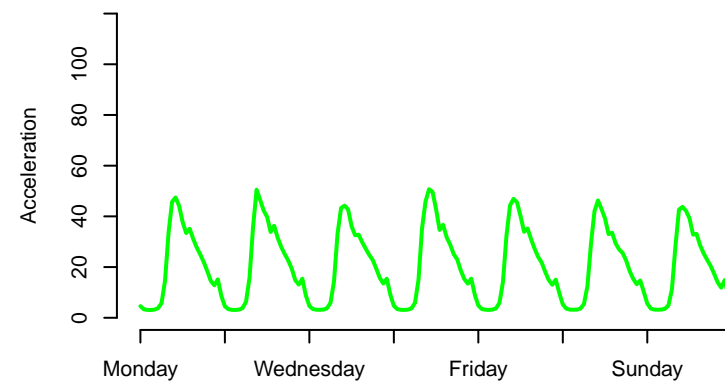

Cluster 11 (7377)

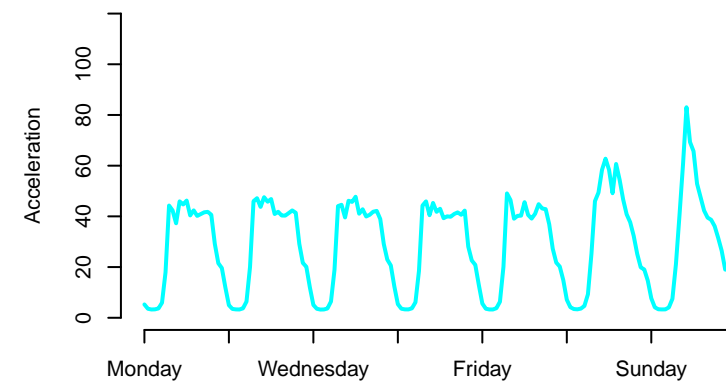

Cluster 12 (8398)

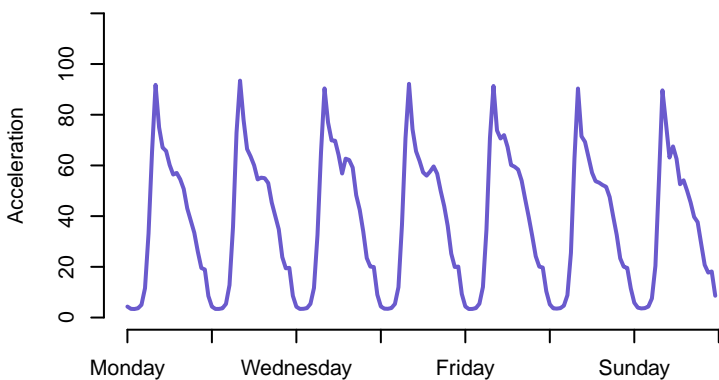

Cluster 13 (3994)

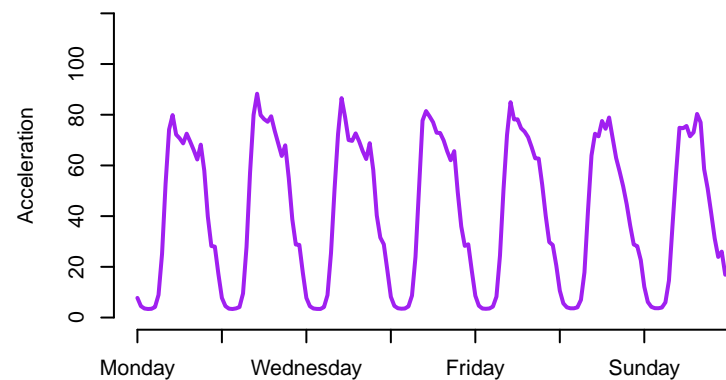

Cluster 14 (4748)

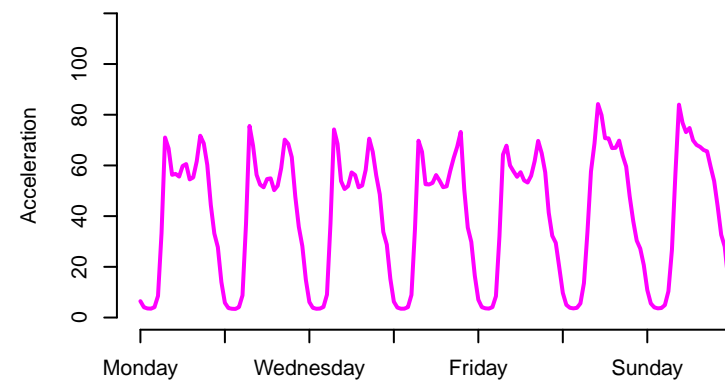

Cluster 15 (5946)

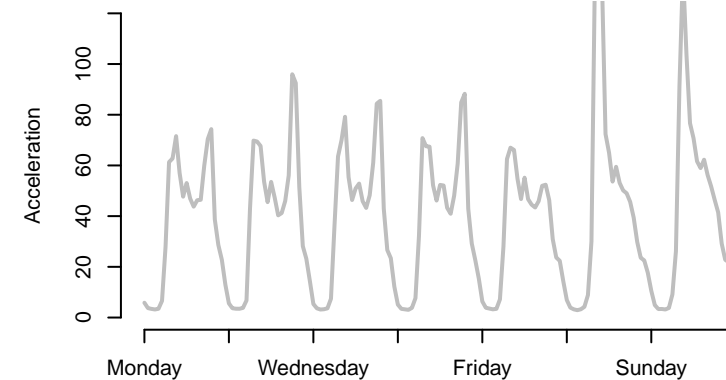

Cluster 16 (519)
