# Supplementary material for: Clustering Accelerometer Activity Patterns from the UK Biobank Cohort
Source: MDPI journal article supplement (doi:10.3390/s21248220), 2021-12-09
Supplement: s1 [file s1]

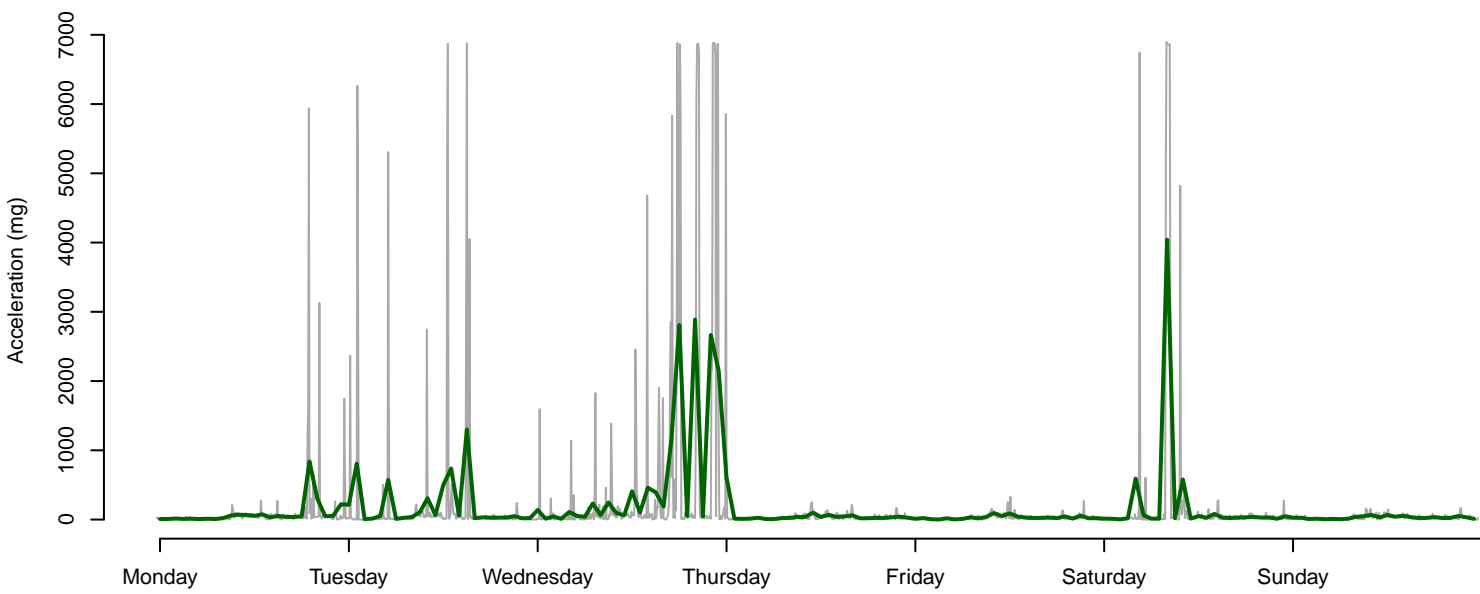

Chart S1 : Participant 1289425

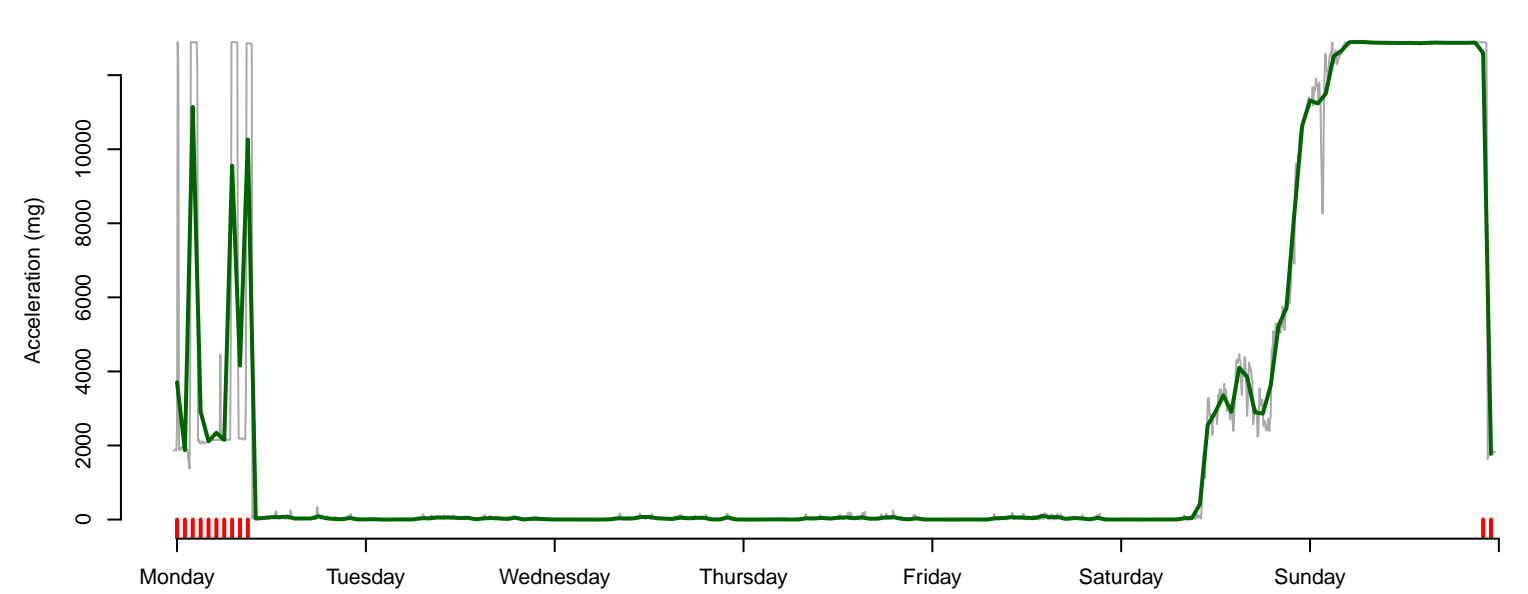

Chart S2 : Participant 1377730

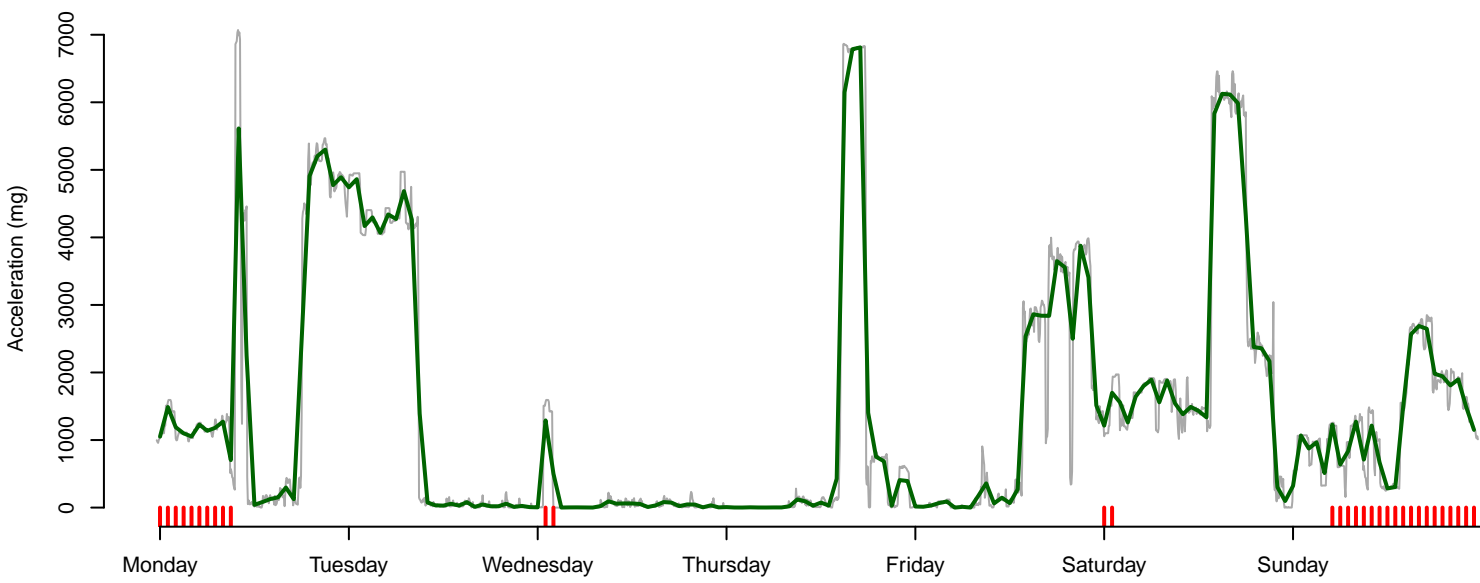

Chart S3 : Participant 1760510

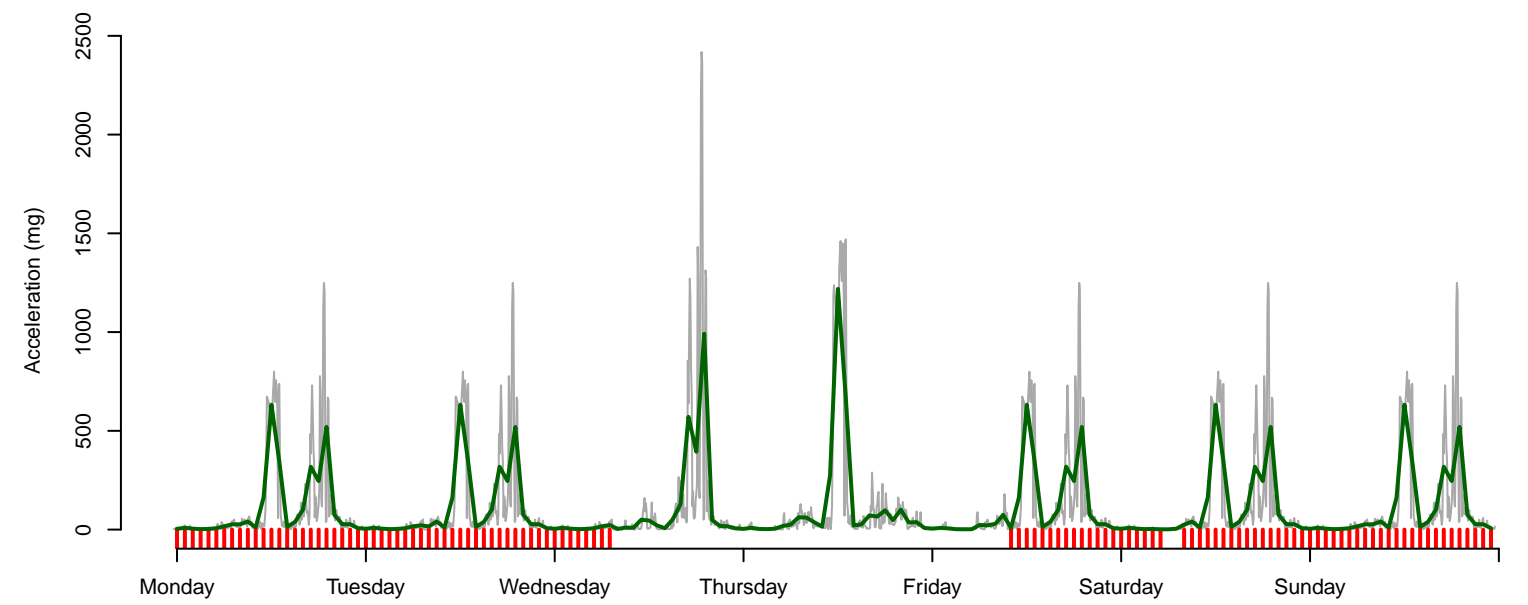

Chart S4 : Participant 1881136

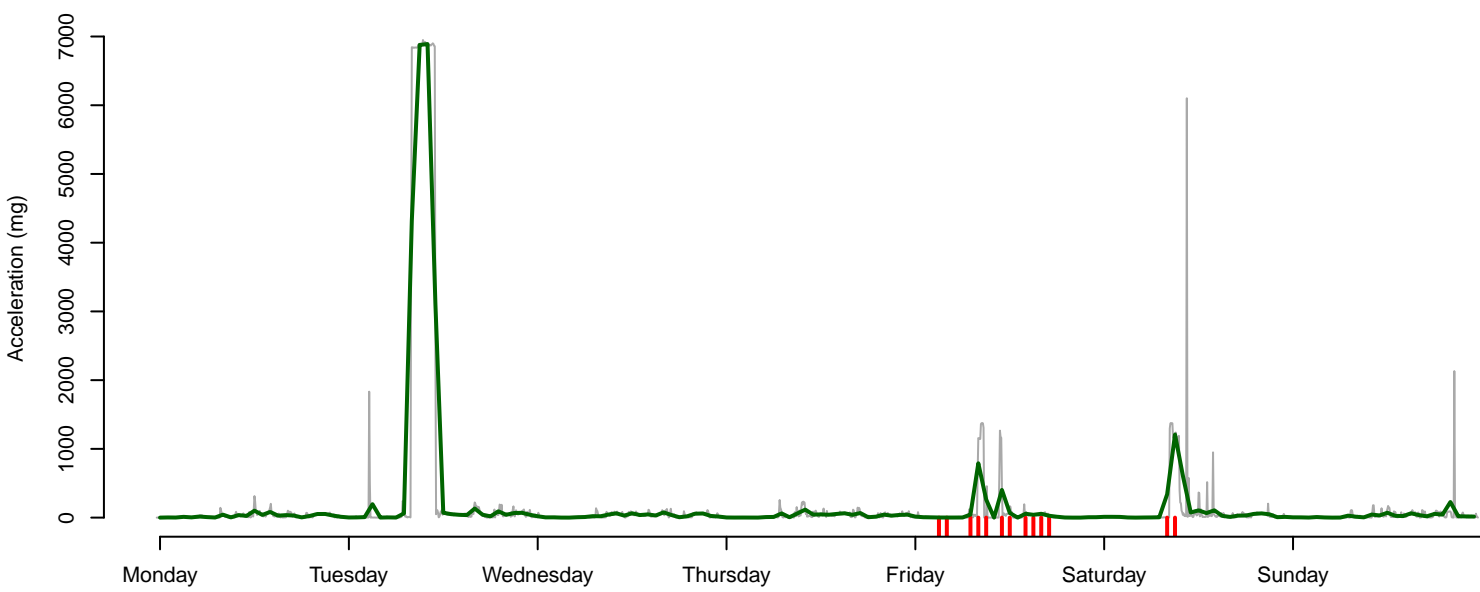

Chart S5 : Participant 3145266

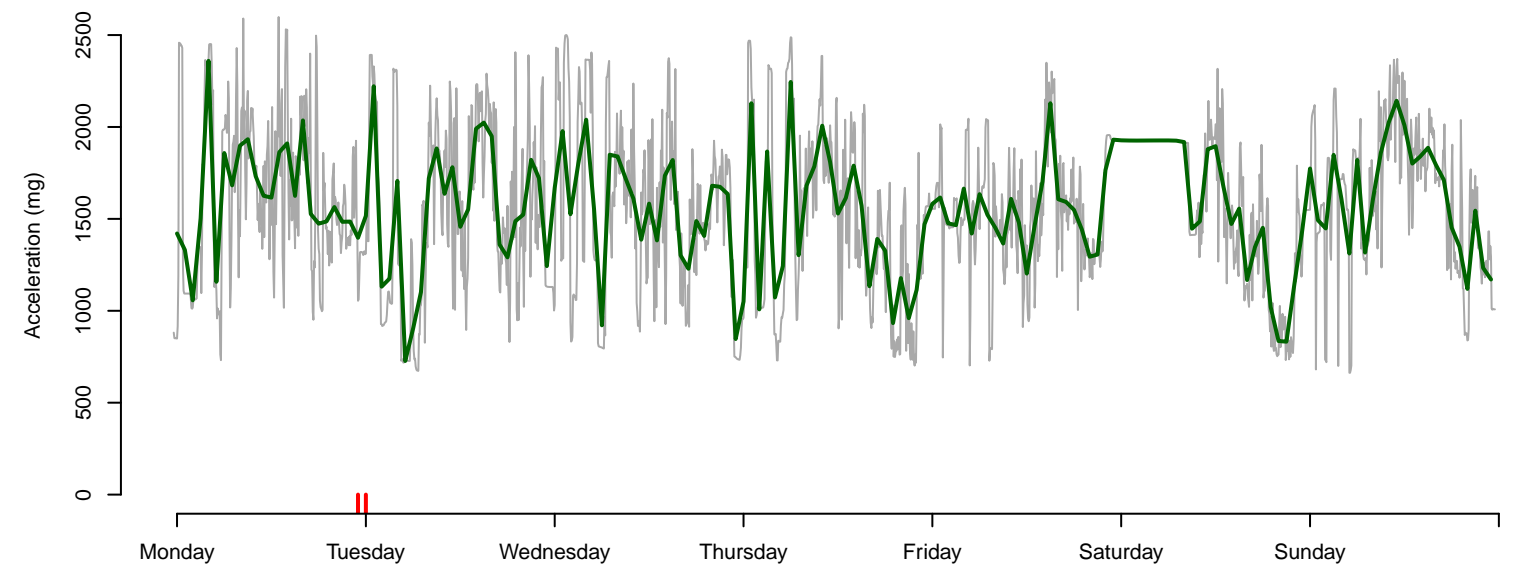

Chart S6 : Participant 3203327

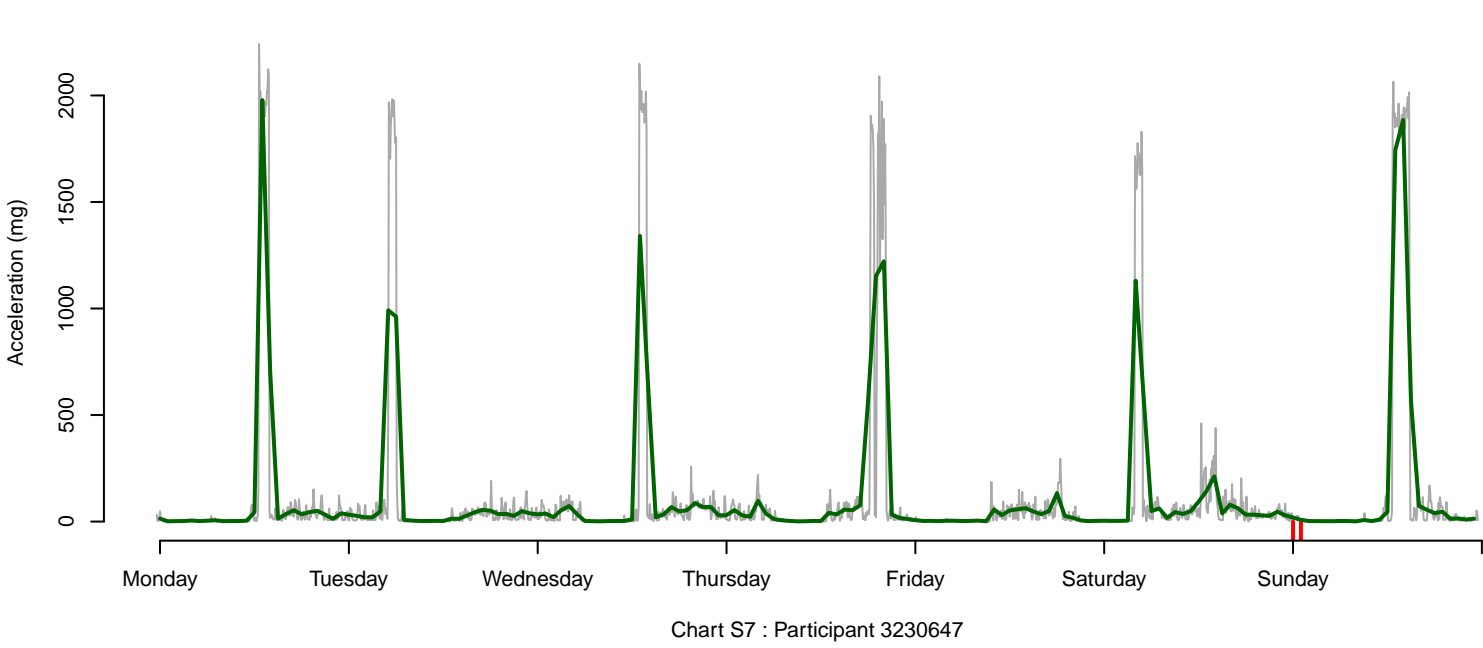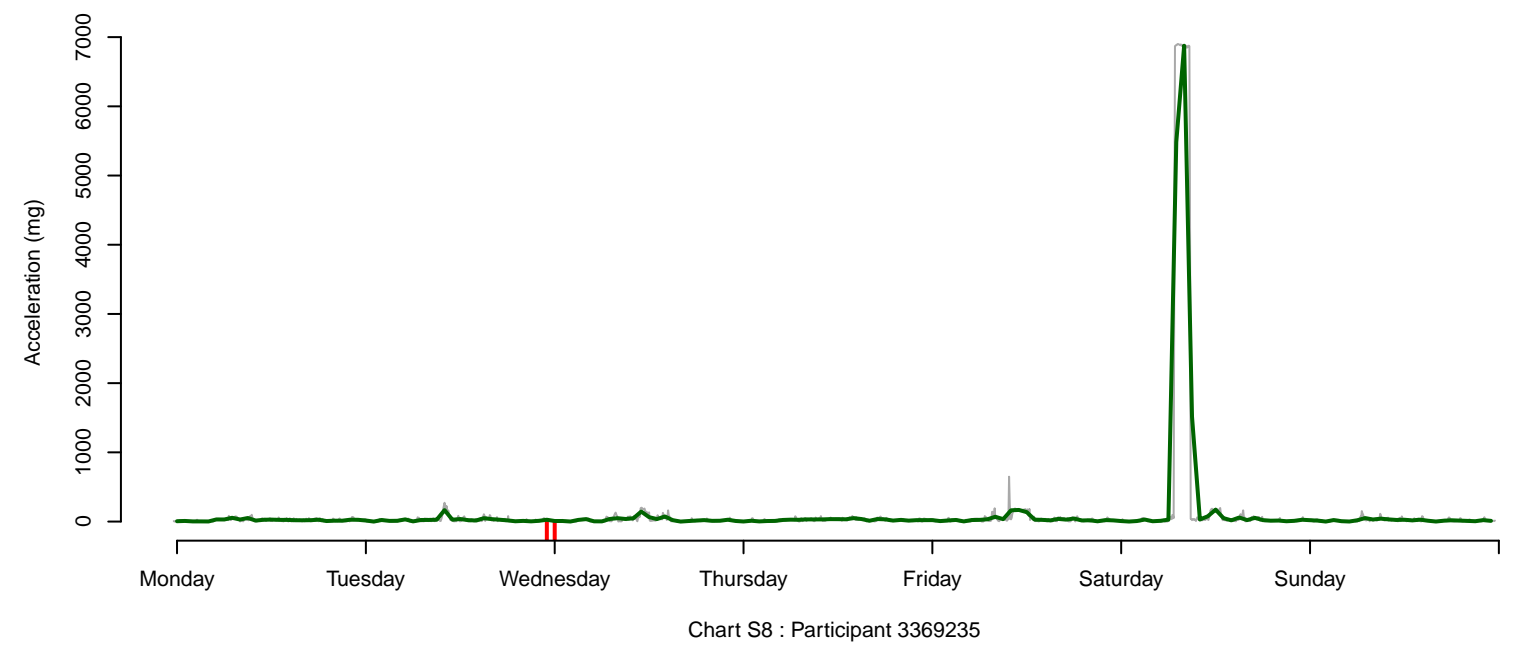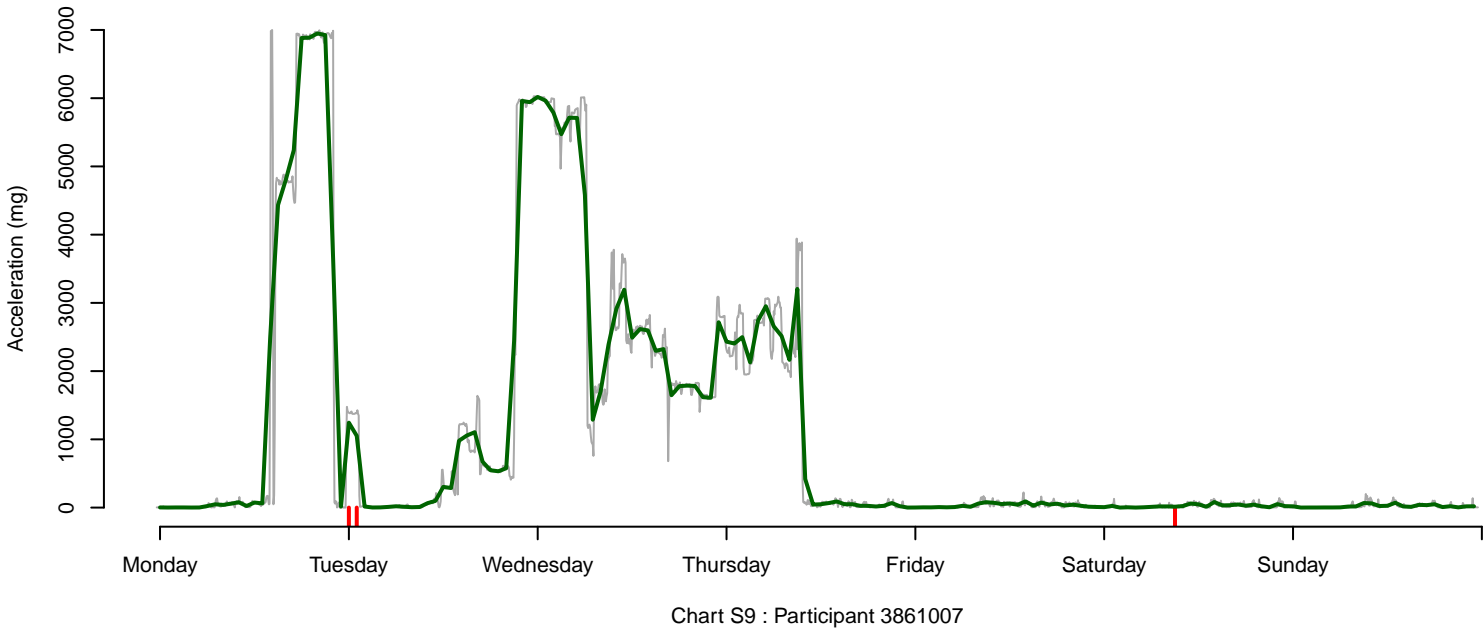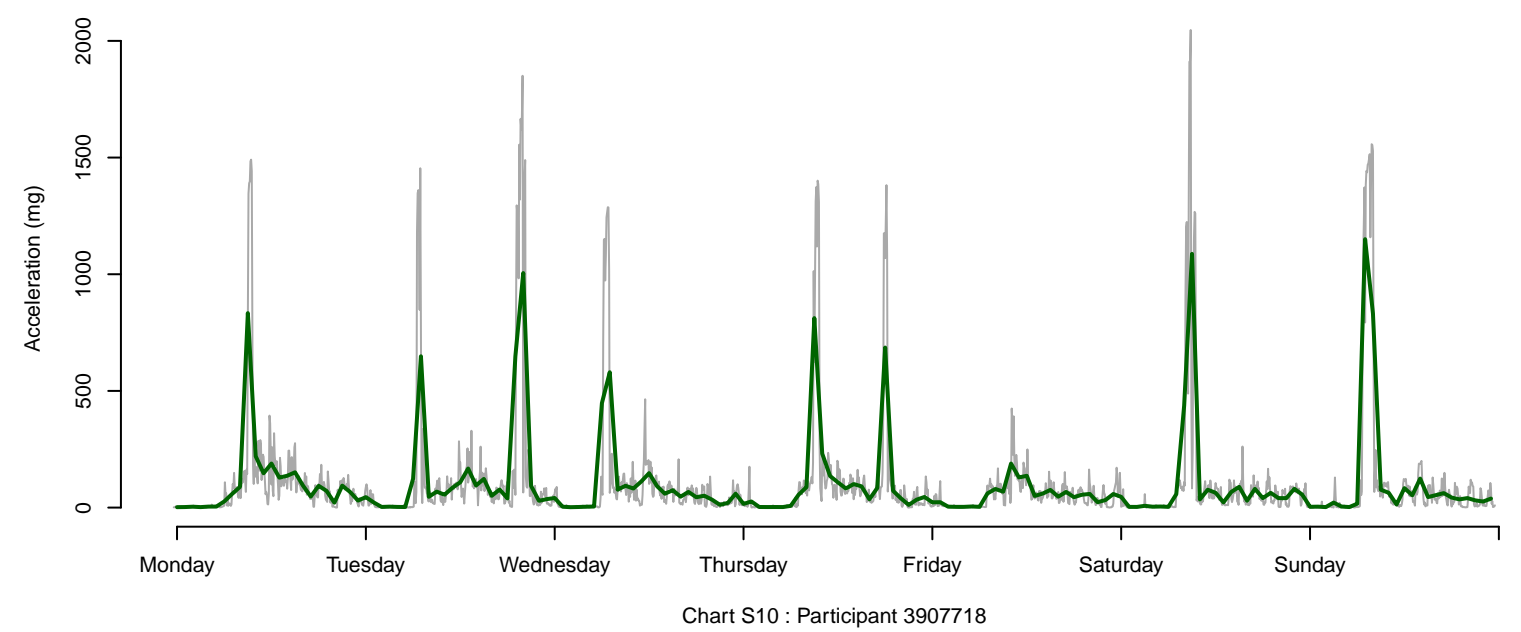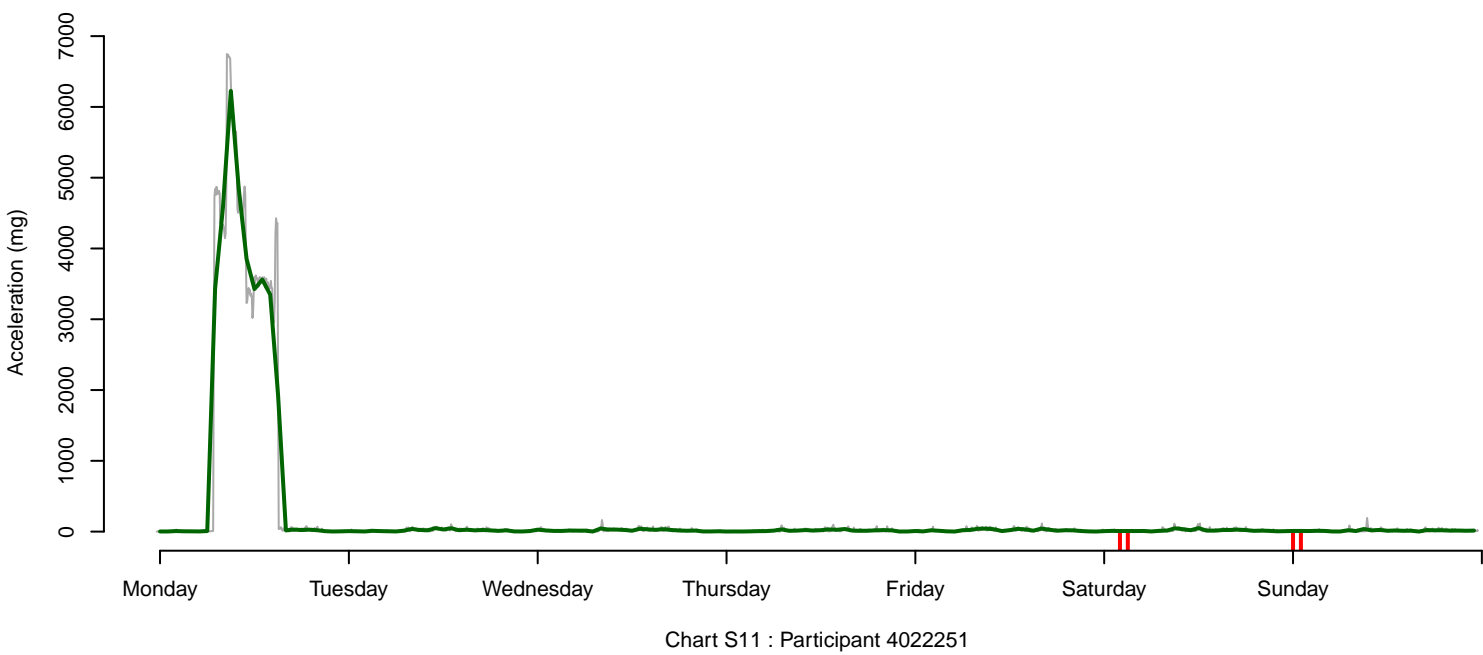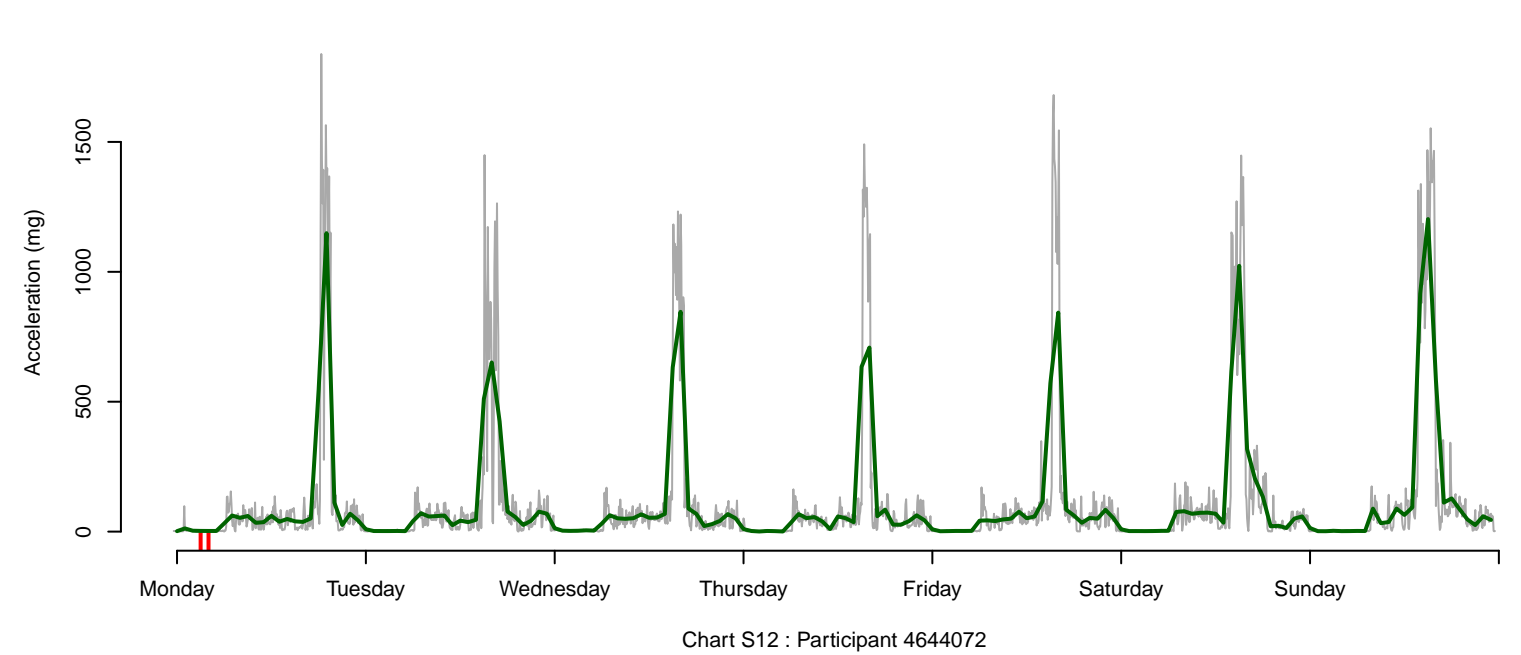

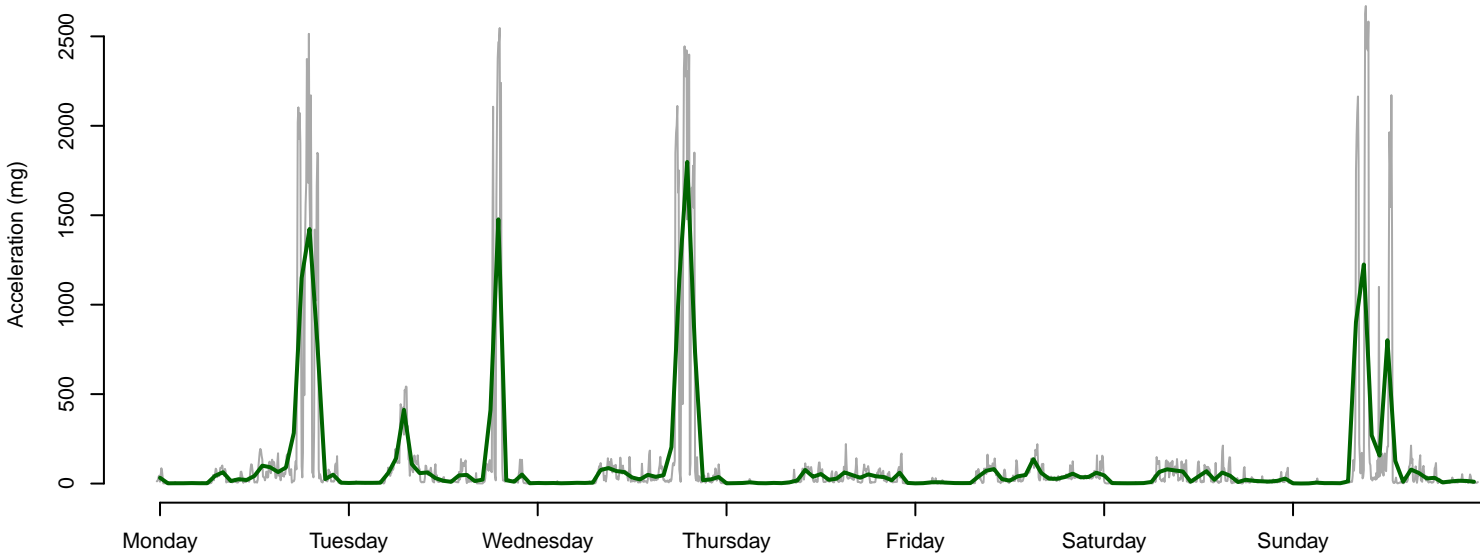

Chart S13 : Participant 4676741

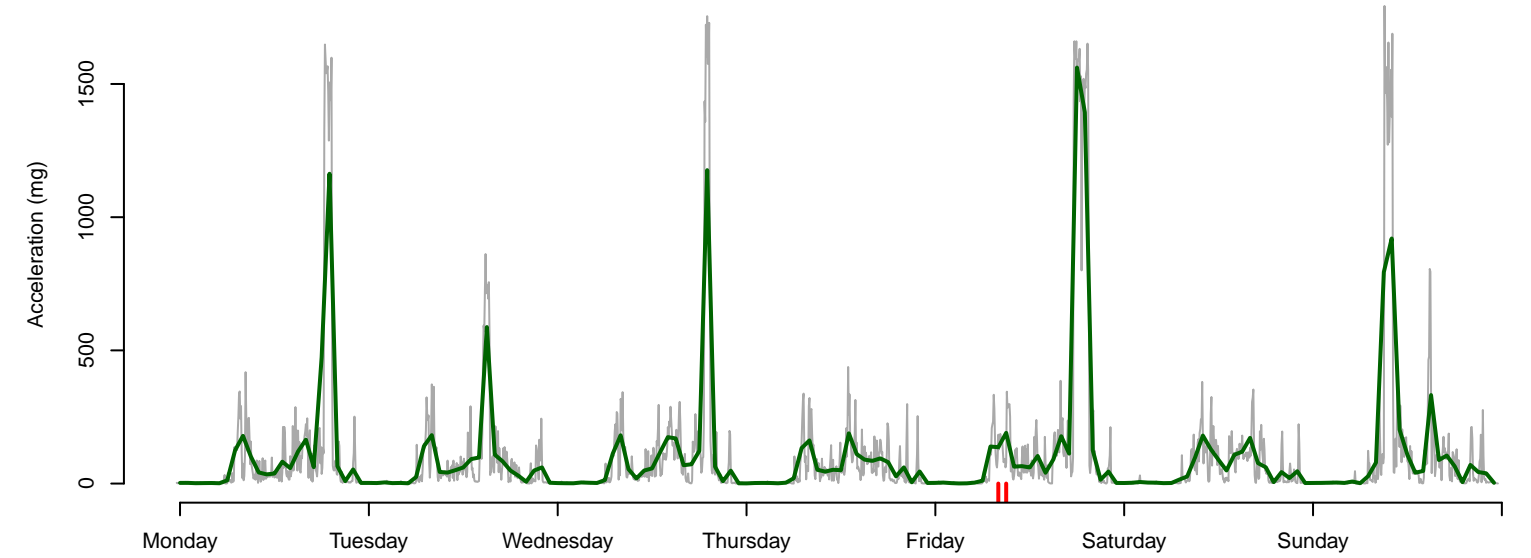

Chart S14 : Participant 5300206

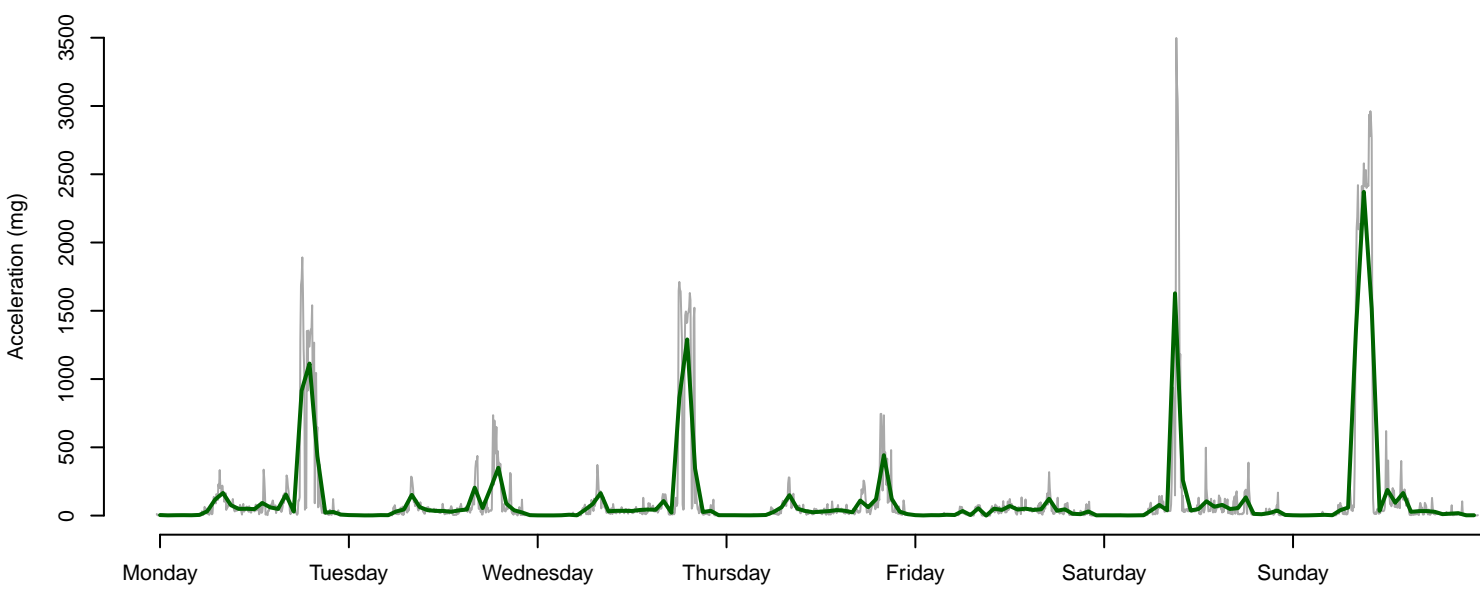

Chart S15 : Participant 5303014

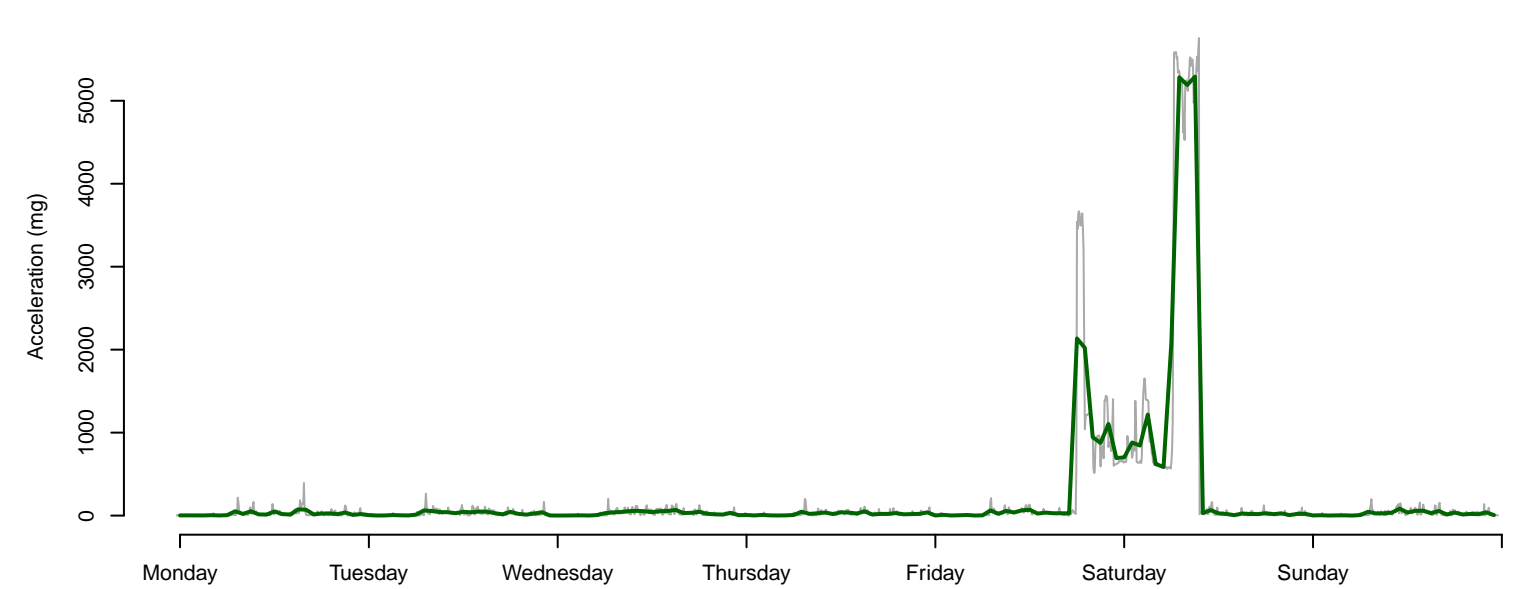

Chart S16 : Participant 5967168
