# Supplementary material for: Clustering Accelerometer Activity Patterns from the UK Biobank Cohort
Source: MDPI journal article supplement (doi:10.3390/s21248220), 2021-12-09
Supplement: s1 [file s1]

Table S1: Gender (n=91533)

|        | Active<br>9 to 5 | Active | Morning<br>Movers | Get up<br>and<br>Active | Live for<br>the<br>Weekend | Moderates | Leisurely<br>9 to 5 | Sedate | Inactive | Classification<br>sample | Wearable<br>sample | UK<br>Biobank |
|--------|------------------|--------|-------------------|-------------------------|----------------------------|-----------|---------------------|--------|----------|--------------------------|--------------------|---------------|
| Female | 61.1%            | 60.2%  | 59.5%             | 61.2%                   | 56.0%                      | 58.2%     | 49.5%               | 52.8%  | 45.3%    | 56.5%                    | 56.2%              | 54.4%         |
| Male   | 38.9%            | 39.8%  | 40.5%             | 38.8%                   | 44.0%                      | 41.8%     | 50.5%               | 47.2%  | 54.7%    | 43.5%                    | 43.8%              | 45.6%         |

Table S2: Age (n=91533)

|          | Active<br>9 to 5 | Active | Morning<br>Movers | Get up<br>and<br>Active | Live for<br>the<br>Weekend | Moderates | Leisurely<br>9 to 5 | Sedate | Inactive |       |       |       |
|----------|------------------|--------|-------------------|-------------------------|----------------------------|-----------|---------------------|--------|----------|-------|-------|-------|
| 40 to 44 | 22.4%            | 11.8%  | 6.9%              | 7.3%                    | 13.5%                      | 8.2%      | 18.6%               | 2.9%   | 5.4%     | 10.1% | 10.4% | 10.4% |
| 45 to 49 | 24.1%            | 15.9%  | 10.5%             | 10.0%                   | 17.6%                      | 11.8%     | 23.2%               | 5.2%   | 8.6%     | 13.3% | 13.3% | 13.2% |
| 50 to 54 | 21.3%            | 18.7%  | 15.2%             | 14.3%                   | 18.5%                      | 15.8%     | 24.3%               | 9.9%   | 12.2%    | 16.2% | 15.4% | 15.3% |
| 55 to 59 | 16.3%            | 23.6%  | 24.1%             | 21.1%                   | 18.9%                      | 21.8%     | 16.6%               | 19.6%  | 18.3%    | 20.1% | 18.5% | 18.2% |
| 60 to 64 | 11.5%            | 22.4%  | 29.2%             | 29.1%                   | 20.3%                      | 26.7%     | 10.8%               | 34.8%  | 28.7%    | 24.8% | 24.3% | 24.3% |
| 65 to 69 | 4.5%             | 7.6%   | 14.1%             | 18.2%                   | 11.2%                      | 15.7%     | 6.6%                | 27.6%  | 26.8%    | 15.5% | 18.1% | 18.7% |

Table S3: Ethnicity (n=91533)

|               | Active<br>9 to 5 | Active | Morning<br>Movers | Get up<br>and<br>Active | Live for<br>the<br>Weekend | Moderates | Leisurely<br>9 to 5 | Sedate | Inactive |       |       |       |
|---------------|------------------|--------|-------------------|-------------------------|----------------------------|-----------|---------------------|--------|----------|-------|-------|-------|
| White/British | 95.4%            | 97.2%  | 97.5%             | 97.2%                   | 96.3%                      | 95.9%     | 94.1%               | 98.0%  | 96.5%    | 96.6% | 96.4% | 94.1% |
| Mixed         | 0.8%             | 0.5%   | 0.5%              | 0.5%                    | 0.6%                       | 0.6%      | 0.8%                | 0.3%   | 0.5%     | 0.5%  | 0.6%  | 0.6%  |
| South Asian   | 0.9%             | 0.3%   | 0.6%              | 0.5%                    | 0.8%                       | 0.8%      | 1.7%                | 0.5%   | 1.0%     | 0.8%  | 0.8%  | 1.6%  |
| Black         | 1.2%             | 0.8%   | 0.4%              | 0.8%                    | 0.9%                       | 1.0%      | 1.8%                | 0.4%   | 0.7%     | 0.8%  | 0.9%  | 1.6%  |
| Other         | 1.4%             | 1.0%   | 0.7%              | 0.8%                    | 1.0%                       | 1.3%      | 1.2%                | 0.5%   | 0.8%     | 0.9%  | 1.0%  | 1.6%  |
| PNA/DK        | 0.3%             | 0.3%   | 0.3%              | 0.3%                    | 0.4%                       | 0.3%      | 0.3%                | 0.4%   | 0.5%     | 0.3%  | 0.4%  | 0.6%  |

Table S4: Employment (n=91533)

|                                                  | Active<br>9 to 5 | Active | Morning<br>Movers | Get up<br>and<br>Active | Live for<br>the<br>Weekend | Moderates | Leisurely<br>9 to 5 | Sedate | Inactive |       |       |       |
|--------------------------------------------------|------------------|--------|-------------------|-------------------------|----------------------------|-----------|---------------------|--------|----------|-------|-------|-------|
| None/PNA                                         | 0.5%             | 0.9%   | 0.8%              | 0.8%                    | 0.6%                       | 0.6%      | 0.5%                | 0.6%   | 0.8%     | 0.7%  | 0.7%  | 1.1%  |
| In paid employment or self-employed              | 81.6%            | 65.3%  | 55.8%             | 56.3%                   | 71.1%                      | 59.2%     | 85.8%               | 44.7%  | 47.8%    | 61.8% | 62.3% | 57.4% |
| Retired                                          | 11.6%            | 25.1%  | 36.4%             | 37.0%                   | 23.4%                      | 32.4%     | 10.0%               | 49.1%  | 40.9%    | 31.1% | 30.6% | 33.0% |
| Looking after home and/or family                 | 3.9%             | 5.2%   | 4.0%              | 3.1%                    | 2.4%                       | 3.0%      | 1.2%                | 1.9%   | 1.7%     | 2.8%  | 2.9%  | 2.8%  |
| Unable to work because of sickness or disability | 0.5%             | 1.1%   | 1.2%              | 1.0%                    | 0.8%                       | 2.4%      | 0.7%                | 2.0%   | 6.1%     | 1.6%  | 1.7%  | 3.4%  |
| Unemployed                                       | 1.1%             | 1.4%   | 1.0%              | 0.8%                    | 1.0%                       | 1.5%      | 1.3%                | 0.9%   | 1.9%     | 1.2%  | 1.2%  | 1.7%  |
| Doing unpaid or voluntary work                   | 0.3%             | 0.8%   | 0.5%              | 0.7%                    | 0.4%                       | 0.6%      | 0.3%                | 0.6%   | 0.5%     | 0.5%  | 0.5%  | 0.5%  |
| Full or part-time student                        | 0.5%             | 0.3%   | 0.2%              | 0.3%                    | 0.3%                       | 0.2%      | 0.3%                | 0.2%   | 0.3%     | 0.3%  | 0.3%  | 0.3%  |

**Table S5: Mode (Excl None) (n=51667)**

|                   | Active<br>9 to 5 | Active | Morning<br>Movers | Get up<br>and<br>Active | Live for<br>the<br>Weekend | Moderates | Leisurely<br>9 to 5 | Sedate | Inactive |       |       |       |
|-------------------|------------------|--------|-------------------|-------------------------|----------------------------|-----------|---------------------|--------|----------|-------|-------|-------|
| Car/motor vehicle | 53.4%            | 59.4%  | 63.5%             | 58.7%                   | 60.8%                      | 60.7%     | 58.1%               | 65.6%  | 63.7%    | 60.1% | 60.0% | 63.0% |
| Walk/cycle        | 11.8%            | 11.0%  | 8.0%              | 8.7%                    | 7.2%                       | 6.6%      | 6.4%                | 6.3%   | 5.3%     | 8.0%  | 7.9%  | 7.6%  |
| Public transport  | 7.4%             | 6.1%   | 6.3%              | 8.1%                    | 7.6%                       | 9.0%      | 10.5%               | 8.3%   | 10.0%    | 8.2%  | 8.3%  | 9.0%  |
| Mixed             | 27.4%            | 23.5%  | 22.1%             | 24.5%                   | 24.3%                      | 23.7%     | 24.9%               | 19.8%  | 21.0%    | 23.8% | 23.8% | 20.4% |
| PNA/DK            | 23.8%            | 40.9%  | 49.4%             | 49.1%                   | 33.9%                      | 47.1%     | 18.2%               | 60.3%  | 58.2%    | 43.6% | 43.1% | 47.2% |

**Table S6: Education (n=91533)**

|                    | Active<br>9 to 5 | Active | Morning<br>Movers | Get up<br>and<br>Active | Live for<br>the<br>Weekend | Moderates | Leisurely<br>9 to 5 | Sedate | Inactive |       |       |       |
|--------------------|------------------|--------|-------------------|-------------------------|----------------------------|-----------|---------------------|--------|----------|-------|-------|-------|
| College/University | 46.9%            | 41.9%  | 39.2%             | 44.3%                   | 46.1%                      | 44.8%     | 46.5%               | 37.4%  | 39.6%    | 42.9% | 43.1% | 32.1% |
| A levels           | 13.6%            | 13.8%  | 12.4%             | 13.3%                   | 13.4%                      | 13.5%     | 13.7%               | 12.3%  | 12.7%    | 13.1% | 13.1% | 11.0% |
| GCSE               | 19.8%            | 21.9%  | 21.6%             | 19.9%                   | 20.2%                      | 19.5%     | 19.4%               | 21.4%  | 19.5%    | 20.4% | 20.3% | 20.9% |
| CSE                | 5.9%             | 4.9%   | 4.7%              | 3.0%                    | 3.9%                       | 3.8%      | 5.0%                | 3.1%   | 3.0%     | 4.0%  | 4.0%  | 5.4%  |
| NVQ                | 4.6%             | 4.8%   | 5.3%              | 4.7%                    | 5.0%                       | 5.1%      | 5.5%                | 6.6%   | 6.4%     | 5.3%  | 5.3%  | 6.5%  |
| Other              | 3.6%             | 4.7%   | 5.3%              | 5.6%                    | 4.5%                       | 4.6%      | 4.1%                | 6.3%   | 5.3%     | 5.0%  | 5.0%  | 5.1%  |
| None               | 4.9%             | 7.2%   | 10.4%             | 8.2%                    | 6.0%                       | 7.7%      | 4.8%                | 11.8%  | 12.1%    | 8.2%  | 8.1%  | 16.9% |
| PNA                | 0.7%             | 0.7%   | 1.0%              | 1.0%                    | 0.9%                       | 1.0%      | 1.1%                | 1.2%   | 1.3%     | 1.0%  | 1.0%  | 2.0%  |

**Table S7: Income (n=91533)**

|                      | Active<br>9 to 5 | Active | Morning<br>Movers | Get up<br>and<br>Active | Live for<br>the<br>Weekend | Moderates | Leisurely<br>9 to 5 | Sedate | Inactive |       |       |       |
|----------------------|------------------|--------|-------------------|-------------------------|----------------------------|-----------|---------------------|--------|----------|-------|-------|-------|
| PNA/DK               | 8.2%             | 10.9%  | 11.6%             | 11.3%                   | 8.7%                       | 10.4%     | 7.5%                | 11.9%  | 10.8%    | 10.3% | 10.3% | 15.3% |
| Less than 18,000     | 8.5%             | 12.2%  | 13.5%             | 13.0%                   | 9.8%                       | 15.2%     | 7.7%                | 17.3%  | 21.6%    | 13.2% | 13.1% | 19.3% |
| 18,000 to 30,999     | 17.3%            | 20.6%  | 22.6%             | 22.8%                   | 19.1%                      | 22.7%     | 17.5%               | 26.1%  | 24.0%    | 21.7% | 21.5% | 21.5% |
| 31,000 to 51,999     | 27.5%            | 26.2%  | 26.4%             | 25.6%                   | 26.3%                      | 25.3%     | 27.9%               | 24.1%  | 22.9%    | 25.8% | 25.7% | 22.1% |
| 52,000 to 100,000    | 29.5%            | 23.3%  | 20.4%             | 21.0%                   | 27.3%                      | 20.8%     | 29.6%               | 16.9%  | 16.2%    | 22.5% | 22.7% | 17.2% |
| Greater than 100,000 | 9.1%             | 6.8%   | 5.5%              | 6.3%                    | 8.8%                       | 5.6%      | 9.8%                | 3.7%   | 4.4%     | 6.5%  | 6.7%  | 4.6%  |

**Table S8: Obesity (n=91533)**

|             | Active<br>9 to 5 | Active | Morning<br>Movers | Get up<br>and<br>Active | Live for<br>the<br>Weekend | Moderates | Leisurely<br>9 to 5 | Sedate | Inactive |       |       |       |
|-------------|------------------|--------|-------------------|-------------------------|----------------------------|-----------|---------------------|--------|----------|-------|-------|-------|
| Underweight | 1.2%             | 1.0%   | 0.6%              | 0.6%                    | 0.6%                       | 0.4%      | 0.4%                | 0.3%   | 0.4%     | 0.6%  | 0.6%  | 0.5%  |
| Healthy     | 55.8%            | 54.1%  | 43.5%             | 42.5%                   | 41.1%                      | 33.6%     | 33.7%               | 27.2%  | 20.1%    | 38.7% | 38.6% | 32.3% |
| Overweight  | 34.2%            | 36.4%  | 42.0%             | 41.7%                   | 41.8%                      | 43.0%     | 41.2%               | 45.0%  | 38.7%    | 41.1% | 41.0% | 42.2% |
| Obese       | 8.6%             | 8.4%   | 13.9%             | 15.1%                   | 16.4%                      | 22.8%     | 24.6%               | 27.2%  | 40.2%    | 19.4% | 19.6% | 24.3% |
| NA          | 0.2%             | 0.1%   | 0.1%              | 0.1%                    | 0.2%                       | 0.3%      | 0.2%                | 0.3%   | 0.7%     | 0.2%  | 0.2%  | 0.6%  |

**Table S9: Overall health (n=91533)**

|           | Active<br>9 to 5 | Active | Morning<br>Movers | Get up<br>and<br>Active | Live for<br>the<br>Weekend | Moderates | Leisurely<br>9 to 5 | Sedate | Inactive |       |       |       |
|-----------|------------------|--------|-------------------|-------------------------|----------------------------|-----------|---------------------|--------|----------|-------|-------|-------|
| PNA/DNK   | 0.2%             | 0.2%   | 0.2%              | 0.2%                    | 0.2%                       | 0.2%      | 0.3%                | 0.3%   | 0.5%     | 0.2%  | 0.2%  | 0.7%  |
| Excellent | 31.3%            | 28.9%  | 24.9%             | 22.9%                   | 24.2%                      | 18.1%     | 20.1%               | 15.4%  | 11.1%    | 21.7% | 21.7% | 16.3% |
| Good      | 58.5%            | 59.7%  | 61.6%             | 62.0%                   | 60.8%                      | 59.3%     | 60.3%               | 61.1%  | 49.8%    | 59.8% | 59.7% | 57.5% |
| Fair      | 9.2%             | 10.2%  | 11.8%             | 13.4%                   | 13.4%                      | 18.8%     | 17.0%               | 19.6%  | 29.4%    | 15.7% | 15.8% | 21.0% |
| Poor      | 0.7%             | 0.9%   | 1.6%              | 1.5%                    | 1.4%                       | 3.6%      | 2.3%                | 3.5%   | 9.3%     | 2.6%  | 2.6%  | 4.5%  |

**Table S10: Long standing illness (n=91533)**

|         | Active<br>9 to 5 | Active | Morning<br>Movers | Get up<br>and<br>Active | Live for<br>the<br>Weekend | Moderates | Leisurely<br>9 to 5 | Sedate | Inactive |       |       |       |
|---------|------------------|--------|-------------------|-------------------------|----------------------------|-----------|---------------------|--------|----------|-------|-------|-------|
| PNA/DNK | 1.5%             | 1.7%   | 1.9%              | 1.7%                    | 1.9%                       | 2.1%      | 1.9%                | 2.4%   | 2.1%     | 1.9%  | 1.9%  | 2.7%  |
| No      | 81.5%            | 77.7%  | 74.6%             | 71.4%                   | 74.9%                      | 66.3%     | 72.7%               | 62.5%  | 48.1%    | 70.1% | 70.1% | 65.6% |
| Yes     | 17.1%            | 20.6%  | 23.4%             | 26.9%                   | 23.1%                      | 31.6%     | 25.4%               | 35.1%  | 49.8%    | 28.0% | 28.0% | 31.8% |

**Table S11: Getting up (n=91533)**

|                 | Active<br>9 to 5 | Active | Morning<br>Movers | Get up<br>and<br>Active | Live for<br>the<br>Weekend | Moderates | Leisurely<br>9 to 5 | Sedate | Inactive |       |       |       |
|-----------------|------------------|--------|-------------------|-------------------------|----------------------------|-----------|---------------------|--------|----------|-------|-------|-------|
| Not at all easy | 2.2%             | 3.3%   | 2.5%              | 2.3%                    | 2.4%                       | 6.5%      | 2.8%                | 2.8%   | 6.3%     | 3.3%  | 3.4%  | 3.9%  |
| Not very easy   | 12.4%            | 15.1%  | 11.5%             | 12.0%                   | 12.4%                      | 20.4%     | 13.8%               | 12.1%  | 17.8%    | 13.8% | 13.9% | 13.9% |
| Fairly easy     | 52.8%            | 52.8%  | 51.9%             | 49.9%                   | 51.8%                      | 50.3%     | 50.1%               | 50.0%  | 46.0%    | 50.6% | 50.7% | 49.1% |
| Very easy       | 32.2%            | 28.4%  | 33.5%             | 35.2%                   | 32.8%                      | 22.1%     | 32.6%               | 34.4%  | 29.1%    | 31.6% | 31.4% | 31.9% |
| PNA/DK          | 0.5%             | 0.5%   | 0.6%              | 0.6%                    | 0.6%                       | 0.7%      | 0.7%                | 0.7%   | 0.8%     | 0.6%  | 0.6%  | 1.1%  |

**Table S12: Chronotype (n=91533)**

|                                           | Active<br>9 to 5 | Active | Morning<br>Movers | Get up<br>and<br>Active | Live for<br>the<br>Weekend | Moderates | Leisurely<br>9 to 5 | Sedate | Inactive |       |       |       |
|-------------------------------------------|------------------|--------|-------------------|-------------------------|----------------------------|-----------|---------------------|--------|----------|-------|-------|-------|
| Definitely a 'morning' person             | 30.7%            | 19.0%  | 24.4%             | 25.0%                   | 26.4%                      | 12.1%     | 28.7%               | 21.6%  | 17.0%    | 22.9% | 22.9% | 23.9% |
| More a 'morning' than 'evening' person    | 35.1%            | 33.5%  | 35.7%             | 35.5%                   | 35.3%                      | 26.7%     | 34.4%               | 35.0%  | 27.6%    | 33.5% | 33.4% | 31.3% |
| More an 'evening' than a 'morning' person | 20.3%            | 26.5%  | 23.8%             | 22.3%                   | 22.1%                      | 33.5%     | 20.5%               | 24.7%  | 29.0%    | 24.6% | 24.7% | 25.1% |
| Definitely an 'evening' person            | 4.5%             | 9.1%   | 5.5%              | 6.1%                    | 5.6%                       | 16.7%     | 6.5%                | 7.4%   | 15.7%    | 8.2%  | 8.3%  | 8.0%  |
| PNA/DK                                    | 9.5%             | 11.8%  | 10.6%             | 11.1%                   | 10.6%                      | 11.0%     | 9.8%                | 11.3%  | 10.8%    | 10.8% | 10.8% | 11.6% |

**Table S13: Deprivation (n=91427)**

|                       | Active<br>9 to 5 | Active | Morning<br>Movers | Get up<br>and<br>Active | Live for<br>the<br>Weekend | Moderates | Leisurely<br>9 to 5 | Sedate | Inactive |       |       |       |
|-----------------------|------------------|--------|-------------------|-------------------------|----------------------------|-----------|---------------------|--------|----------|-------|-------|-------|
| Least deprived        | 21.7%            | 24.5%  | 24.5%             | 24.3%                   | 23.5%                      | 20.9%     | 19.7%               | 24.1%  | 19.2%    | 22.8% | 22.6% | 20.0% |
| Second least deprived | 21.7%            | 22.0%  | 23.2%             | 23.0%                   | 21.7%                      | 20.7%     | 19.4%               | 22.8%  | 18.9%    | 21.7% | 21.6% | 20.0% |
| Middle deprived       | 20.0%            | 21.6%  | 21.2%             | 20.7%                   | 21.0%                      | 20.0%     | 20.4%               | 21.0%  | 18.6%    | 20.6% | 20.6% | 20.0% |
| Second most deprived  | 20.5%            | 18.4%  | 18.6%             | 18.6%                   | 19.7%                      | 20.3%     | 21.9%               | 18.0%  | 21.8%    | 19.5% | 19.6% | 20.0% |
| Most deprived         | 16.0%            | 13.4%  | 12.4%             | 13.3%                   | 14.0%                      | 18.0%     | 18.4%               | 14.0%  | 21.3%    | 15.2% | 15.4% | 20.0% |
| NA                    | 0.1%             | 0.1%   | 0.1%              | 0.1%                    | 0.1%                       | 0.1%      | 0.2%                | 0.2%   | 0.2%     | 0.1%  | 0.1%  | 0.1%  |

**Table S14: Season (n=91533)**

|        | Active<br>9 to 5 | Active | Morning<br>Movers | Get up<br>and<br>Active | Live for<br>the<br>Weekend | Moderates | Leisurely<br>9 to 5 | Sedate | Inactive |       |       |  |
|--------|------------------|--------|-------------------|-------------------------|----------------------------|-----------|---------------------|--------|----------|-------|-------|--|
| Spring | 25.1%            | 24.7%  | 21.6%             | 23.3%                   | 23.5%                      | 21.0%     | 23.1%               | 20.3%  | 20.5%    | 22.5% | 22.8% |  |
| Summer | 29.3%            | 27.7%  | 27.9%             | 25.1%                   | 27.5%                      | 26.0%     | 26.6%               | 24.1%  | 24.4%    | 26.4% | 26.5% |  |
| Autumn | 27.8%            | 30.1%  | 29.9%             | 30.1%                   | 28.6%                      | 29.7%     | 29.1%               | 30.4%  | 30.1%    | 29.6% | 29.7% |  |
| Winter | 17.8%            | 17.5%  | 20.6%             | 21.5%                   | 20.4%                      | 23.3%     | 21.2%               | 25.2%  | 24.9%    | 21.6% | 21.1% |  |

**Table S15: Assessment centre (n=91533)**

|                  | Active<br>9 to 5 | Active | Morning<br>Movers | Get up<br>and<br>Active | Live for<br>the<br>Weekend | Moderates | Leisurely<br>9 to 5 | Sedate | Inactive |       |       |       |
|------------------|------------------|--------|-------------------|-------------------------|----------------------------|-----------|---------------------|--------|----------|-------|-------|-------|
| North            | 34.7%            | 41.5%  | 40.4%             | 37.1%                   | 35.8%                      | 39.1%     | 35.9%               | 41.3%  | 38.9%    | 38.2% | 38.2% | 42.1% |
| Midlands         | 15.0%            | 14.9%  | 16.2%             | 14.9%                   | 15.4%                      | 13.8%     | 14.6%               | 15.1%  | 14.4%    | 15.0% | 14.9% | 15.7% |
| Southern England | 22.3%            | 18.7%  | 19.3%             | 21.5%                   | 21.9%                      | 17.8%     | 21.8%               | 19.9%  | 19.1%    | 20.4% | 20.3% | 17.2% |
| London           | 17.8%            | 13.2%  | 13.8%             | 16.4%                   | 16.8%                      | 18.4%     | 18.9%               | 13.9%  | 16.8%    | 16.2% | 16.4% | 13.7% |
| Wales            | 3.4%             | 3.9%   | 3.9%              | 3.4%                    | 3.9%                       | 3.9%      | 3.2%                | 3.9%   | 4.2%     | 3.7%  | 3.7%  | 4.2%  |
| Scotland         | 6.9%             | 7.6%   | 6.4%              | 6.7%                    | 6.1%                       | 7.1%      | 5.6%                | 6.0%   | 6.6%     | 6.5%  | 6.5%  | 7.1%  |
