# Supplementary figures and images for: Clustering Accelerometer Activity Patterns from the UK Biobank Cohort
Source: MDPI journal article supplement (doi:10.3390/s21248220), 2021-12-09

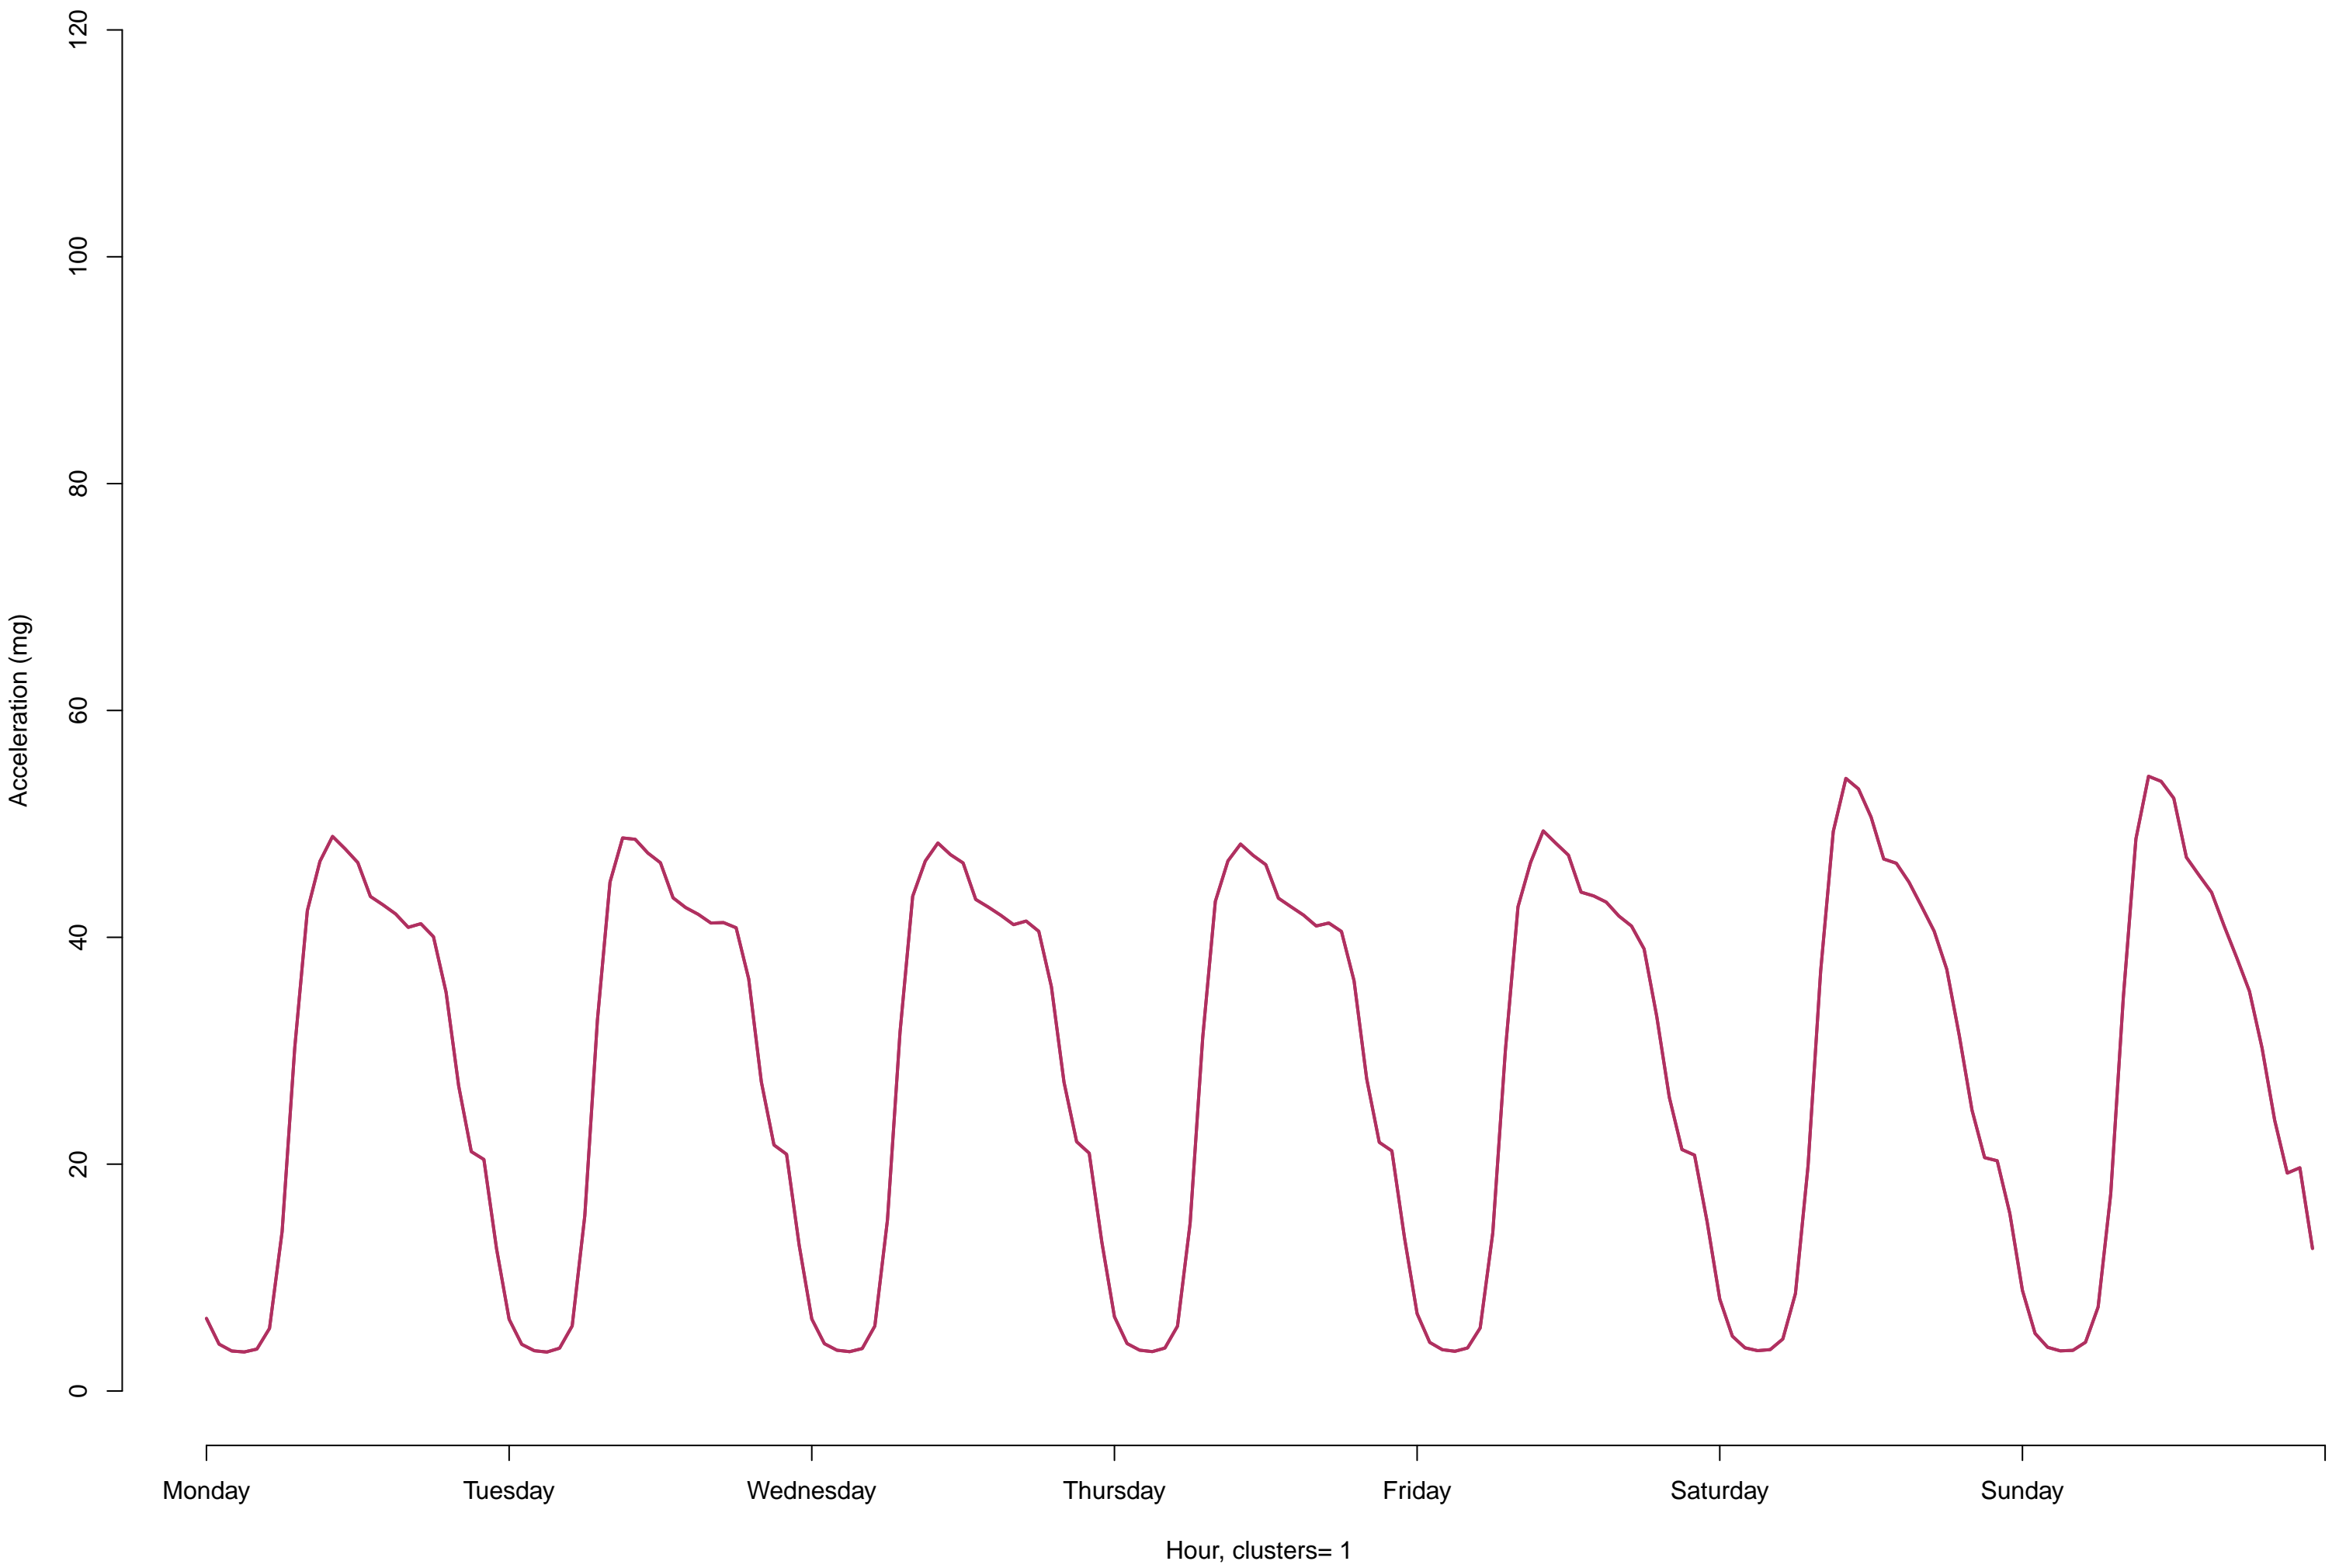

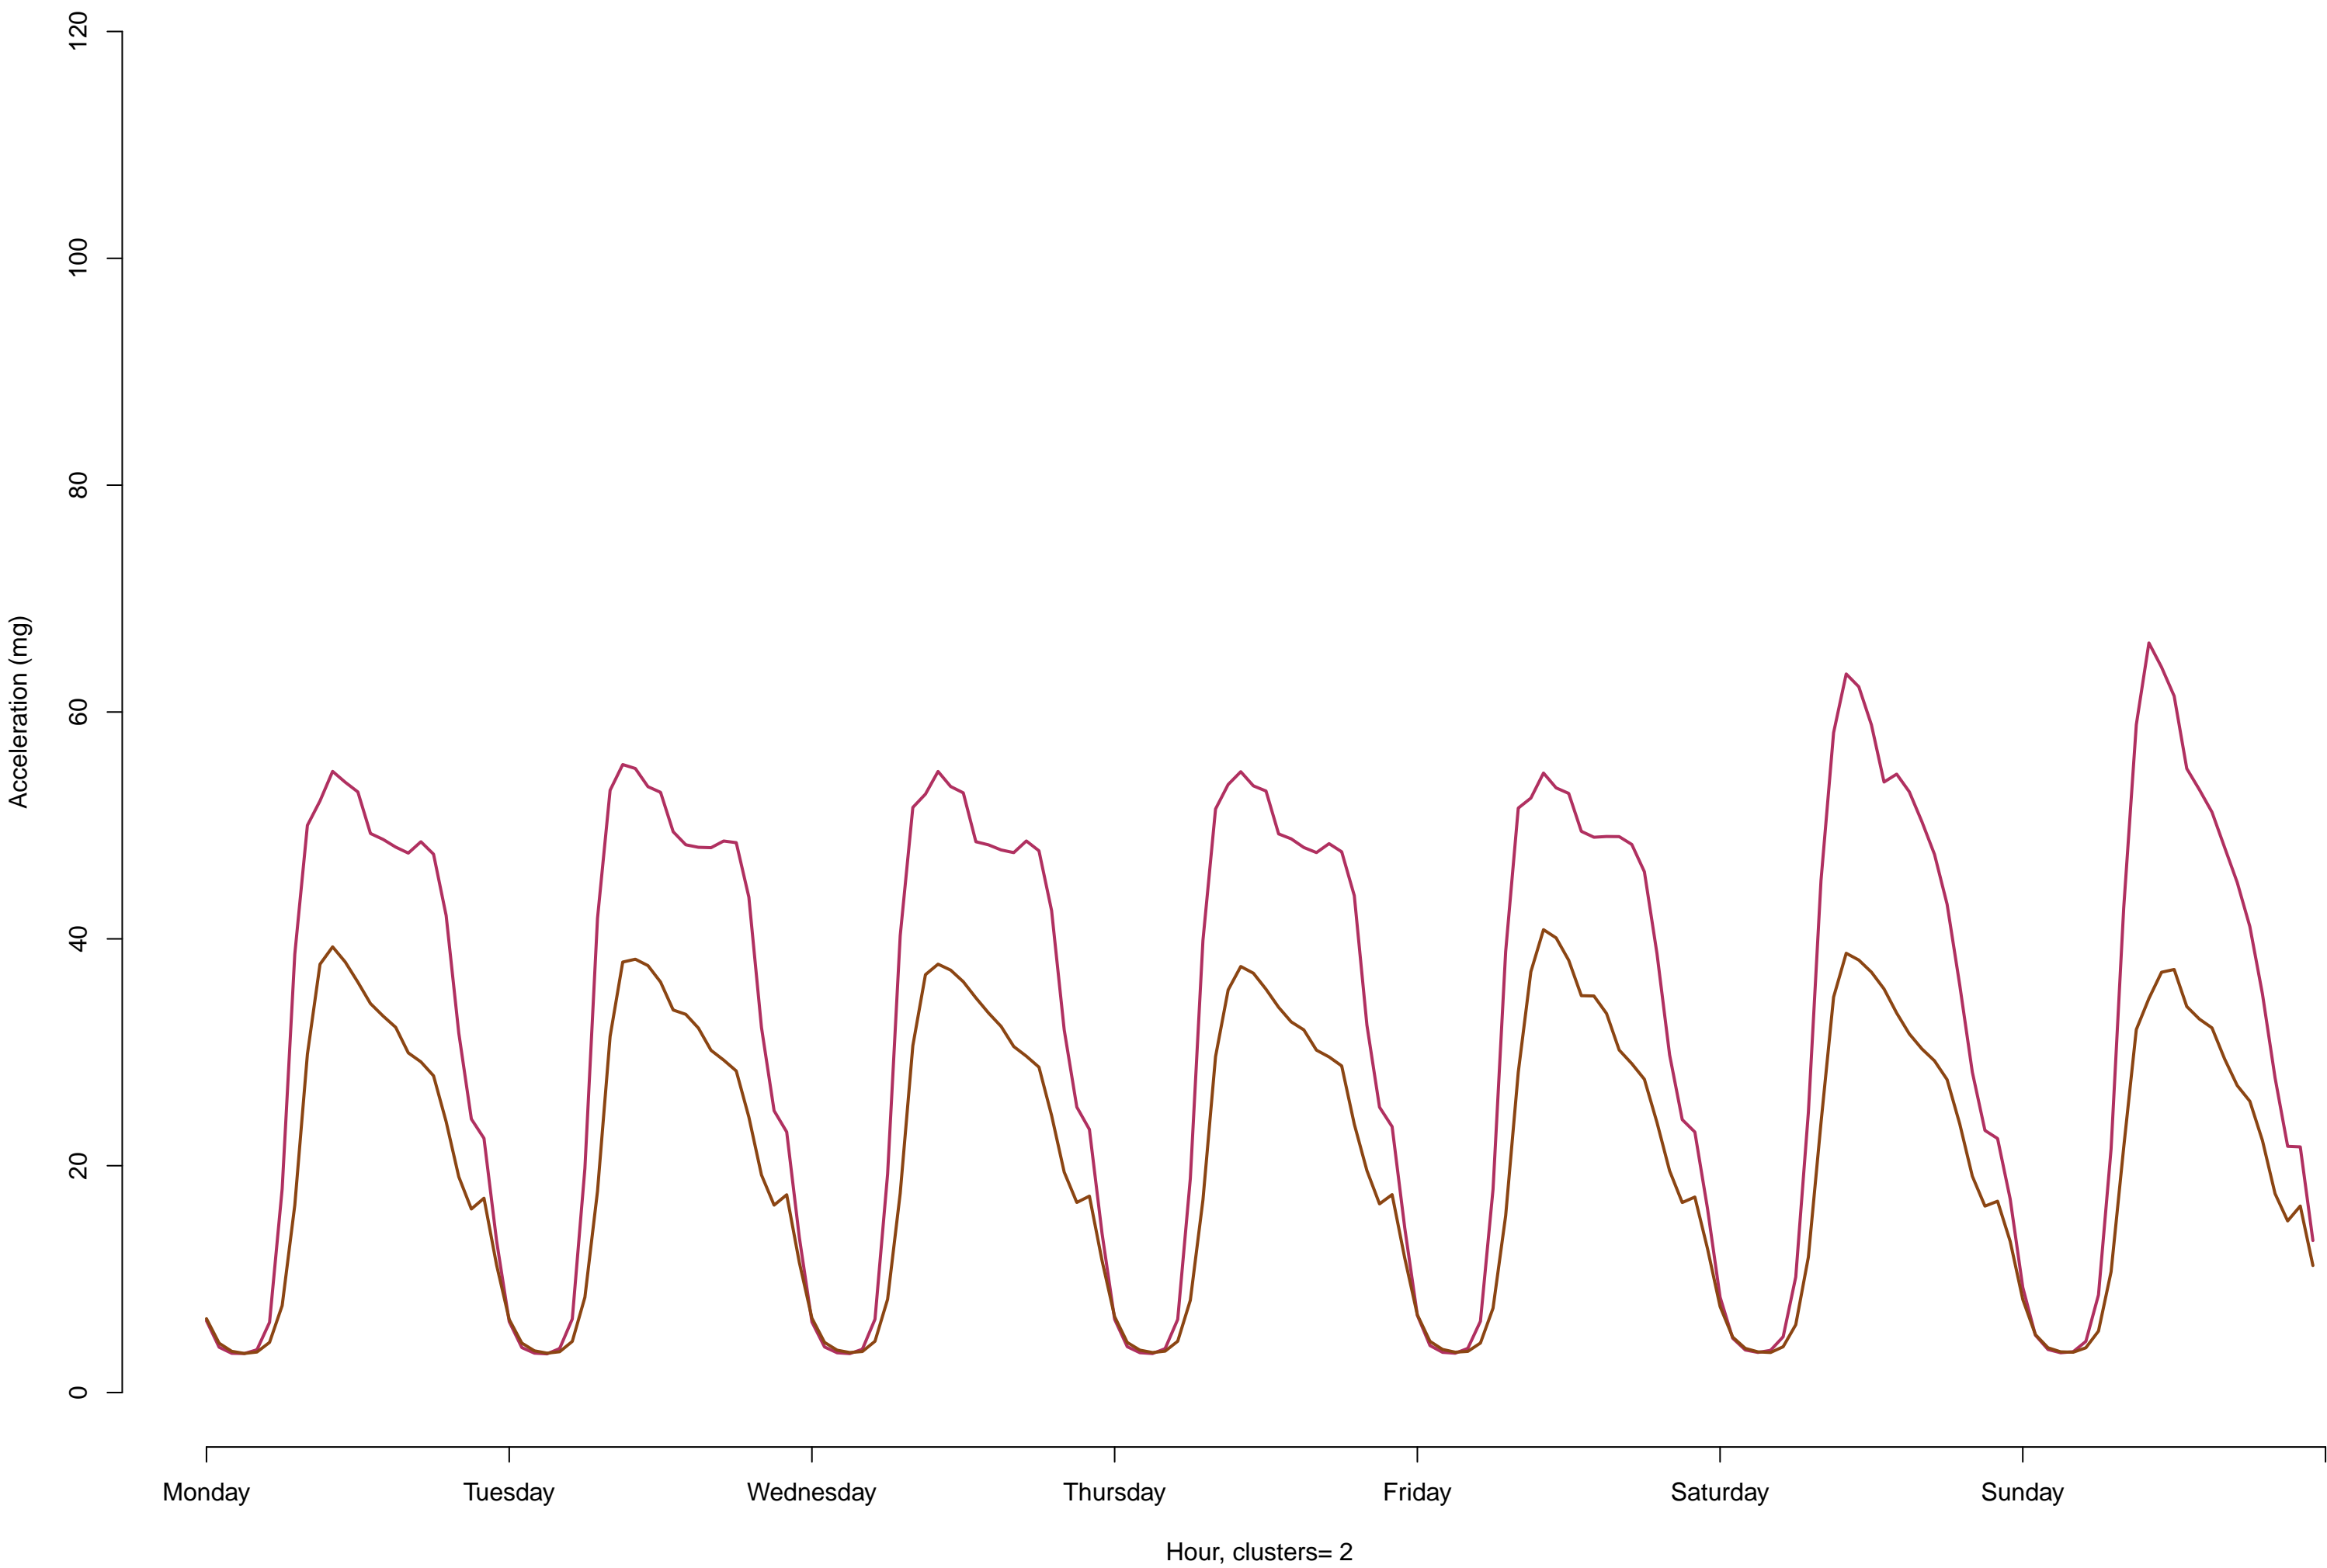

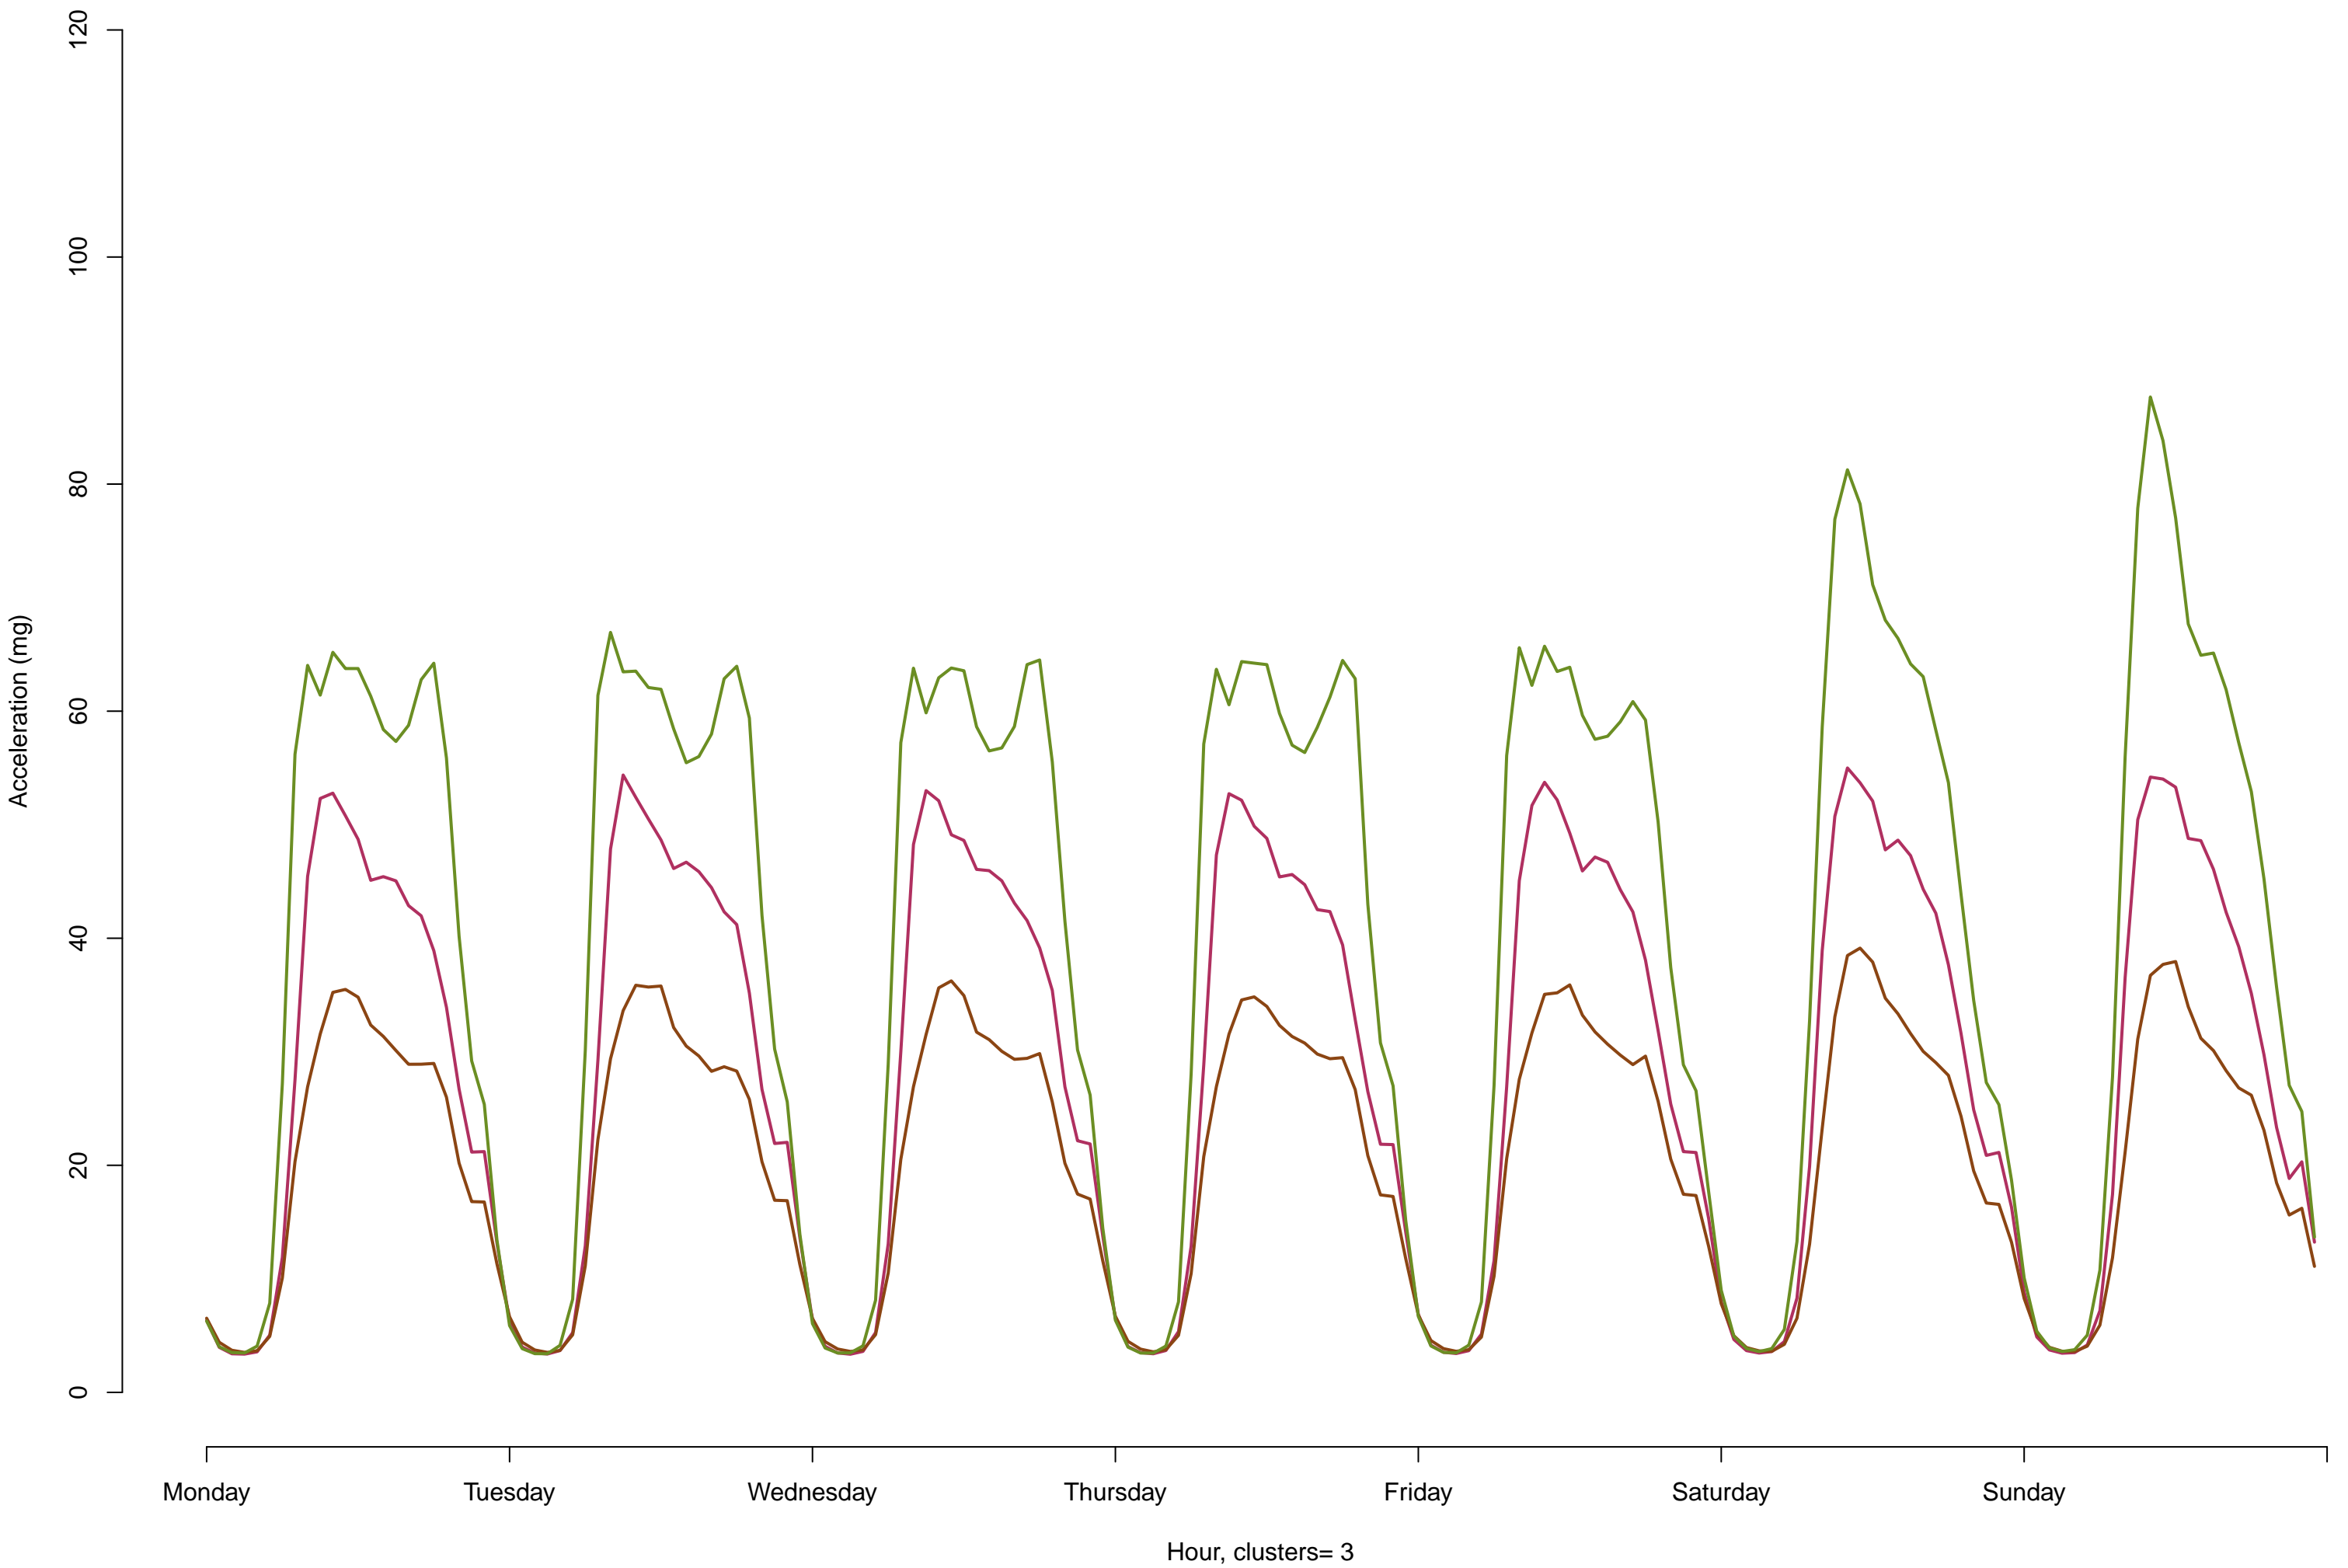

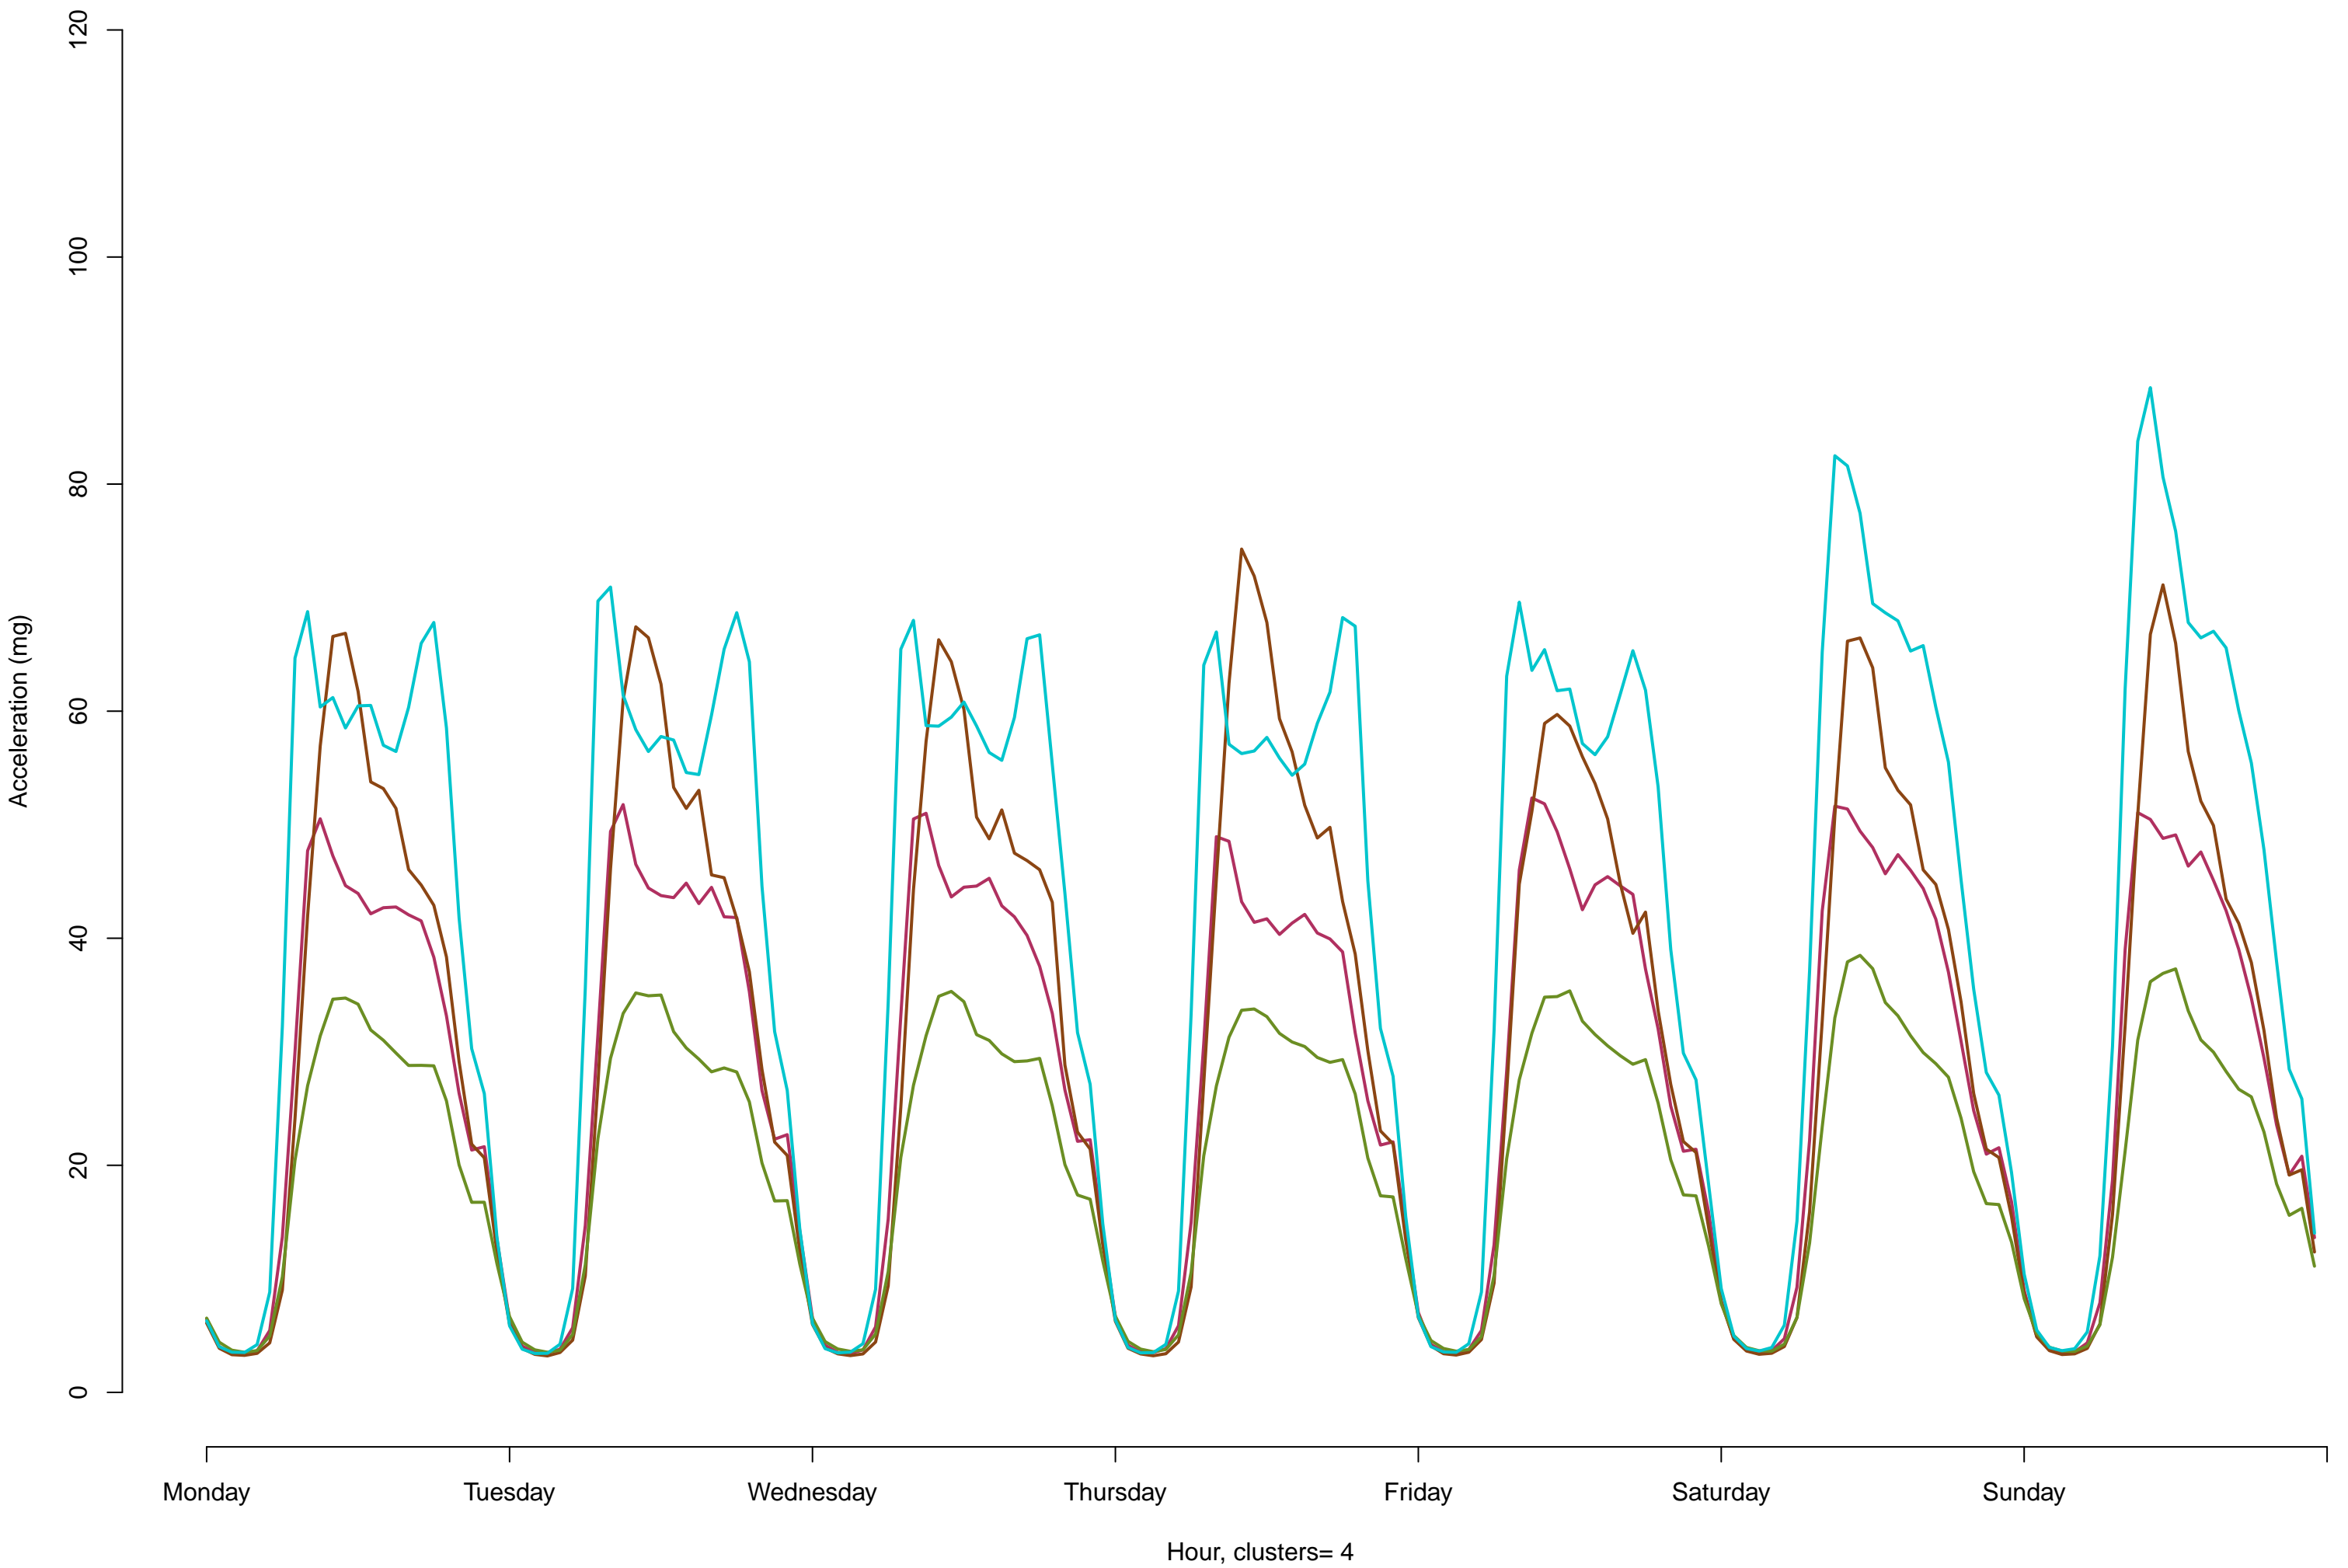

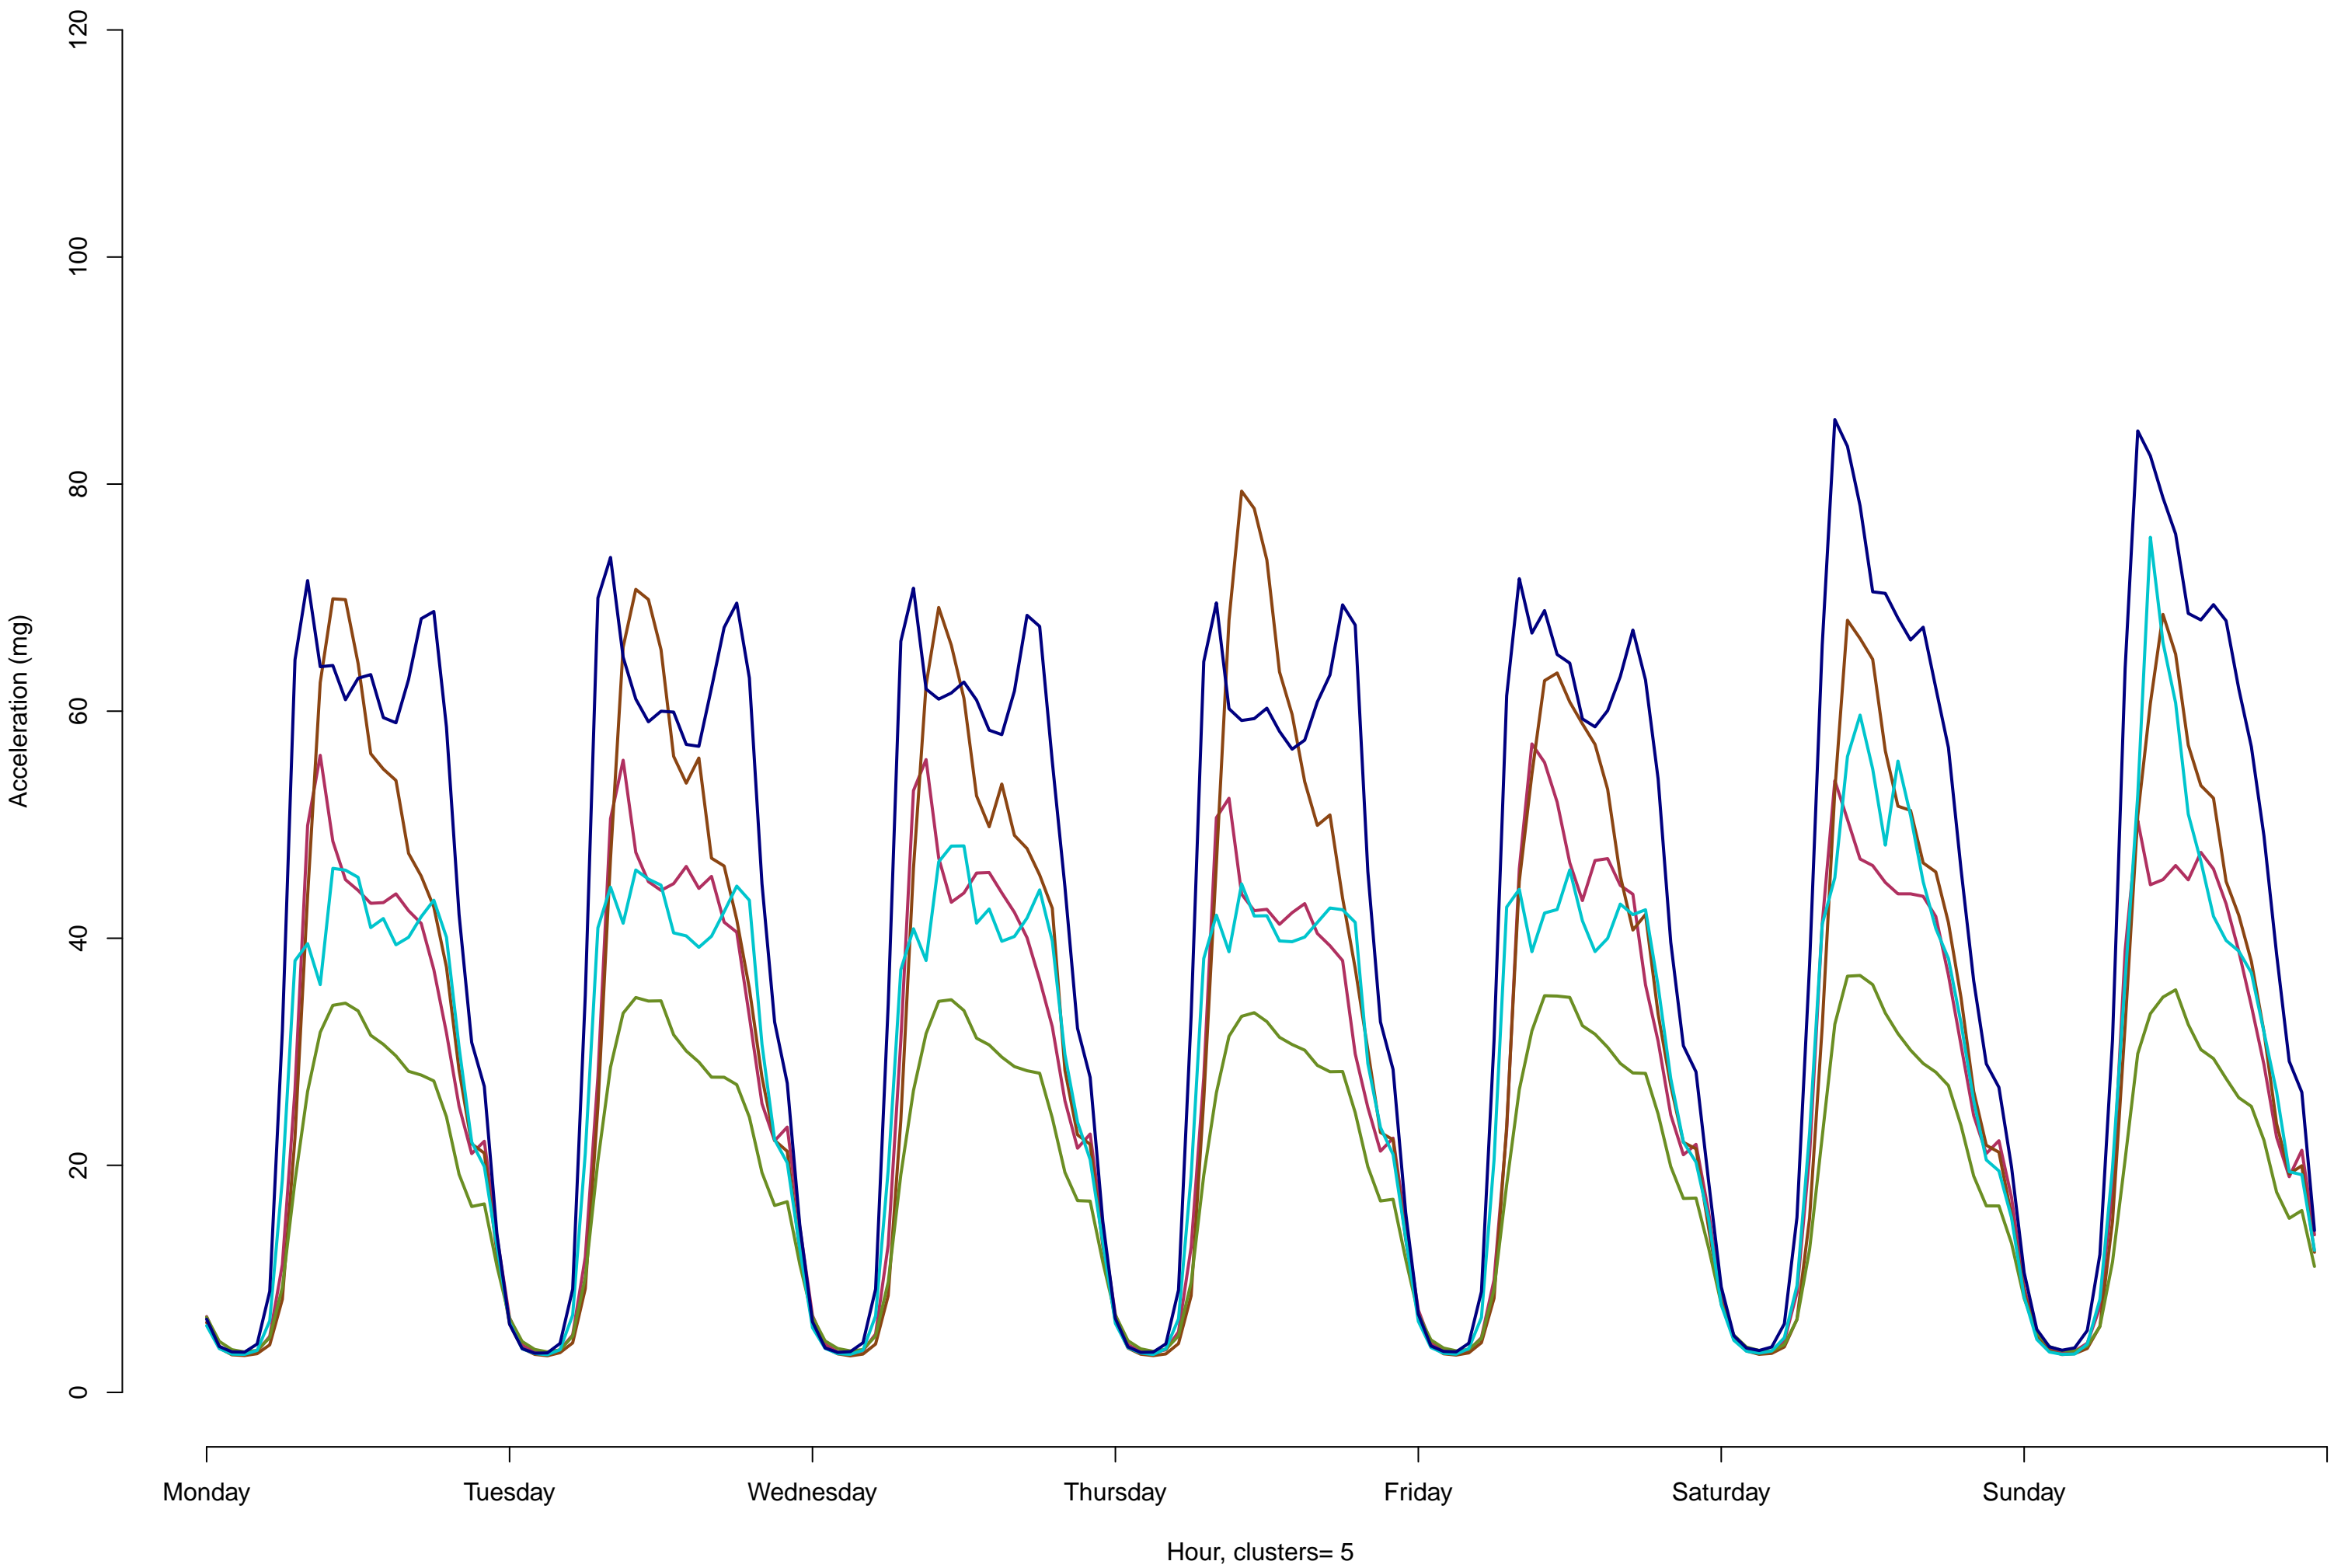

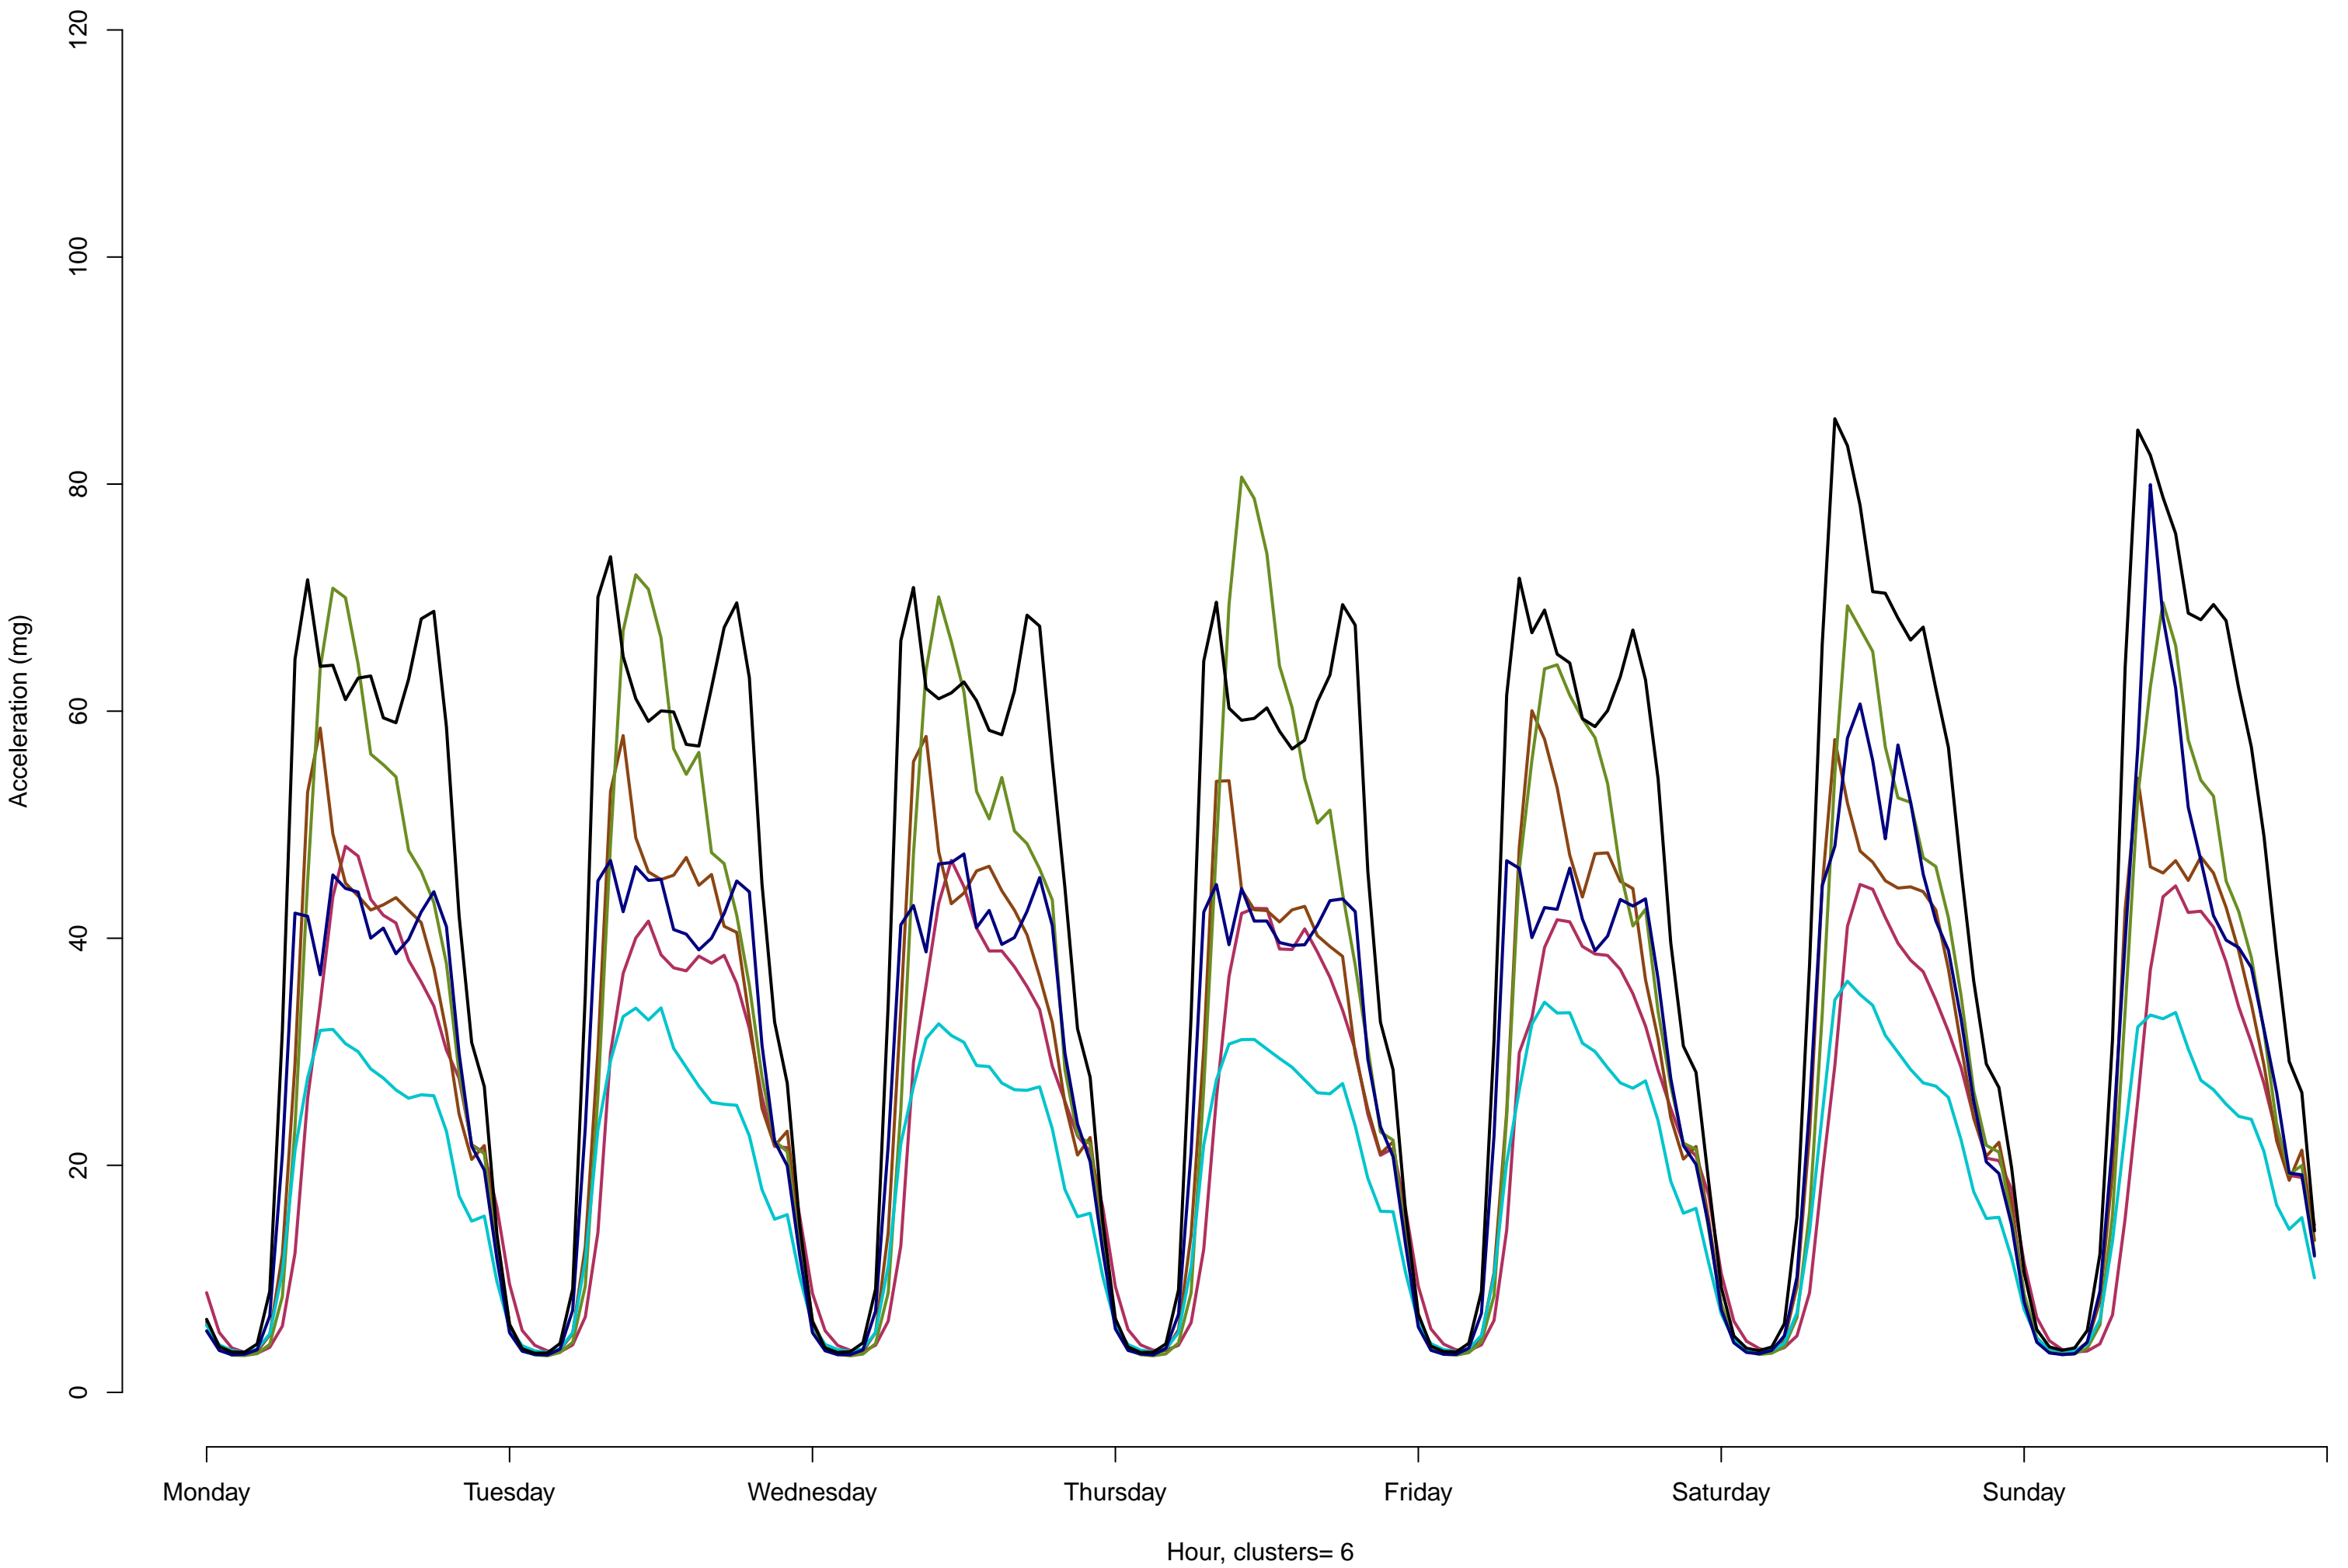

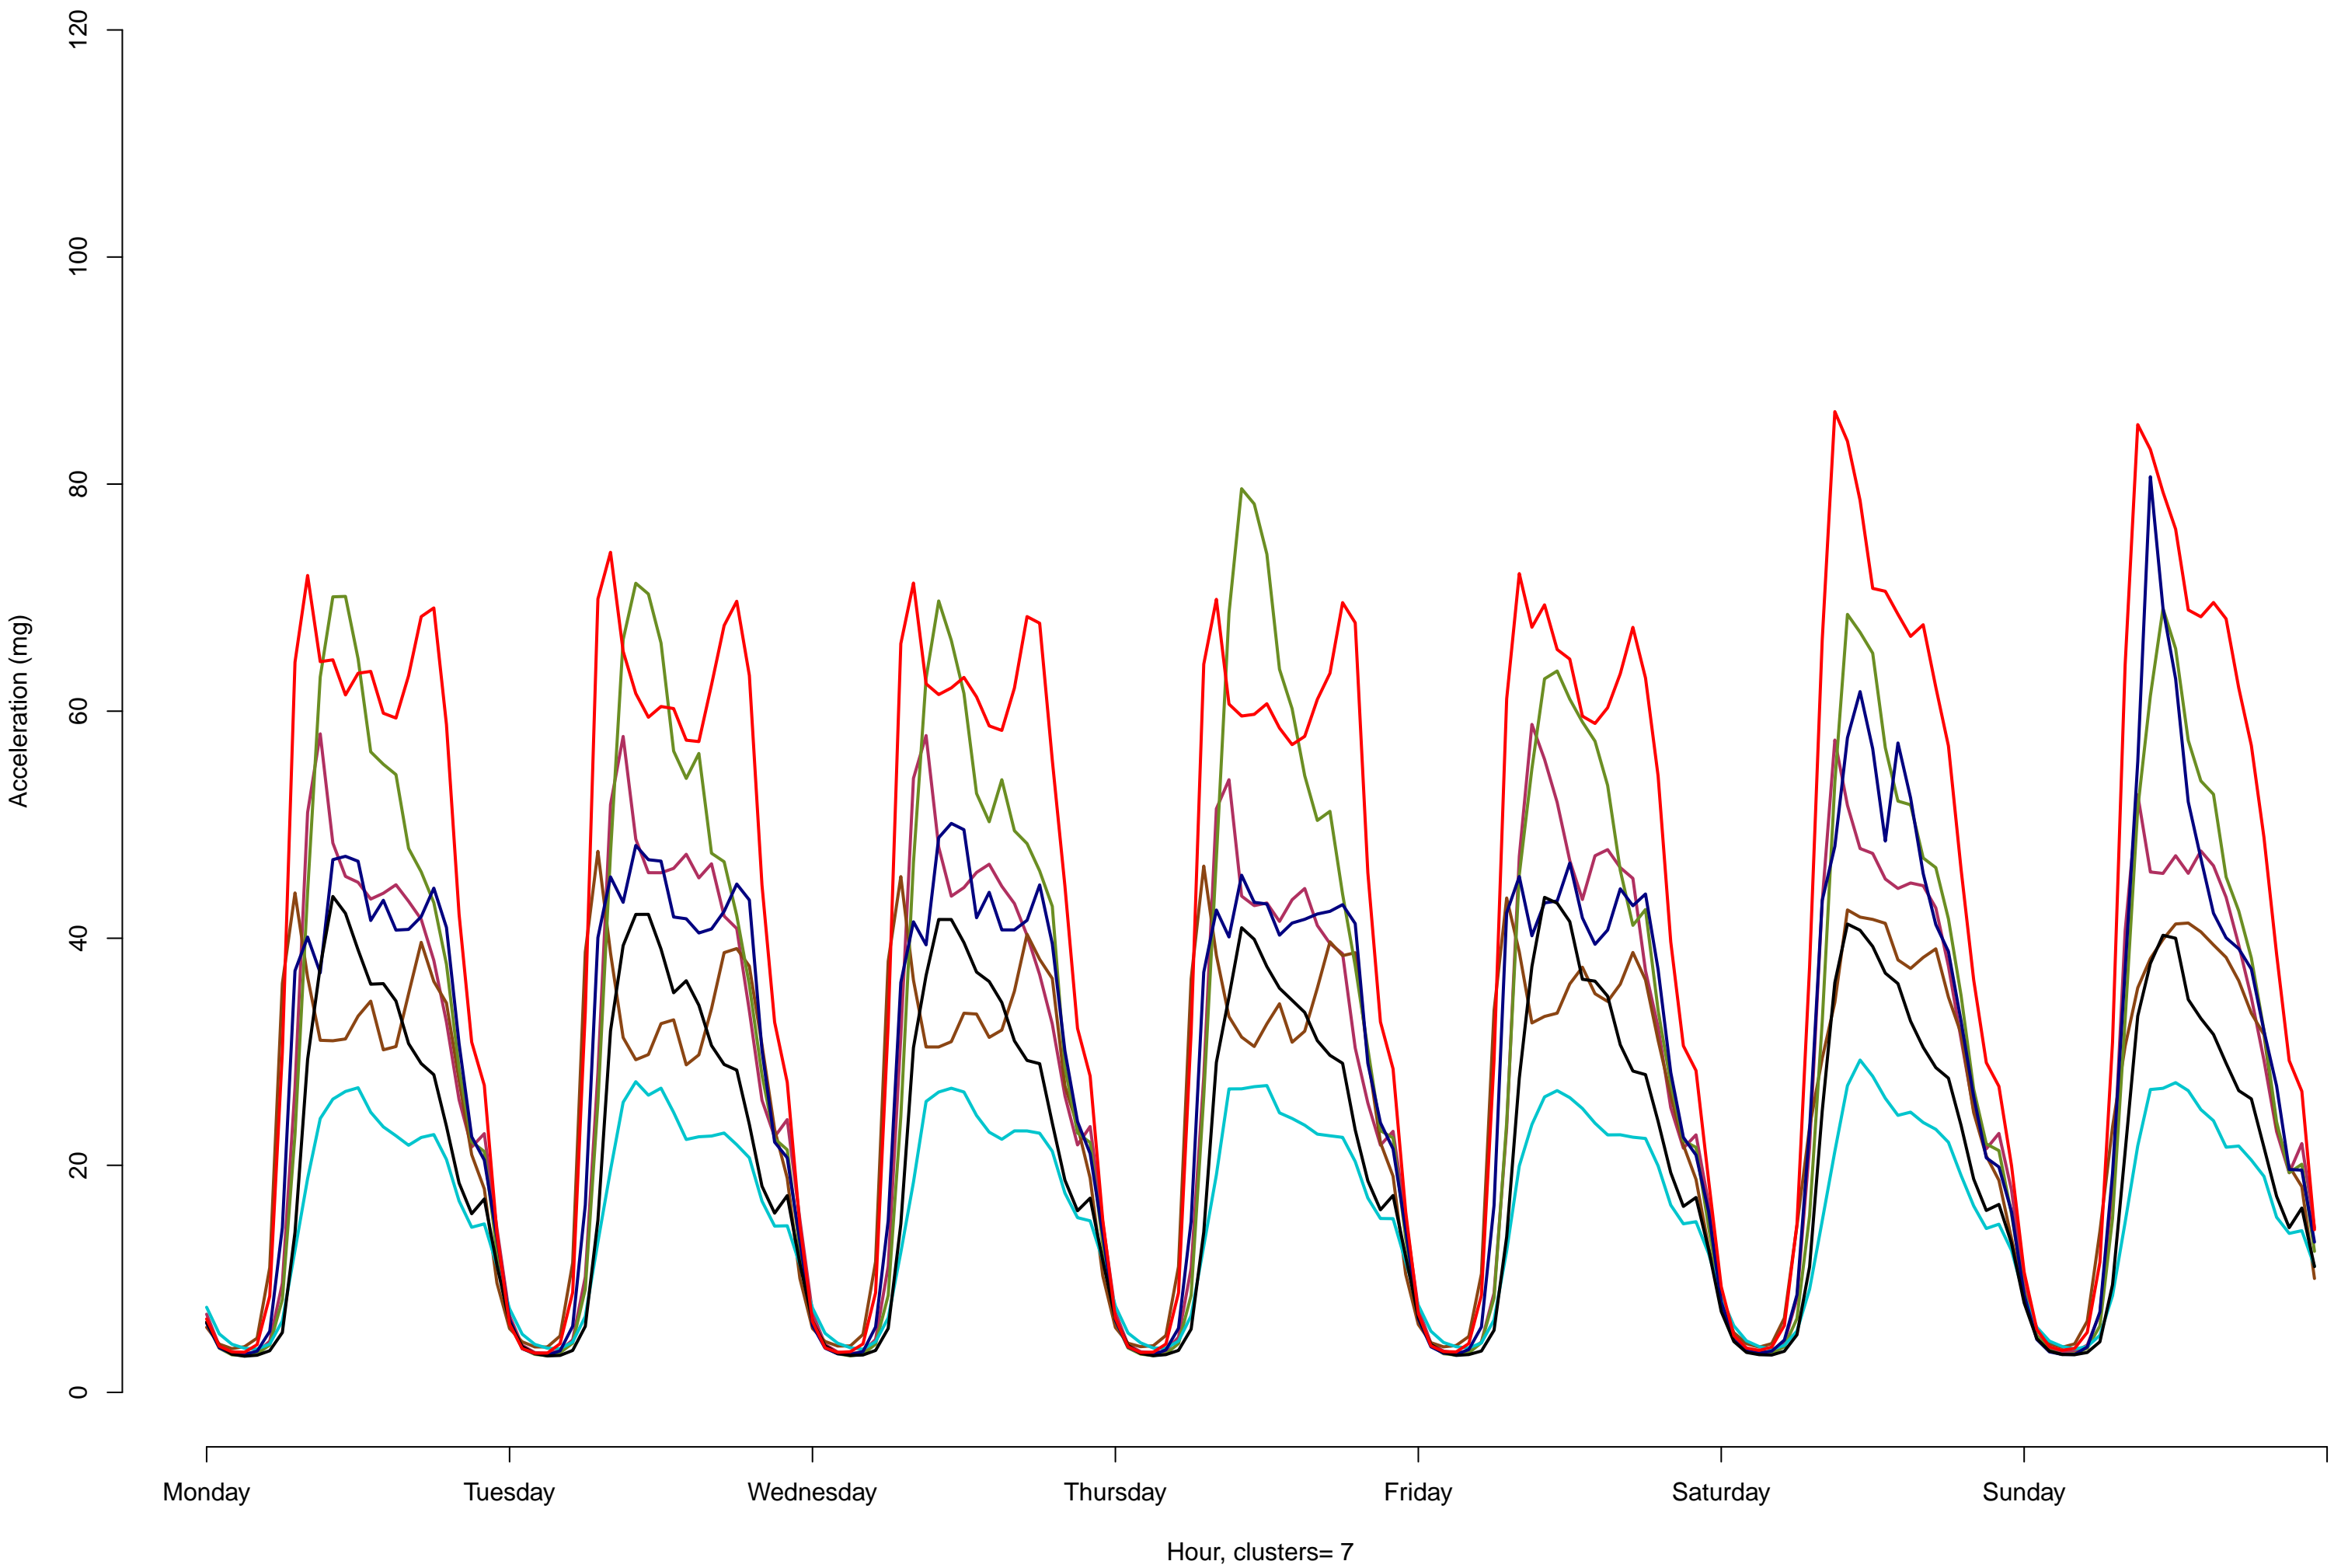

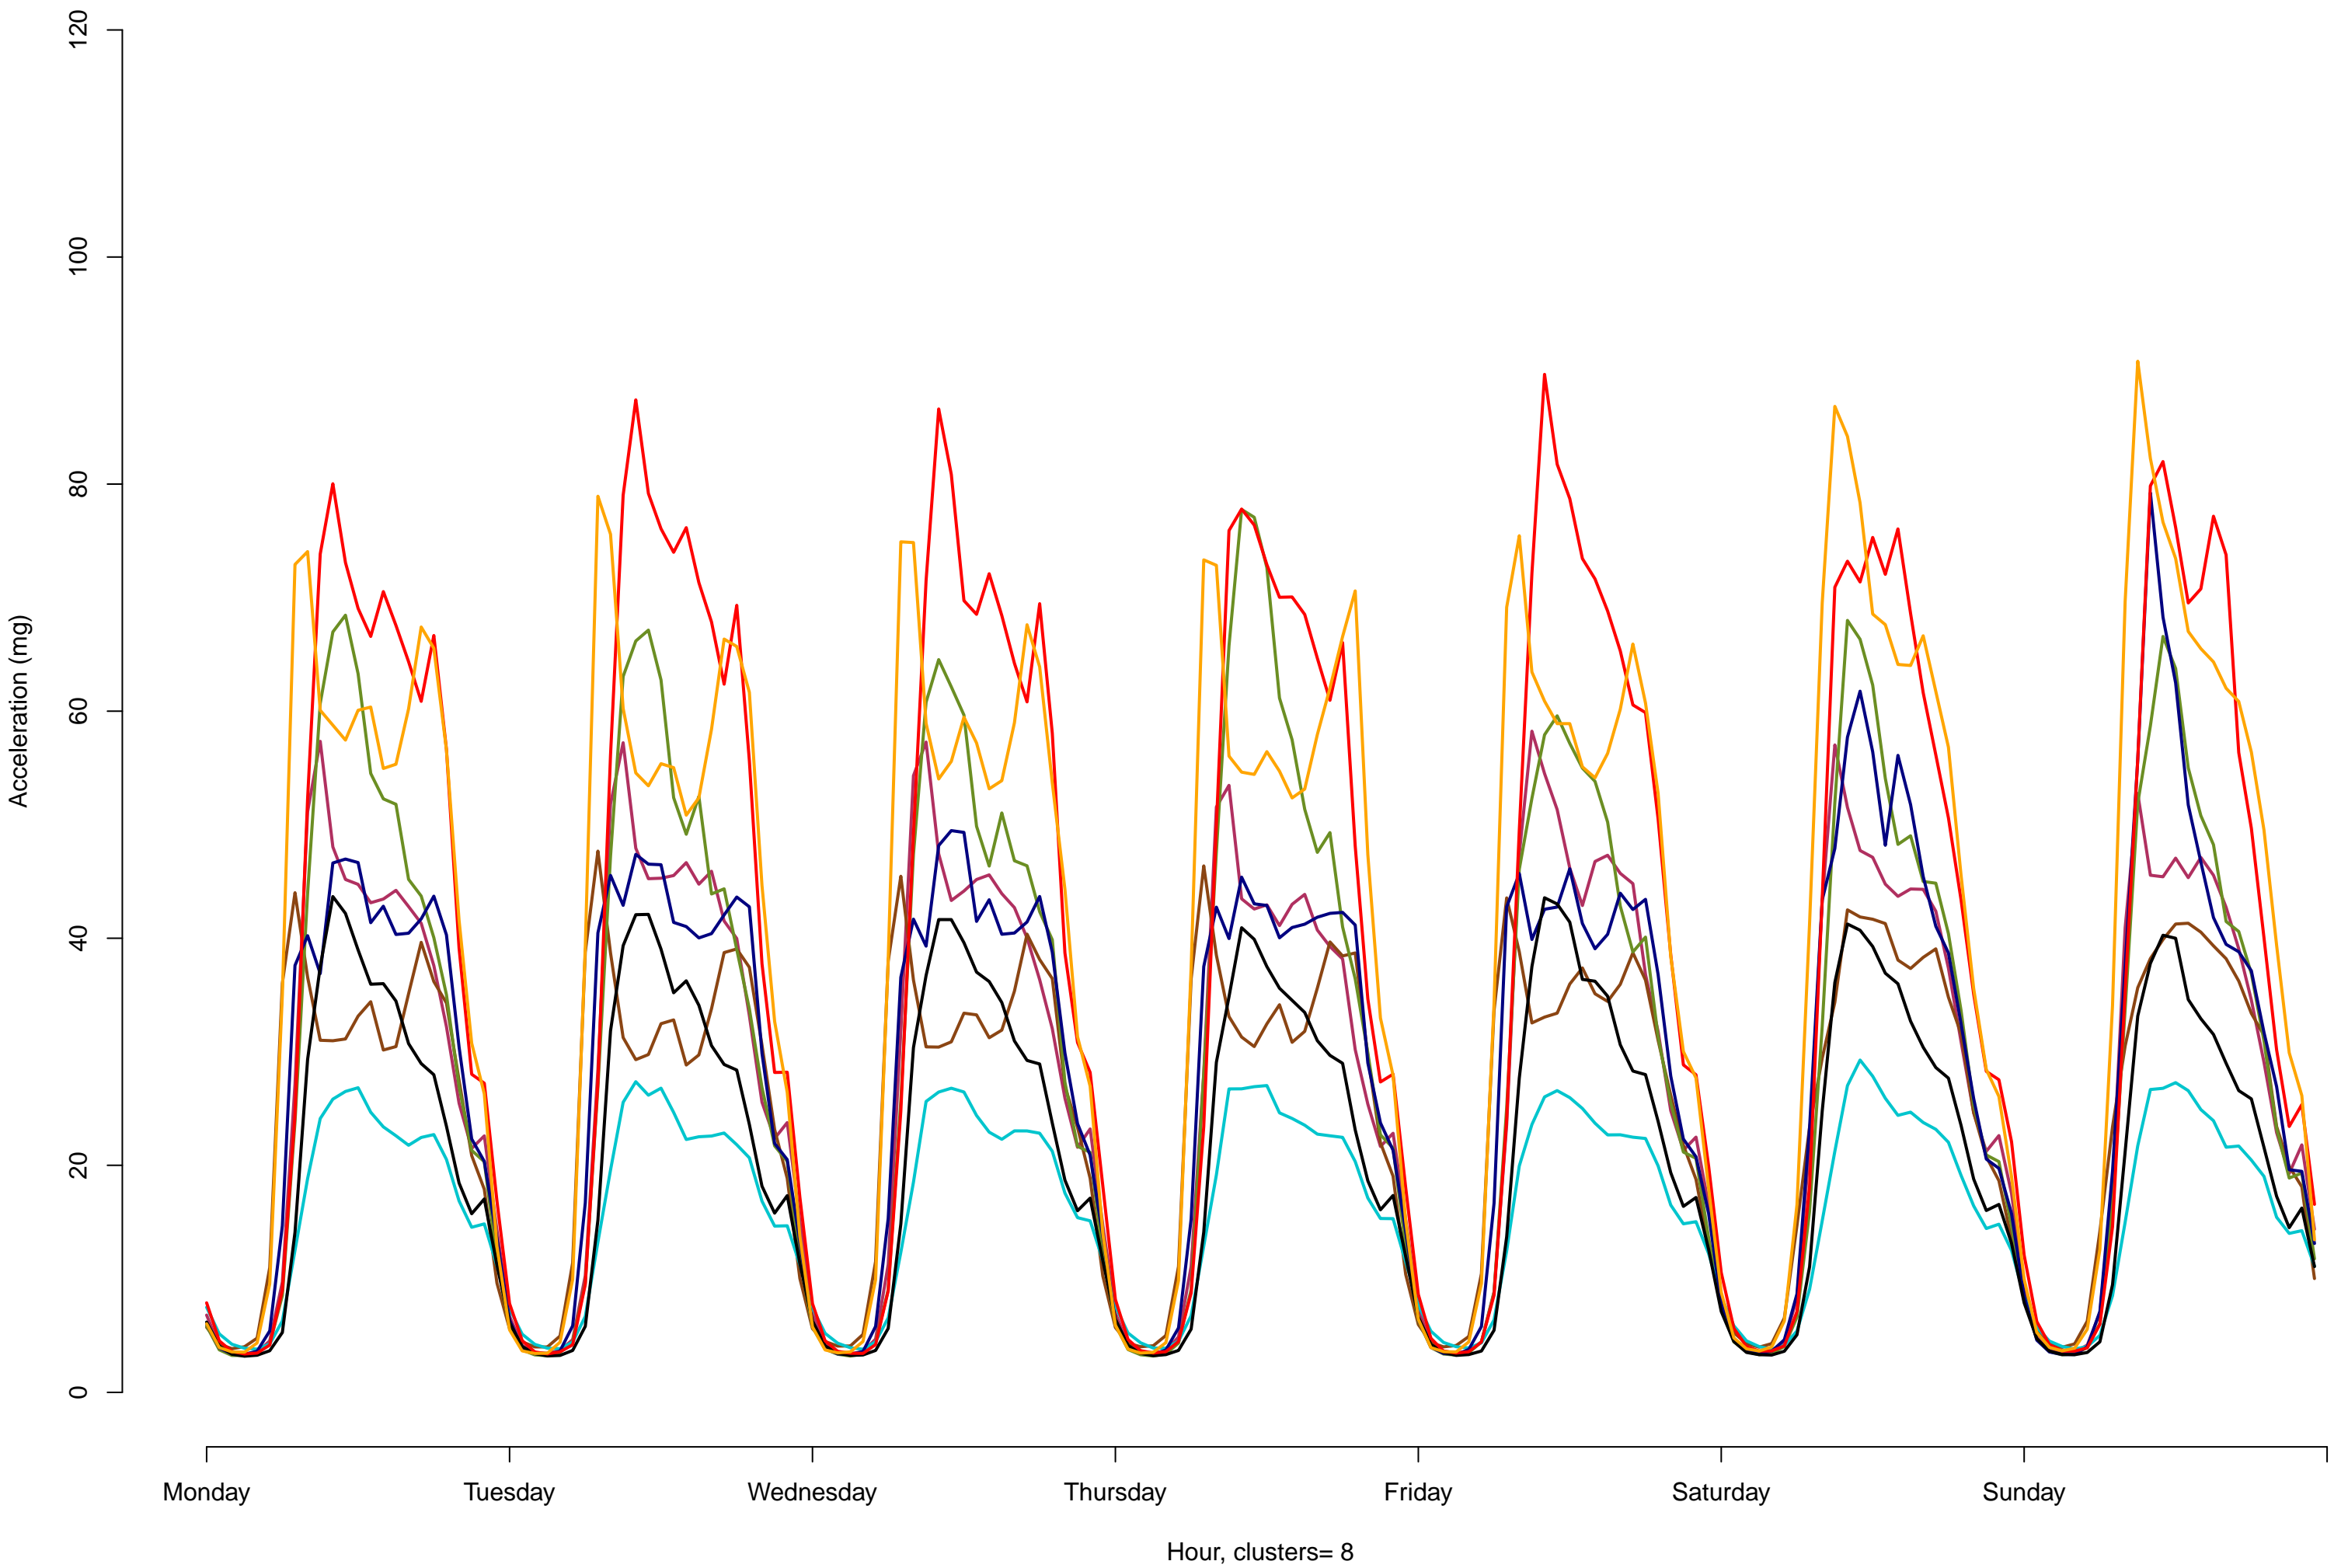



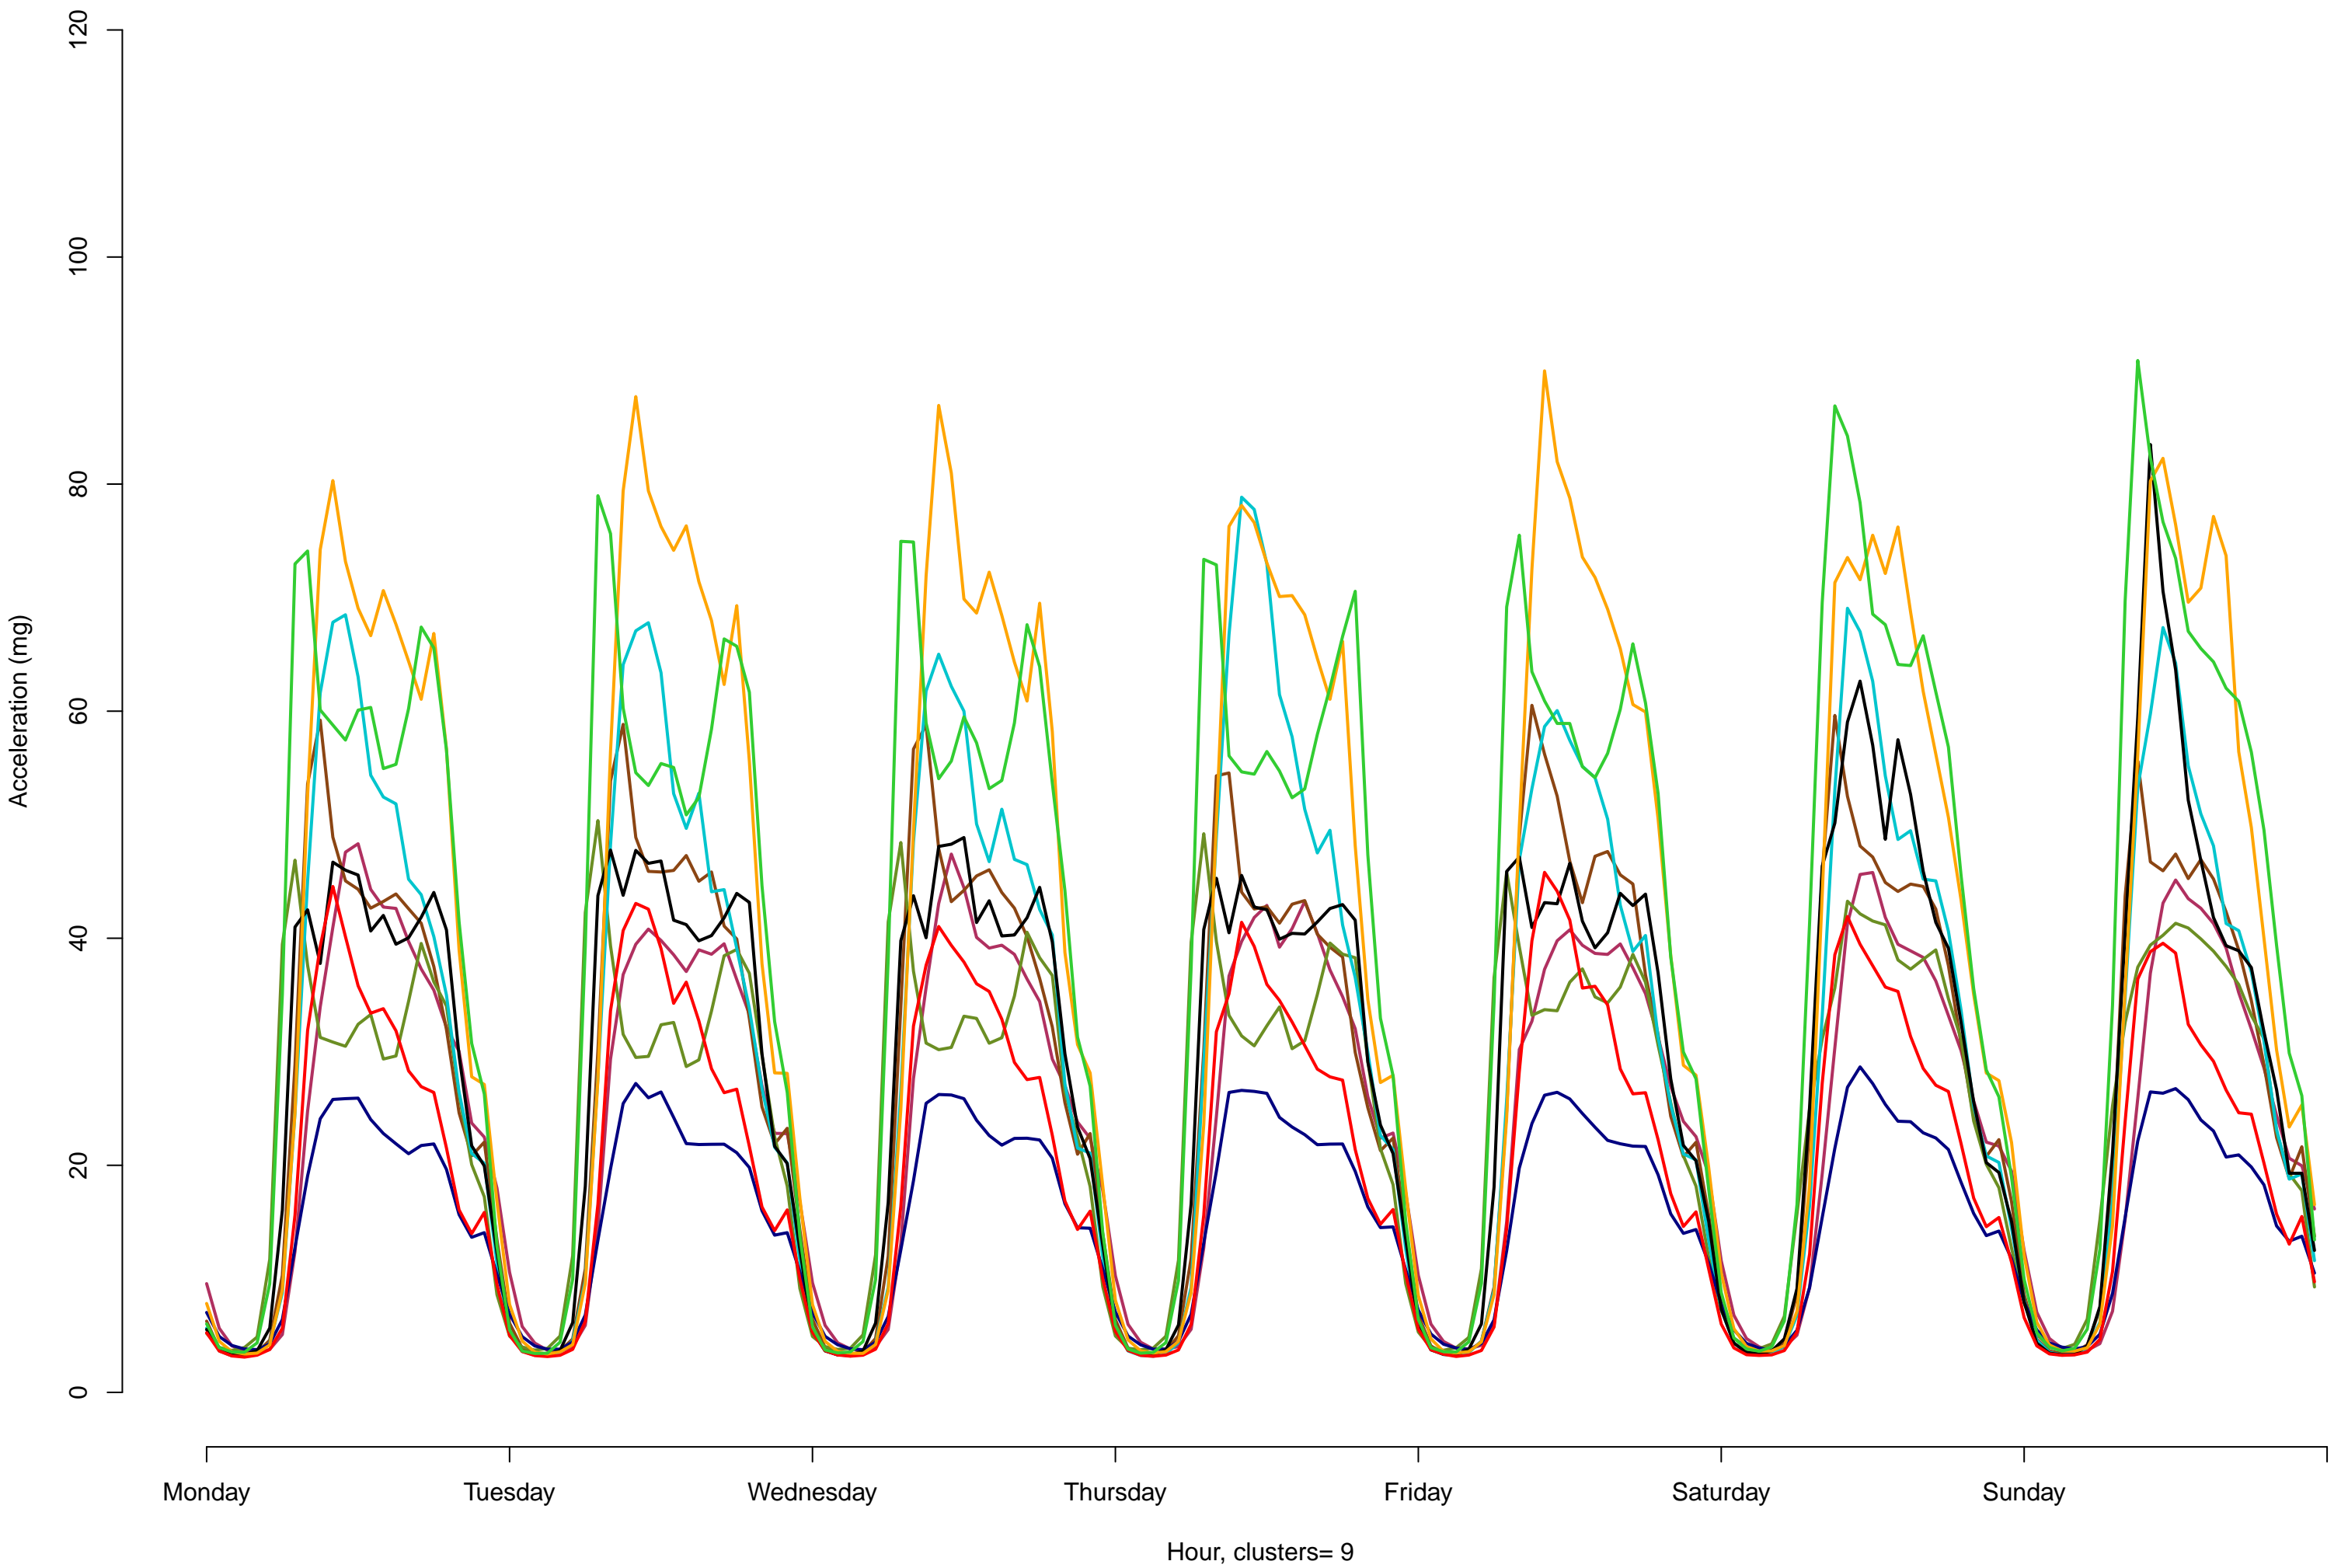

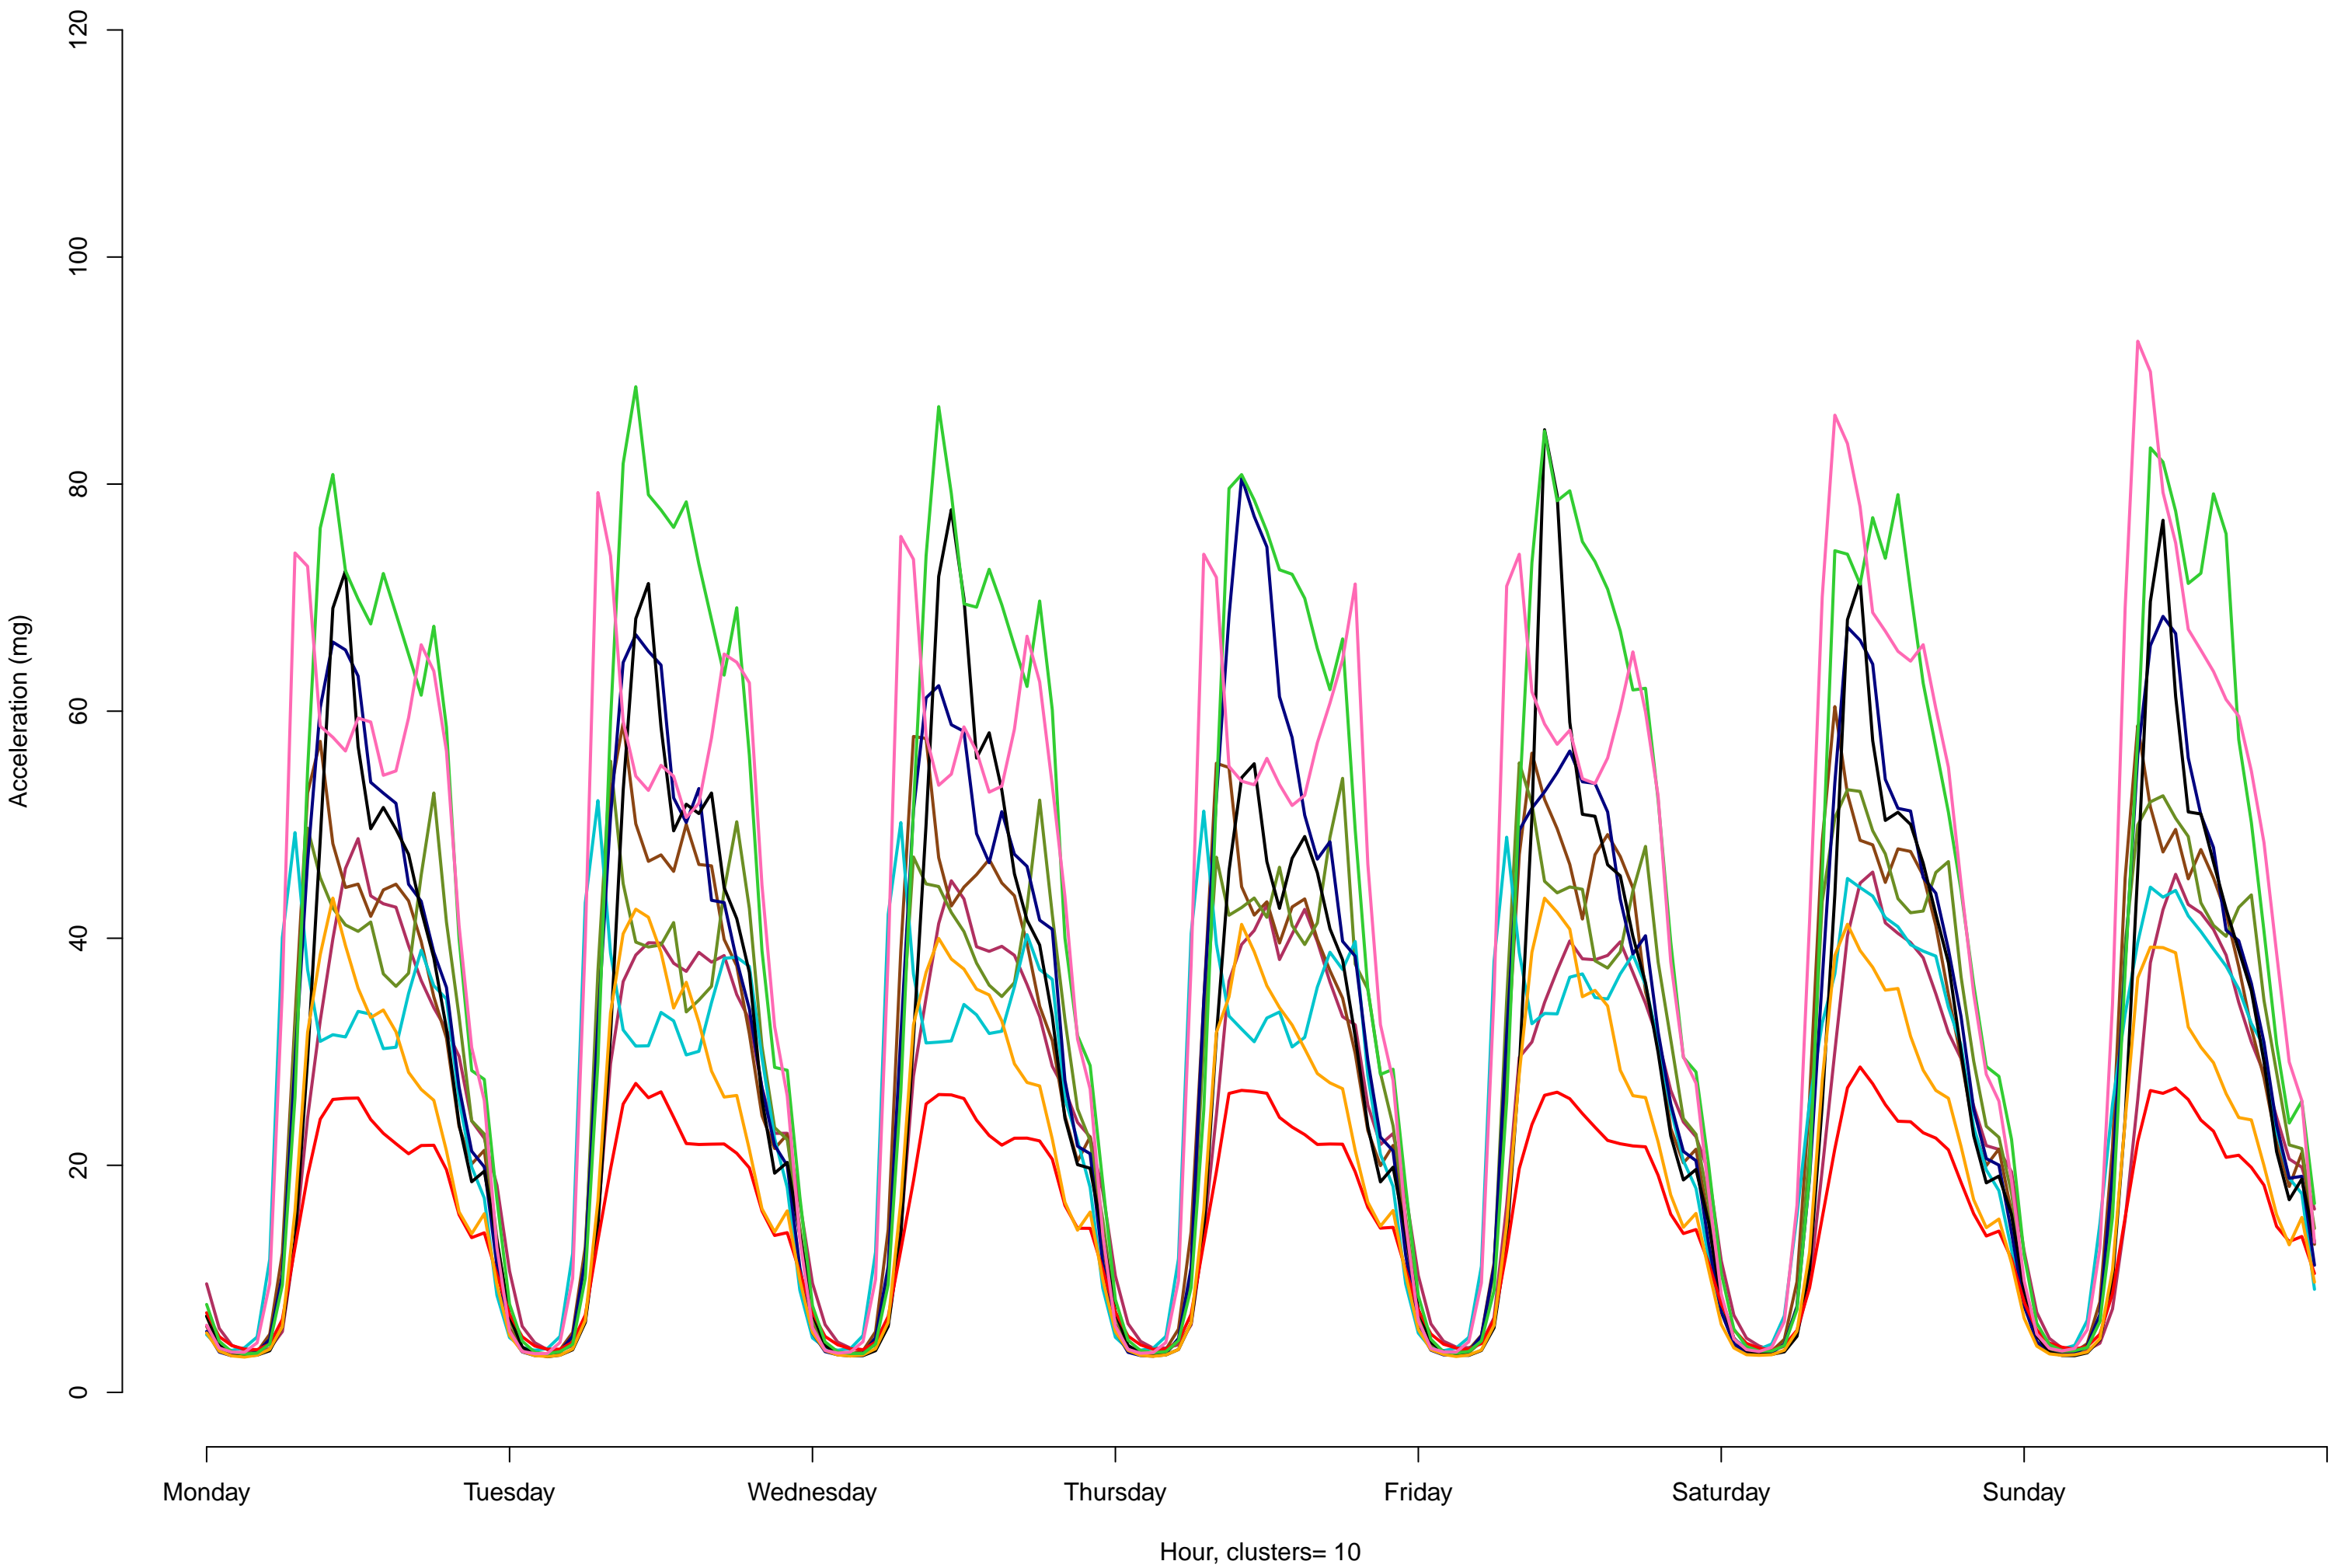

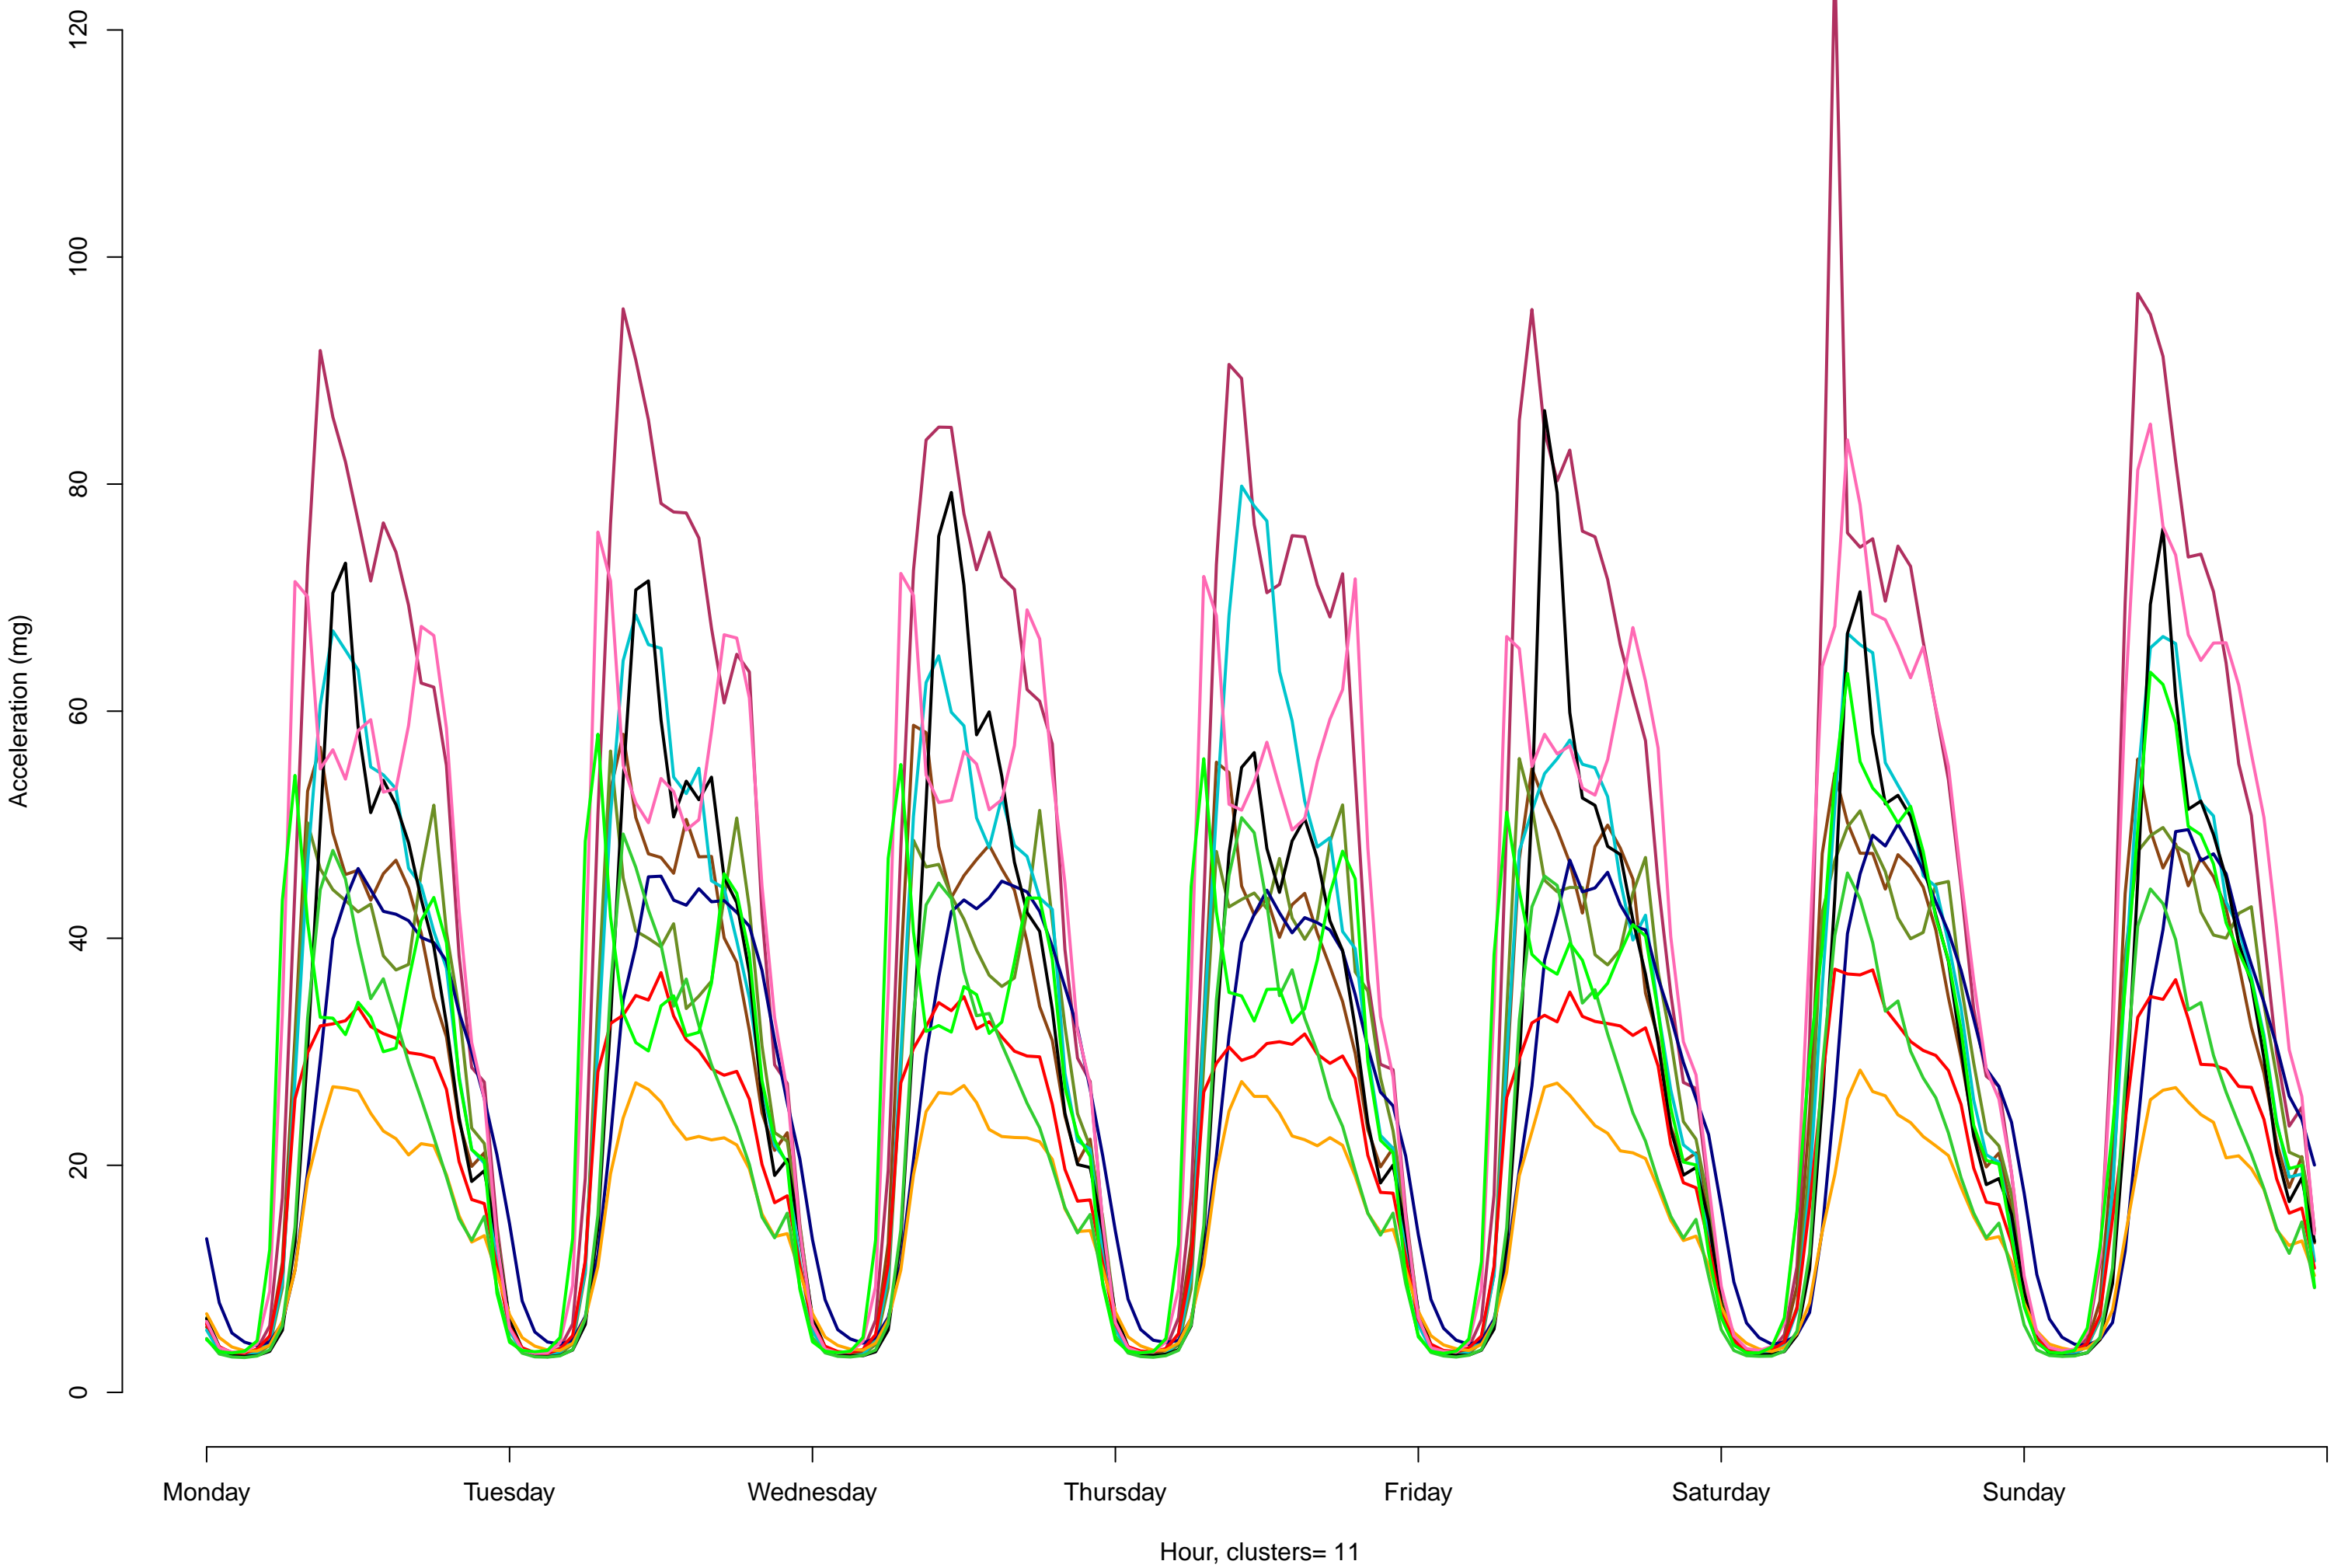

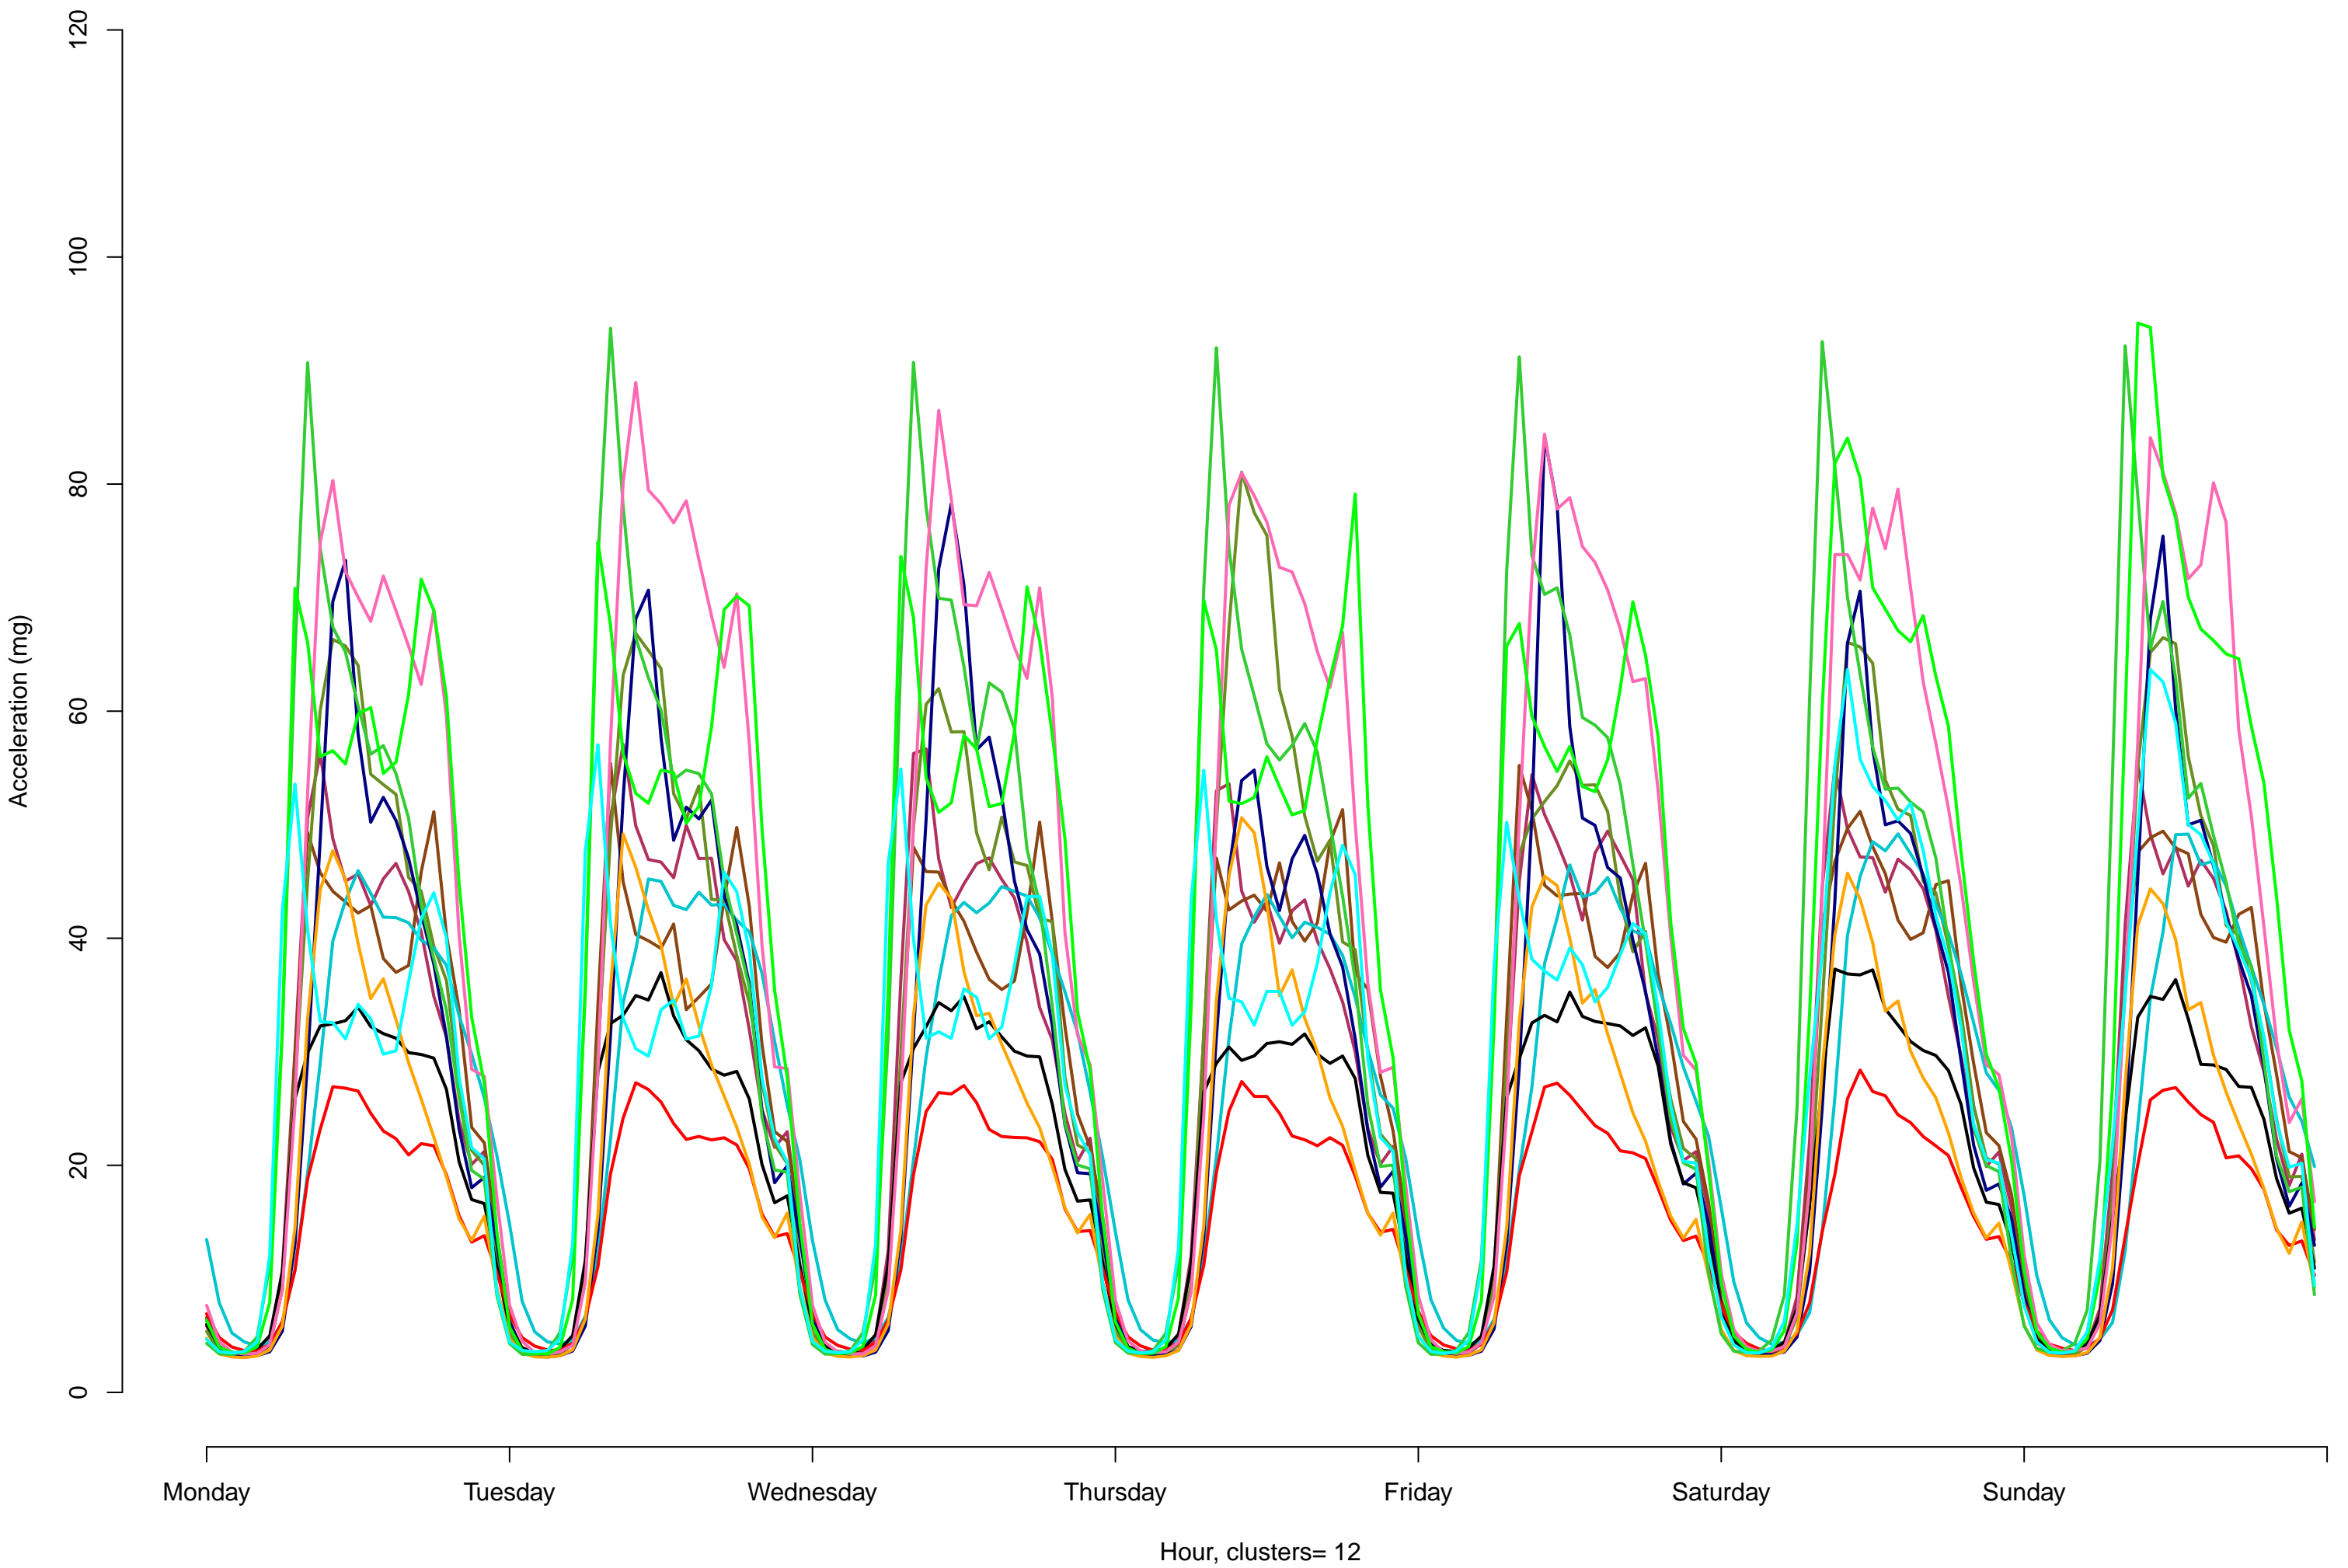



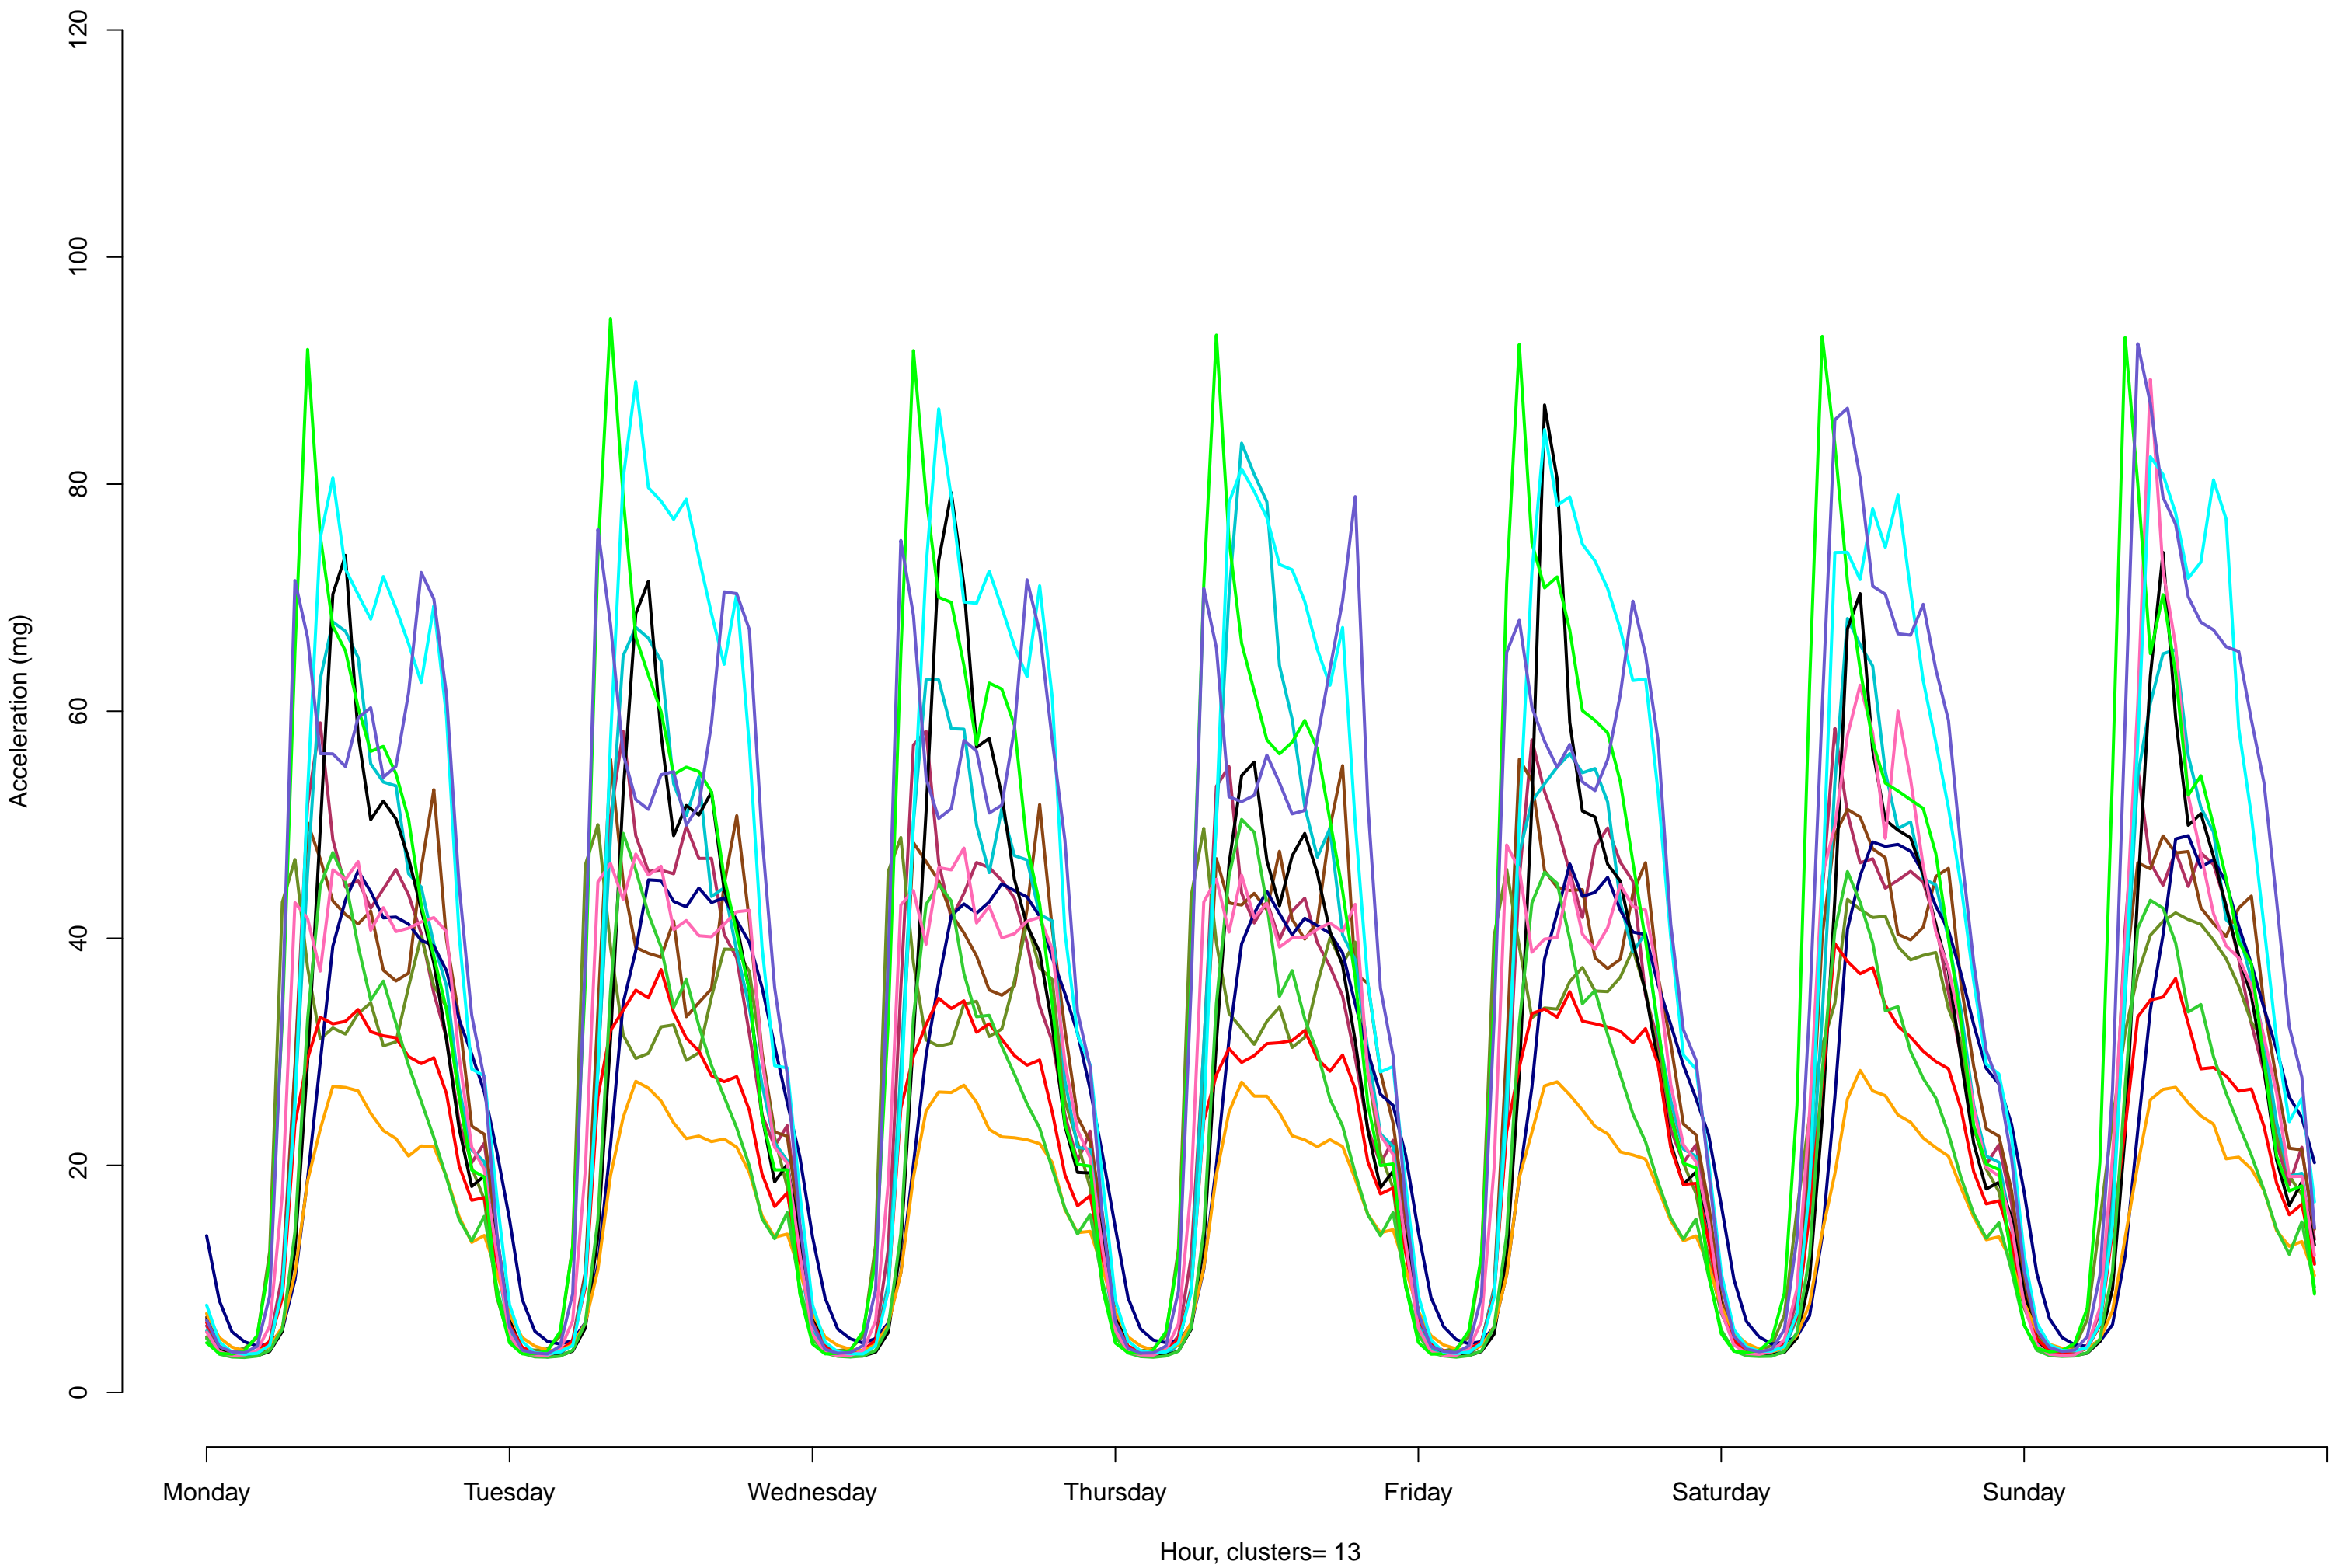

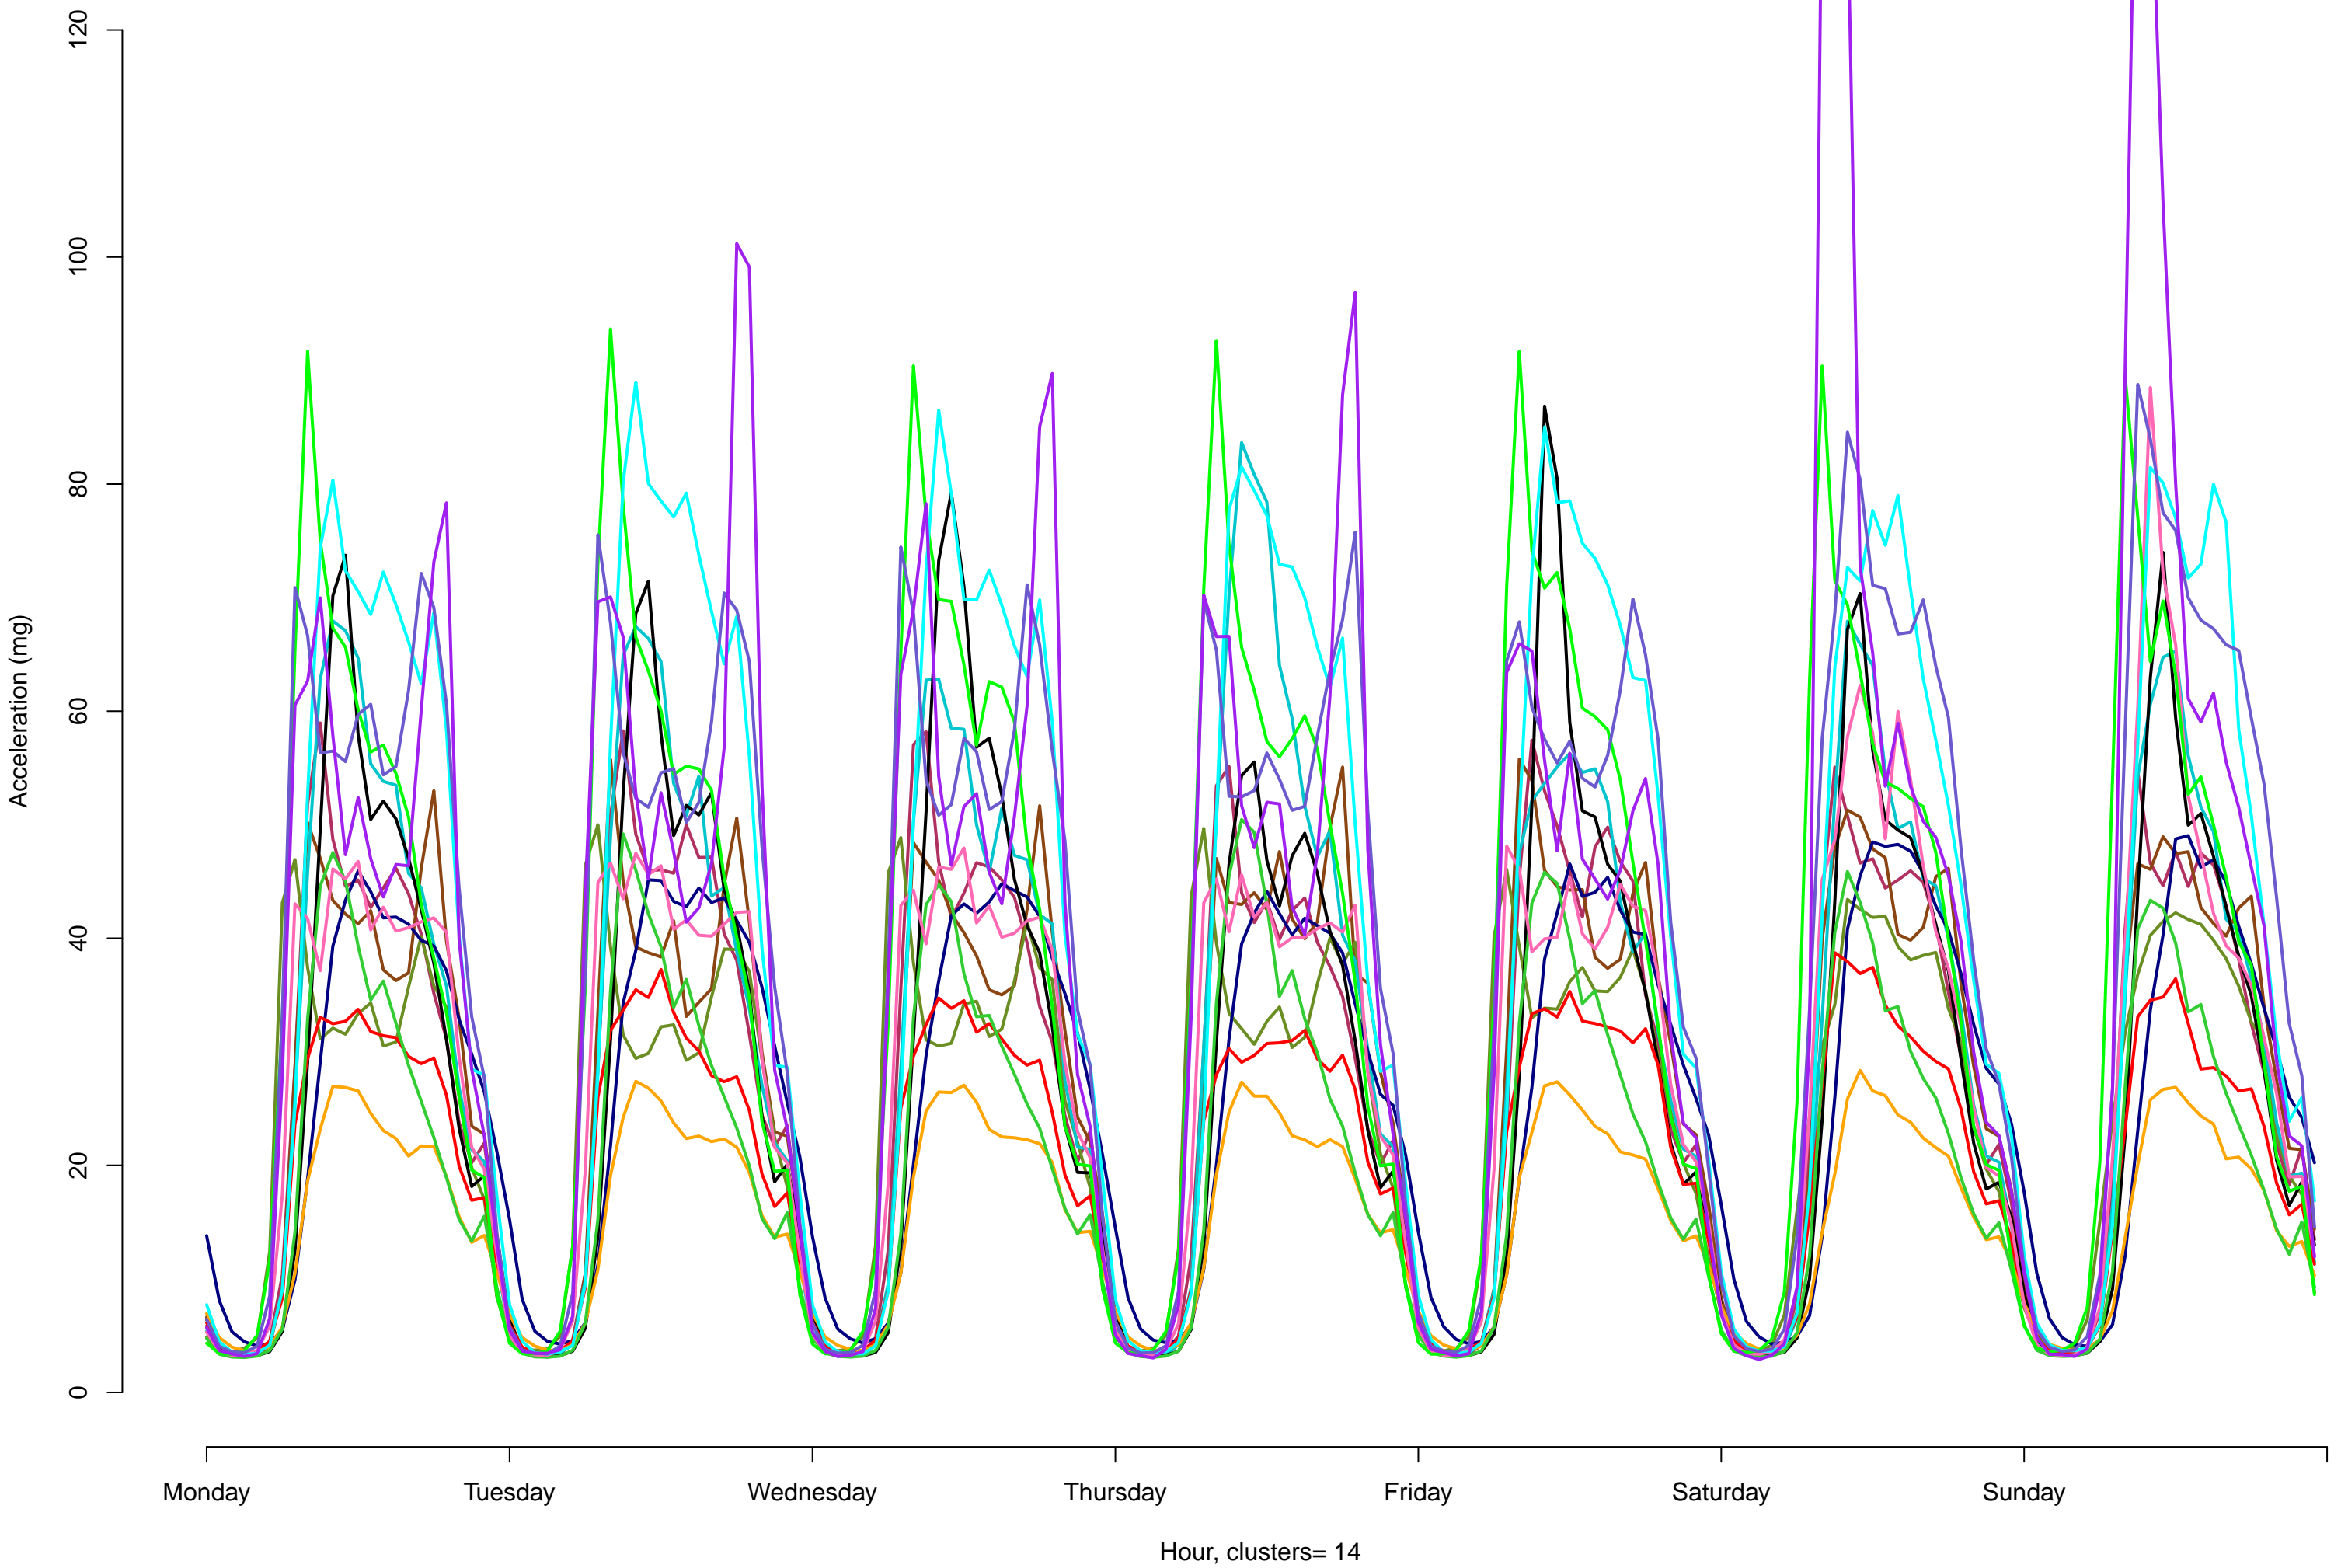

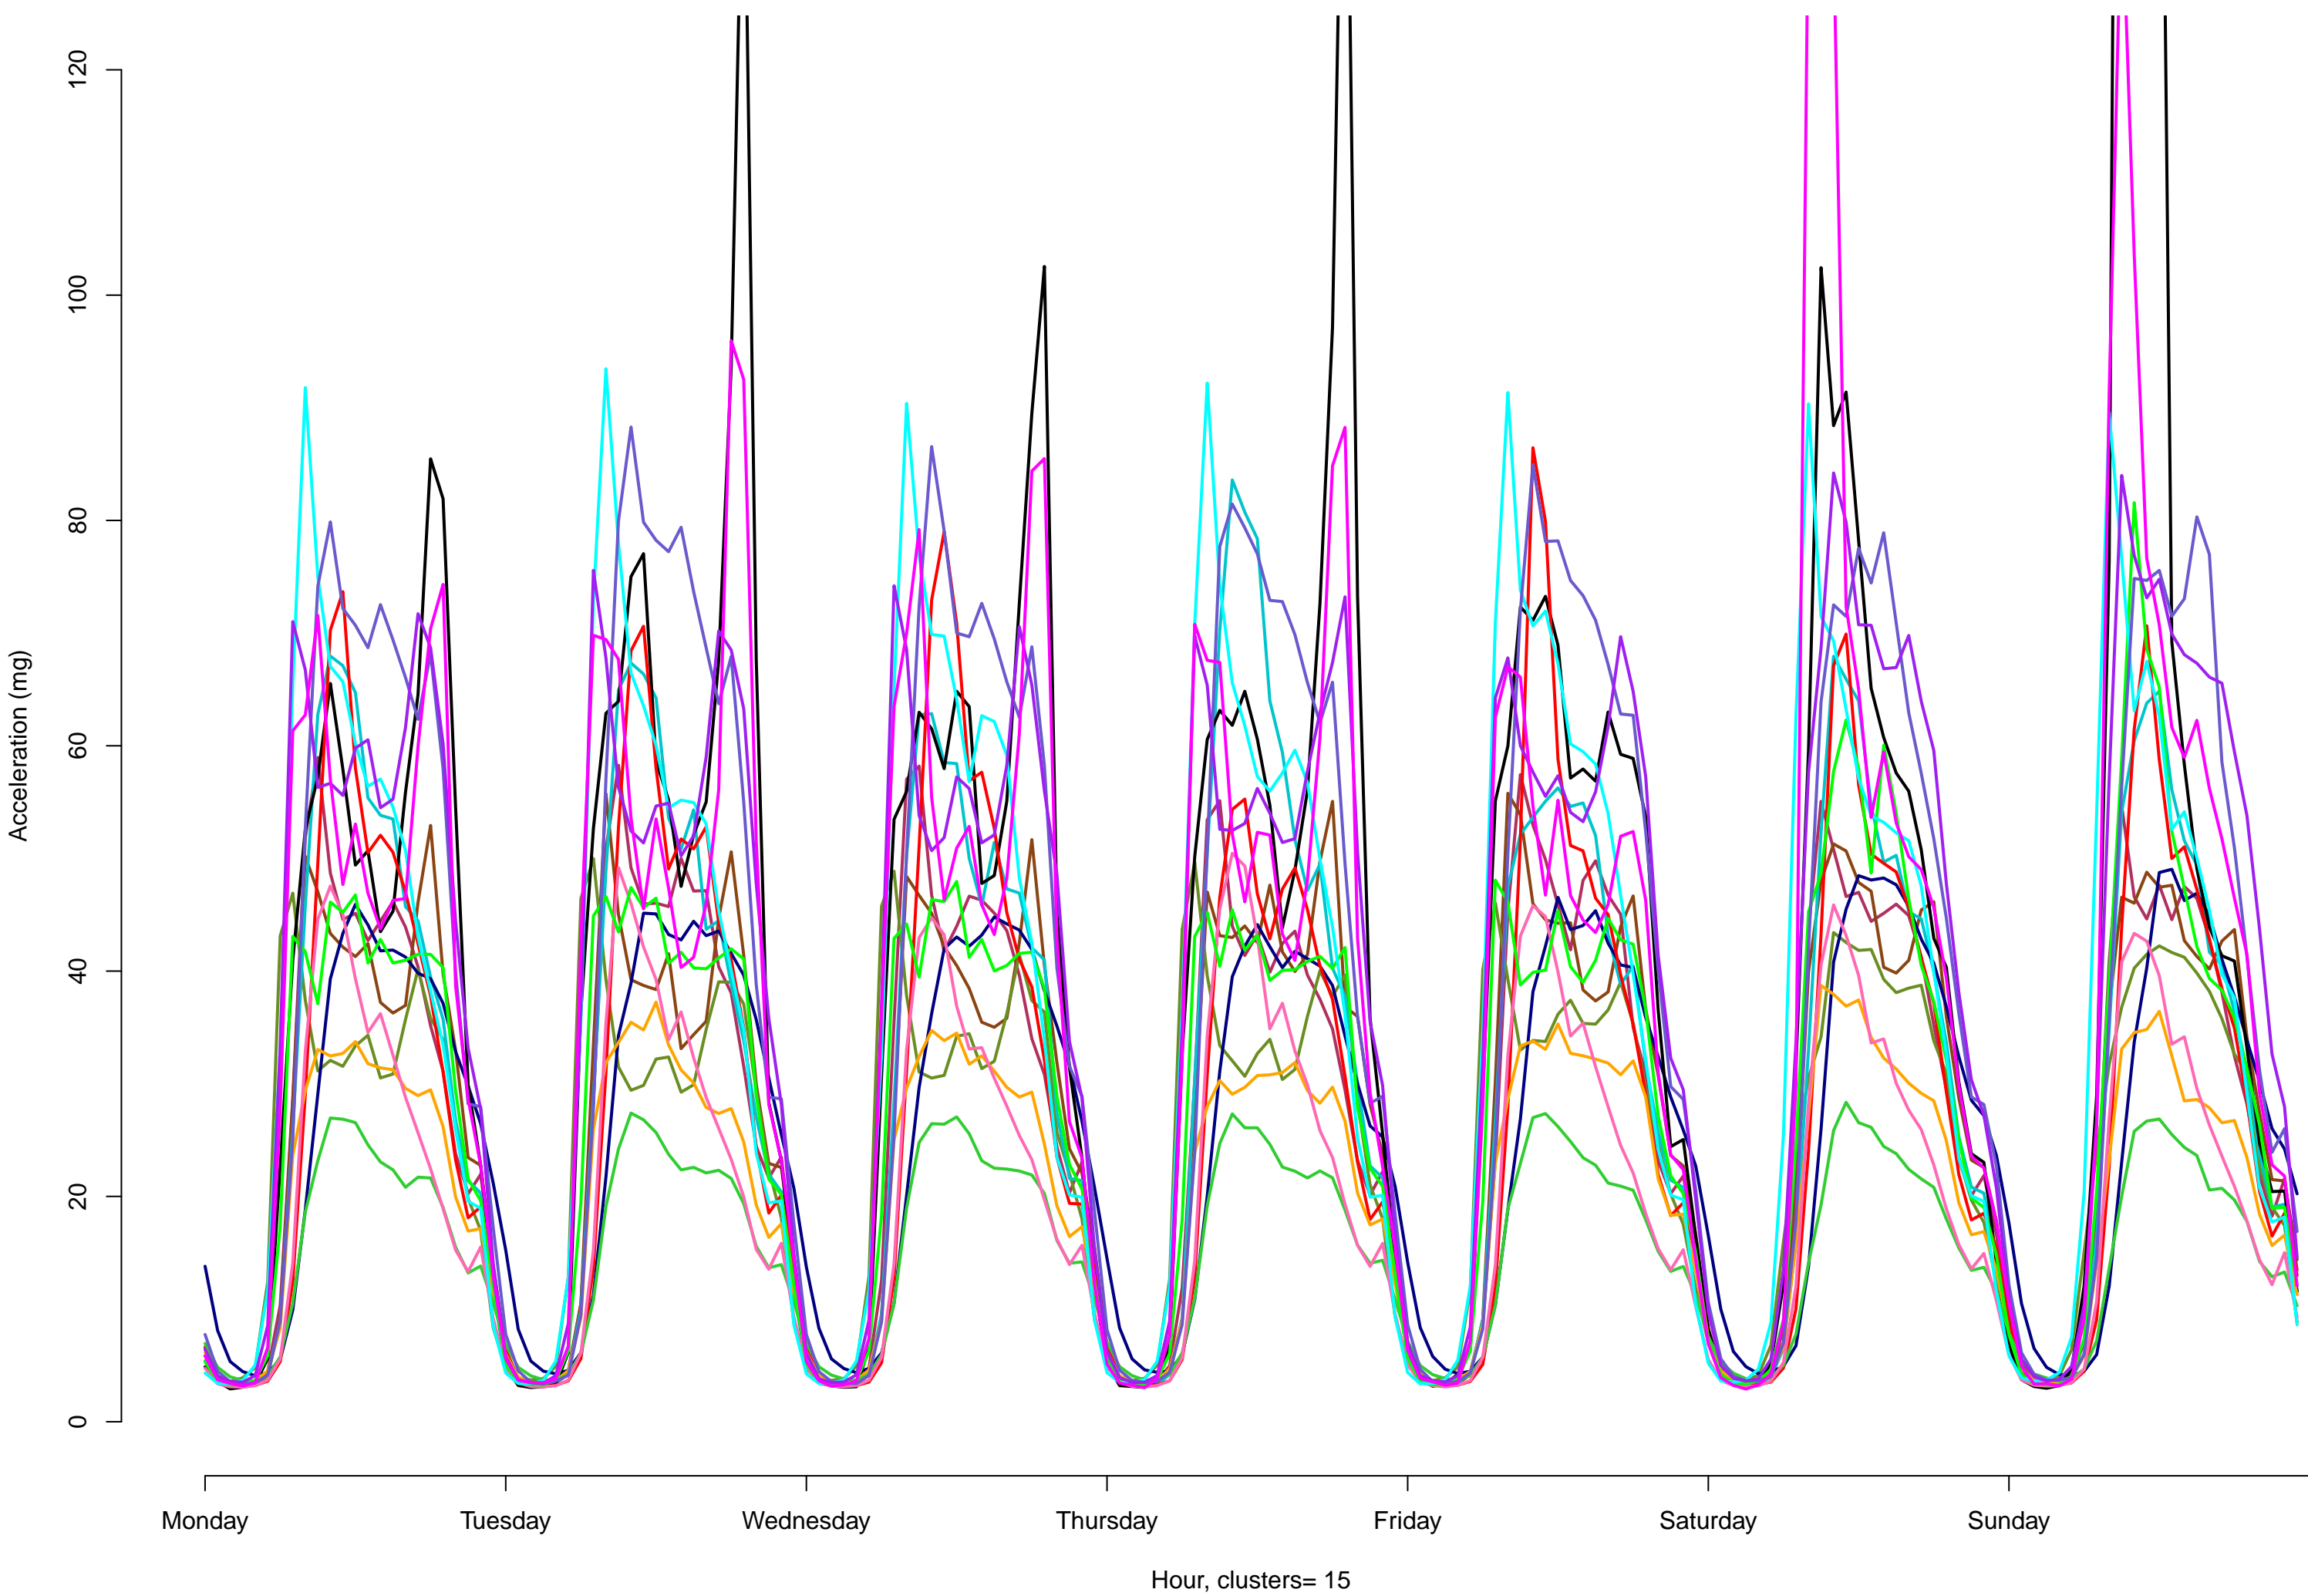



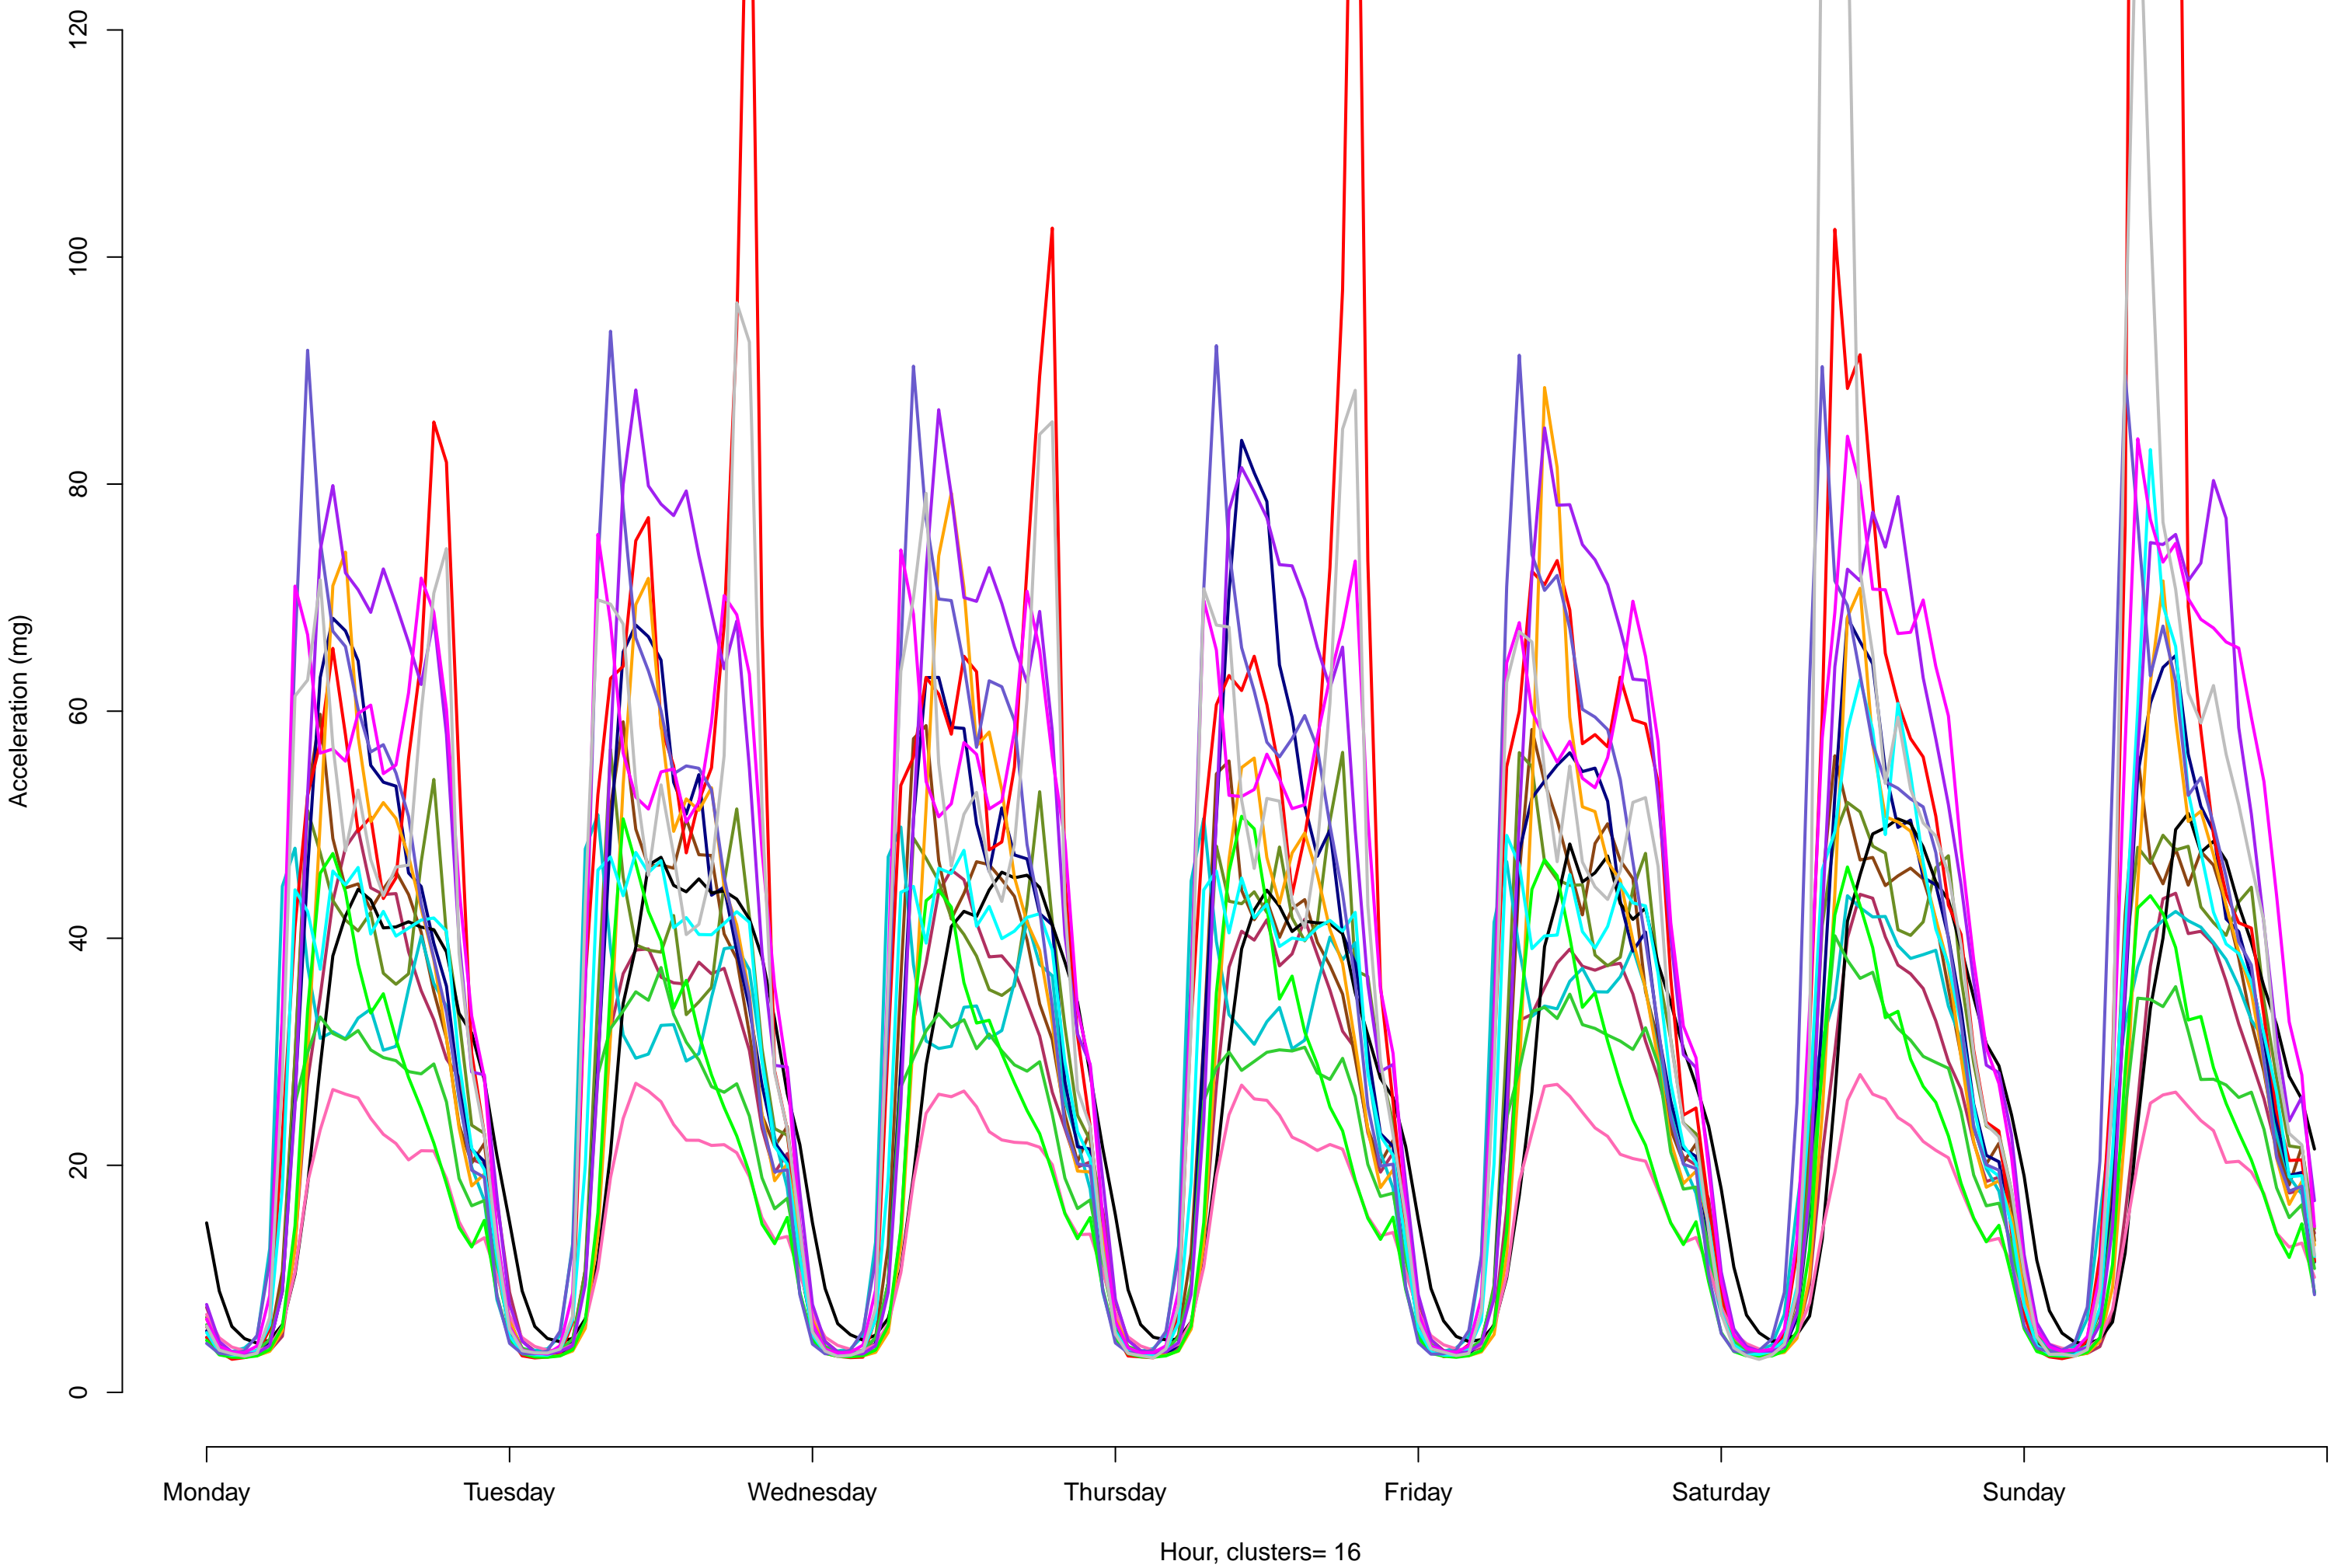

Supplement: s1 [file s1]
